# Supplementary material for: Proteomic Specificity of Soft Contact Lenses for Tear Protein Sampling
Source: bioRxiv or medRxiv preprint supplement (doi:10.1101/2023.05.17.23290135), 2023-05-25
Supplement: Supplementary file [file media-1.pdf]

## Proteomic Specificity of Soft Contact Lenses for Tear Protein Sampling

### Authors

Robert K. Roden <sup>a, b</sup>, robkroden@gmail.com  
Fangfang Jiang <sup>a</sup>, fangfangjiang123@gmail.com  
Nathan Zuniga <sup>a</sup>, natezu93@gmail.com  
Rebecca S. Burlett <sup>a</sup>, burlett.rebecca@gmail.com  
Alyssa Nitz <sup>c</sup>, alyssa@nitz.org  
Joshua C. Wright <sup>a</sup>, wright.c.josh@gmail.com  
Caleb Shelton <sup>a</sup>, calebtshelton@gmail.com  
Alex Reed <sup>a</sup>, aeldstereed@gmail.com  
Connor O. Roper <sup>a</sup>, connor.roper98@gmail.com  
Leena M. Patil <sup>a</sup>, leenapatil@chem.byu.edu  
P. Christine Ackroyd <sup>a</sup>, ackroyd@byu.edu  
Samuel H. Payne <sup>c</sup>, samuel.payne.byu@gmail.com  
John C. Price <sup>a</sup>, jcprice@chem.byu.edu  
Kenneth A. Christensen <sup>a</sup>, kenc@chem.byu.edu

<sup>a</sup> Department of Chemistry & Biochemistry, Brigham Young University, Provo, UT, 84602, USA

<sup>b</sup> College of Optometry, Rocky Mountain University of Health Professions, Provo, UT, 84606, USA

<sup>c</sup> Department of Biology, Brigham Young University, Provo, UT, 84602, USA

## Supplementary Material

### Comfilcon A

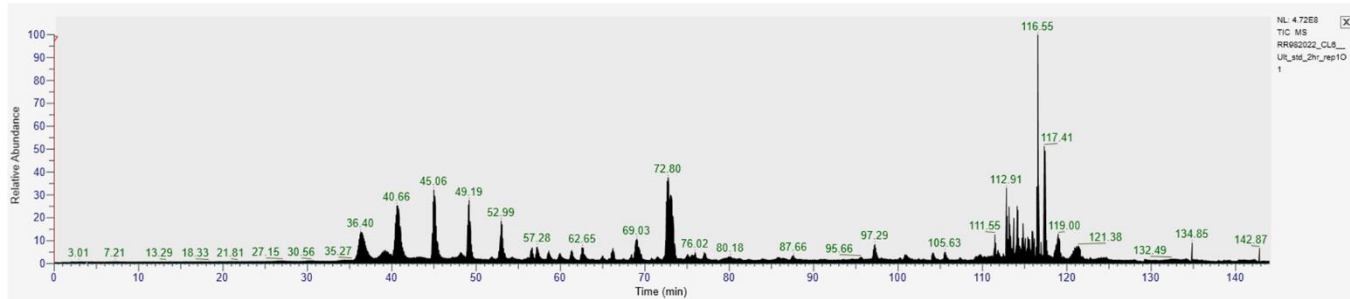

### Delefilcon A

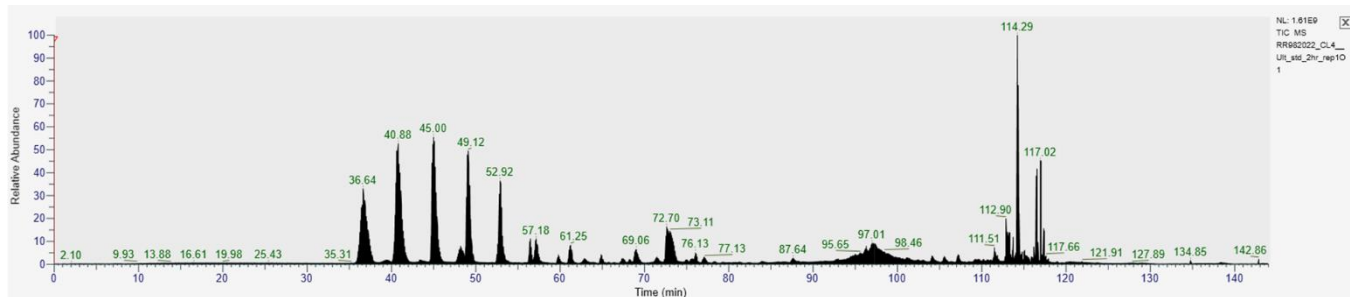

### Etafilcon A

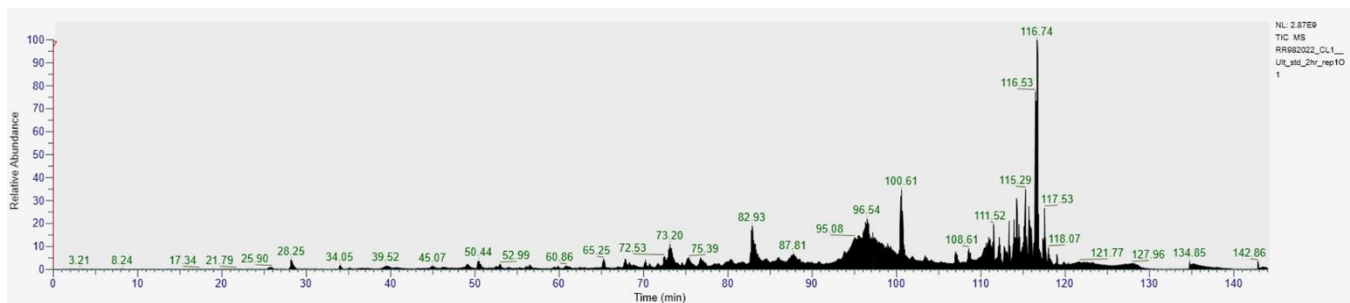

### Lotrafilcon B

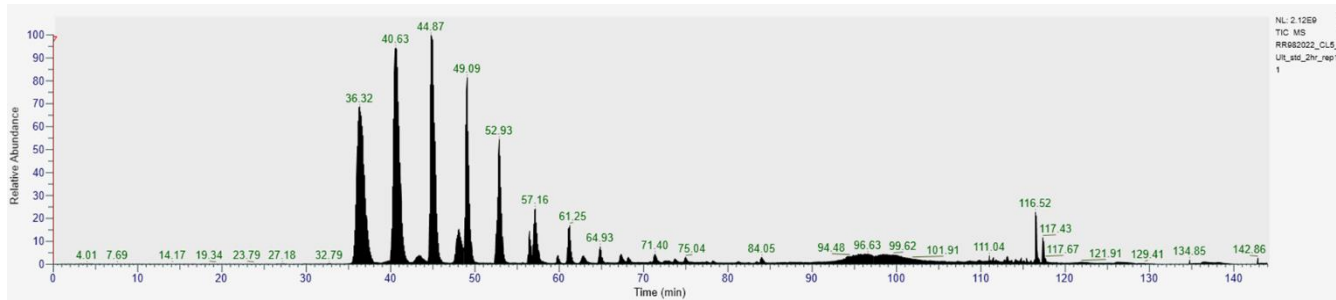

Nelfilcon A

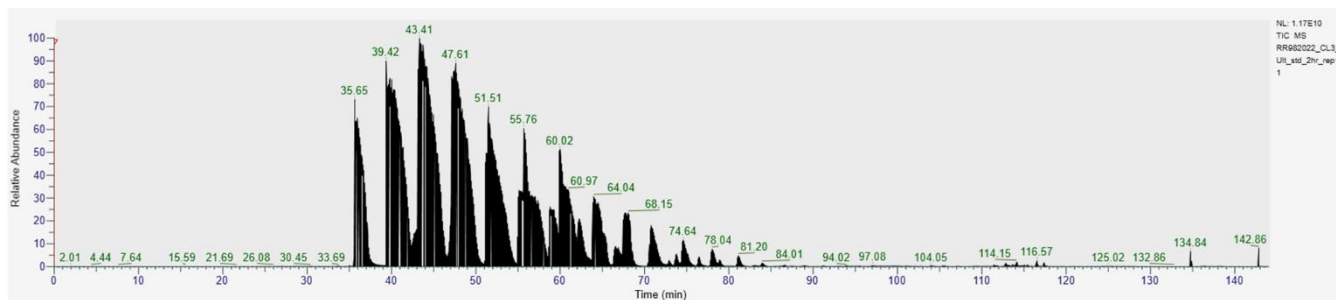

Nesofilcon A

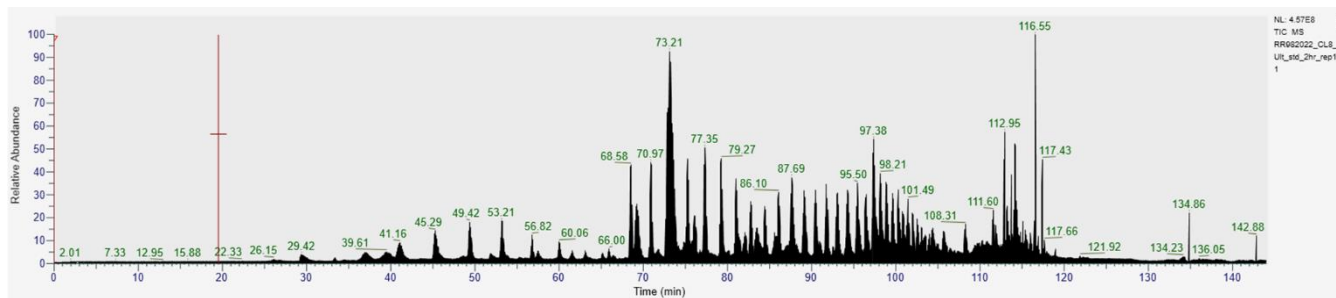

Senofilcon A

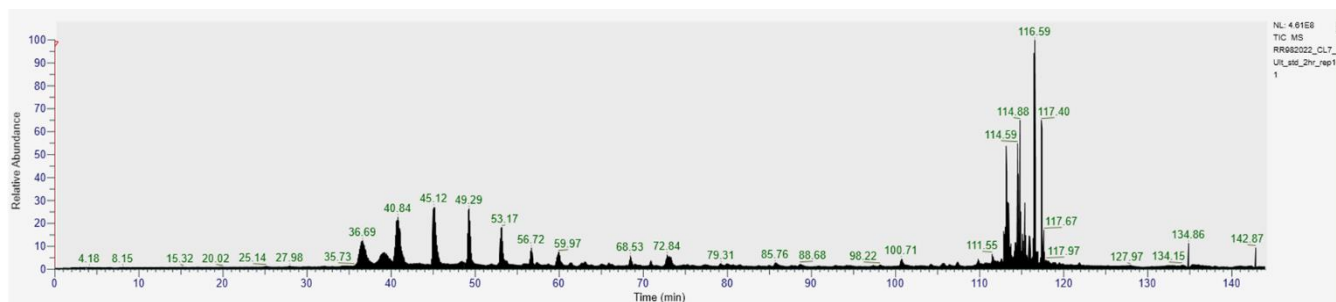

Verofilcon A

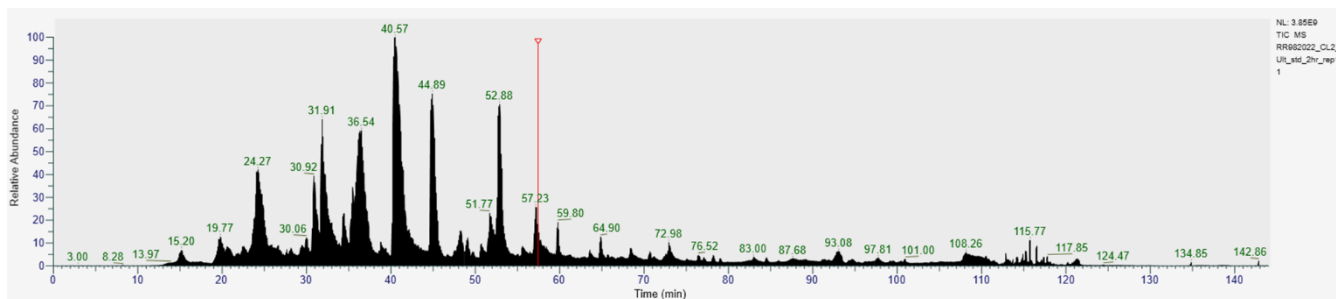

**Supplementary Figure 1.** Polymer contamination in MS by SCL material using the FASP MS sample preparation method. Of the materials tested, only Etafilcon A and Verofilcon A did not show signs of contamination.

**Supplementary Table 1**

*Shapiro-Wilk Data Normality Tests for Proteins Sampled by SCL and Protein Characteristics Datasets*

| <b>Dataset</b> | <b><sup>1</sup>S-W p-value</b> | <b>Normal Distribution?</b> |
|----------------|--------------------------------|-----------------------------|
| Balafilcon A   | 1.72706E-12                    | No                          |
| Comfilcon A    | 2.62635E-16                    | No                          |
| Delefilcon A   | 7.52941E-17                    | No                          |
| Etafilcon A    | 1.89763E-16                    | No                          |
| Lotrafilcon B  | 2.84636E-16                    | No                          |
| Nelfilcon A    | 1.82684E-16                    | No                          |
| Nesofilcon A   | 2.20486E-16                    | No                          |
| Senofilcon A   | 5.115E-16                      | No                          |

|                                      |             |     |
|--------------------------------------|-------------|-----|
| Verofilcon A                         | 2.72331E-16 | No  |
| Aromaticity                          | 0.226054954 | Yes |
| Charge at pH                         | 7.62771E-25 | No  |
| Gravy                                | 1.87072E-09 | No  |
| Instability index                    | 1.03526E-06 | No  |
| Isoelectric point                    | 4.01664E-14 | No  |
| Molar extinction coefficient         | 9.62623E-32 | No  |
| Molar extinction coefficient reduced | 1.24443E-31 | No  |
| Molecular weight                     | 2.12377E-34 | No  |
| Percent content A                    | 3.89388E-19 | No  |
| Percent content C                    | 1.42923E-23 | No  |
| Percent content D                    | 1.95603E-12 | No  |
| Percent content E                    | 4.79255E-15 | No  |
| Percent content F                    | 3.44806E-08 | No  |
| Percent content G                    | 5.08233E-21 | No  |
| Percent content H                    | 1.60184E-20 | No  |
| Percent content I                    | 0.01387529  | No  |
| Percent content K                    | 1.71234E-18 | No  |
| Percent content L                    | 6.83285E-05 | No  |
| Percent content M                    | 1.092E-12   | No  |
| Percent content N                    | 6.09775E-06 | No  |
| Percent content P                    | 4.43008E-19 | No  |
| Percent content Q                    | 3.87858E-07 | No  |
| Percent content R                    | 4.03475E-08 | No  |
| Percent content S                    | 1.11733E-16 | No  |
| Percent content T                    | 1.55291E-18 | No  |
| Percent content V                    | 0.065682689 | Yes |
| Percent content W                    | 3.41721E-16 | No  |
| Percent content Y                    | 0.000454209 | No  |
| Sequence length                      | 7.79273E-35 | No  |

<sup>1</sup> Shapiro-Wilk p-value

**Supplementary Table 2***Protein Identifications by SCL Material*

| Comfilcon A | Delefilcon A | Etafilcon A | Lotrafilcon B | Nelfilcon A | Nesofilcon A | Senofilcon A | Verofilcon A |
|-------------|--------------|-------------|---------------|-------------|--------------|--------------|--------------|
| P02788      | P02788       | P02788      | P02788        | P02788      | P02788       | P02788       | P02788       |
| P35527      | P35527       | P35527      | P35527        | P35527      | P35527       | P35527       | P35527       |
| P04264      | P04264       | P04264      | P04264        | P04264      | P04264       | P04264       | P04264       |
| P13645      | P13645       | P13645      | P13645        | P13645      | P13645       | P13645       | P13645       |
| P35908      | P35908       | P35908      | P35908        | P35908      | P35908       | P35908       | P35908       |
| P61626      | P61626       | P61626      | P61626        | P61626      | P61626       | P61626       | P61626       |
| P02768      | P02768       | P02768      | P02768        | P02768      | P02768       | P02768       | P02768       |
| P31025      | P31025       | P31025      | P31025        | P31025      | P31025       | P31025       | P31025       |
| P01833      | P01833       | P01833      | P01833        | P01833      | P01833       | P01833       | P01833       |
| P01876      | P01876       | P01876      | P01876        | P01876      | P01876       | P01876       | P01876       |
| P01024      | P01024       | P01024      | P01024        | P01024      | P01024       | P01024       | P01024       |
| P25311      | P25311       | P25311      | P25311        | P25311      | P25311       | P25311       | P25311       |
| P04259      | P04259       | P04259      | P04259        | P04259      | P04259       | P04259       | P04259       |
| P19013      | P19013       | P19013      | P19013        | P19013      | P19013       | P19013       | P19013       |
| P13647      | P13647       | P13647      | P13647        | P13647      | P13647       | P13647       | P13647       |
| P02538      | P02538       | P02538      | P02538        | P02538      | P02538       | P02538       | P02538       |
| P08727      | P08727       | P08727      | P08727        | P08727      | P08727       | P08727       | P08727       |
| P13646      | P13646       | P13646      | P13646        | P13646      | P13646       | P13646       | P13646       |
| P08779      | P08779       | P08779      | P08779        | P08779      | P08779       | P08779       | P08779       |
| P02533      | P02533       | P02533      | P02533        | P02533      | P02533       | P02533       | P02533       |
| Q9UGM3      | Q9UGM3       | Q9UGM3      | Q9UGM3        | Q9UGM3      | Q9UGM3       | Q9UGM3       | Q9UGM3       |
| P02787      | P02787       | P02787      | P02787        | P02787      | P02787       | P02787       | P02787       |
| P0DOX7      | P0DOX7       | P0DOX7      | P0DOX7        | P0DOX7      | P0DOX7       | P0DOX7       | P0DOX7       |
| P98160      | P98160       | P98160      | P98160        | P98160      | P98160       | P98160       | P98160       |
| P60709      | P60709       | P60709      | P60709        | P60709      | P60709       | P60709       | P60709       |
| P63261      | P63261       | P63261      | P63261        | P63261      | P63261       | P63261       | P63261       |

|        |        |        |        |        |        |        |        |
|--------|--------|--------|--------|--------|--------|--------|--------|
| P15924 | P15924 | P15924 | P15924 | P15924 | P15924 | P15924 | P15924 |
| P06733 | P06733 | P06733 | P06733 | P06733 | P06733 | P06733 | P06733 |
| P01036 | P01036 | P01036 | P01036 | P01036 | P01036 | P01036 | P01036 |
| P12273 | P12273 | P12273 | P12273 | P12273 | P12273 | P12273 | P12273 |
| Q13421 | Q13421 | Q13421 | Q13421 | Q13421 | Q13421 | Q13421 | Q13421 |
| P01037 | P01037 | P01037 | P01037 | P01037 | P01037 | P01037 | P01037 |
| P0DOX2 | P0DOX2 | P0DOX2 | P0DOX2 | P0DOX2 | P0DOX2 | P0DOX2 | P0DOX2 |
| P07355 | P07355 | P07355 | P07355 | P07355 | P07355 | P07355 | P07355 |
| P00450 | P00450 | P00450 | P00450 | P00450 | P00450 | P00450 | P00450 |
| P06396 | P06396 | P06396 | P06396 | P06396 | P06396 | P06396 | P06396 |
| P00738 | P00738 | P00738 | P00738 | P00738 | P00738 | P00738 | P00738 |
| P0DOY2 | P0DOY2 | P0DOY2 | P0DOY2 | P0DOY2 | P0DOY2 | P0DOY2 | P0DOY2 |
| B9A064 | B9A064 | B9A064 | B9A064 | B9A064 | B9A064 | B9A064 | B9A064 |
| P0DOX8 | P0DOX8 | P0DOX8 | P0DOX8 | P0DOX8 | P0DOX8 | P0DOX8 | P0DOX8 |
| P0DOX5 | P0DOX5 | P0DOX5 | P0DOX5 | P0DOX5 | P0DOX5 | P0DOX5 | P0DOX5 |
| P10909 | P10909 | P10909 | P10909 | P10909 | P10909 | P10909 | P10909 |
| P08729 | P08729 | P08729 | P08729 | P08729 | P08729 | P08729 | P08729 |
| P04083 | P04083 | P04083 | P04083 | P04083 | P04083 | P04083 | P04083 |
| P60174 | P60174 | P60174 | P60174 | P60174 | P60174 | P60174 | P60174 |
| P14923 | P14923 | P14923 | P14923 | P14923 | P14923 | P14923 | P14923 |
| P00352 | P00352 | P00352 | P00352 | P00352 | P00352 | P00352 | P00352 |
| P01871 | P01871 | P01871 | P01871 | P01871 | P01871 | P01871 | P01871 |
| P14618 | P14618 | P14618 | P14618 | P14618 | P14618 | P14618 | P14618 |
| P05787 | P05787 | P05787 | P05787 | P05787 | P05787 | P05787 | P05787 |
| O75556 | O75556 | O75556 | O75556 | O75556 | O75556 | O75556 | O75556 |
| P30838 | P30838 | P30838 | P30838 | P30838 | P30838 | P30838 | P30838 |
| P0DMV8 | P0DMV8 | P0DMV8 | P0DMV8 | P0DMV8 | P0DMV8 | P0DMV8 | P0DMV8 |
| P0DMV9 | P0DMV9 | P0DMV9 | P0DMV9 | P0DMV9 | P0DMV9 | P0DMV9 | P0DMV9 |
| Q08380 | Q08380 | Q08380 | Q08380 | Q08380 | Q08380 | Q08380 | Q08380 |
| Q16378 | Q16378 | Q16378 | Q16378 | Q16378 | Q16378 | Q16378 | Q16378 |
| Q04695 | Q04695 | Q04695 | Q04695 | Q04695 | Q04695 | Q04695 | Q04695 |
| P68133 | P68133 | P68133 | P68133 | P68133 | P68133 | P68133 | P68133 |
| P68032 | P68032 | P68032 | P68032 | P68032 | P68032 | P68032 | P68032 |

|        |        |        |        |        |        |        |        |
|--------|--------|--------|--------|--------|--------|--------|--------|
| P04792 | P04792 | P04792 | P04792 | P04792 | P04792 | P04792 | P04792 |
| P01009 | P01009 | P01009 | P01009 | P01009 | P01009 | P01009 | P01009 |
| P12035 | P12035 | P12035 | P12035 | P12035 | P12035 | P12035 | P12035 |
| P06702 | P06702 | P06702 | P06702 | P06702 | P06702 | P06702 | P06702 |
| P22079 | P22079 | P22079 | P22079 | P22079 | P22079 | P22079 | P22079 |
| P01859 | P01859 | P01859 | P01859 | P01859 | P01859 | P01859 | P01859 |
| P20061 | P20061 | P20061 | P20061 | P20061 | P20061 | P20061 | P20061 |
| Q02413 | Q02413 | Q02413 | Q02413 | Q02413 | Q02413 | Q02413 | Q02413 |
| P19012 | P19012 | P19012 | P19012 | P19012 | P19012 | P19012 | P19012 |
| P30740 | P30740 | P30740 | P30740 | P30740 | P30740 | P30740 | P30740 |
| P80188 | P80188 | P80188 | P80188 | P80188 | P80188 | P80188 | P80188 |
| Q99935 | Q99935 | Q99935 | Q99935 | Q99935 | Q99935 | Q99935 | Q99935 |
| P04406 | P04406 | P04406 | P04406 | P04406 | P04406 | P04406 | P04406 |
| P03973 | P03973 | P03973 | P03973 | P03973 | P03973 | P03973 | P03973 |
| P98088 | P98088 | P98088 | P98088 | P98088 | P98088 | P98088 | P98088 |
| P14555 | P14555 | P14555 | P14555 | P14555 | P14555 | P14555 | P14555 |
| P01591 | P01591 | P01591 | P01591 | P01591 | P01591 | P01591 | P01591 |
| O95968 | O95968 | O95968 | O95968 | O95968 | O95968 | O95968 | O95968 |
| Q7Z794 | Q7Z794 | Q7Z794 | Q7Z794 | Q7Z794 | Q7Z794 | Q7Z794 | Q7Z794 |
| Q8N1N4 | Q8N1N4 | Q8N1N4 | Q8N1N4 | Q8N1N4 | Q8N1N4 | Q8N1N4 | Q8N1N4 |
| P63104 | P63104 | P63104 | P63104 | P63104 | P63104 | P63104 | P63104 |
| P31944 | P31944 | P31944 | P31944 | P31944 | P31944 | P31944 | P31944 |
| Q96P63 | Q96P63 | Q96P63 | Q96P63 | Q96P63 | Q96P63 | Q96P63 | Q96P63 |
| P09228 | P09228 | P09228 | P09228 | P09228 | P09228 | P09228 | P09228 |
| P09211 | P09211 | P09211 | P09211 | P09211 | P09211 | P09211 | P09211 |
| Q9GZZ8 | Q9GZZ8 | Q9GZZ8 | Q9GZZ8 | Q9GZZ8 | Q9GZZ8 | Q9GZZ8 | Q9GZZ8 |
| P02647 | P02647 | P02647 | P02647 | P02647 | P02647 | P02647 | P02647 |
| Q96DA0 | Q96DA0 | Q96DA0 | Q96DA0 | Q96DA0 | Q96DA0 | Q96DA0 | Q96DA0 |
| P05109 | P05109 | P05109 | P05109 | P05109 | P05109 | P05109 | P05109 |
| P07602 | P07602 | P07602 | P07602 | P07602 | P07602 | P07602 | P07602 |
| P05090 | P05090 | P05090 | P05090 | P05090 | P05090 | P05090 | P05090 |
| P11142 | P11142 | P11142 | P11142 | P11142 | P11142 | P11142 | P11142 |
| Q5D862 | Q5D862 | Q5D862 | Q5D862 | Q5D862 | Q5D862 | Q5D862 | Q5D862 |



|        |        |        |        |        |        |        |        |
|--------|--------|--------|--------|--------|--------|--------|--------|
| P61769 | P61769 | P61769 | P61769 | P61769 | P61769 | P61769 | P61769 |
| Q01469 | Q01469 | Q01469 | Q01469 | Q01469 | Q01469 | Q01469 | Q01469 |
| P34096 | P34096 | P34096 | P34096 | P34096 | P34096 | P34096 | P34096 |
| P07339 | P07339 | P07339 | P07339 | P07339 | P07339 | P07339 | P07339 |
| P30044 | P30044 | P30044 | P30044 | P30044 | P30044 | P30044 | P30044 |
| P04075 | P04075 | P04075 | P04075 | P04075 | P04075 | P04075 | P04075 |
| P31947 | P31947 | P31947 | P31947 | P31947 | P31947 | P31947 | P31947 |
| Q5VTE0 | Q5VTE0 | Q5VTE0 | Q5VTE0 | Q5VTE0 | Q5VTE0 | Q5VTE0 | Q5VTE0 |
| P68104 | P68104 | P68104 | P68104 | P68104 | P68104 | P68104 | P68104 |
| P62937 | P62937 | P62937 | P62937 | P62937 | P62937 | P62937 | P62937 |
| P62805 | P62805 | P62805 | P62805 | P62805 | P62805 | P62805 | P62805 |
| P07737 | P07737 | P07737 | P07737 | P07737 | P07737 | P07737 | P07737 |
| A0M8Q6 | A0M8Q6 | A0M8Q6 | A0M8Q6 | A0M8Q6 | A0M8Q6 | A0M8Q6 | A0M8Q6 |
| Q99456 | Q99456 | Q99456 | Q99456 | Q99456 | Q99456 | Q99456 | Q99456 |
| Q06830 | Q06830 | Q06830 | Q06830 | Q06830 | Q06830 | Q06830 | Q06830 |
| P30086 | P30086 | P30086 | P30086 | P30086 | P30086 | P30086 | P30086 |
|        | Q3SY84 | Q3SY84 | Q3SY84 | Q3SY84 | Q3SY84 | Q3SY84 | Q3SY84 |
| P02545 | P02545 | P02545 | P02545 | P02545 | P02545 | P02545 | P02545 |
| P00338 | P00338 | P00338 | P00338 | P00338 | P00338 | P00338 | P00338 |
| P01034 | P01034 | P01034 | P01034 | P01034 | P01034 | P01034 | P01034 |
| P68363 | P68363 | P68363 | P68363 | P68363 | P68363 | P68363 | P68363 |
| P52209 | P52209 | P52209 | P52209 | P52209 | P52209 | P52209 | P52209 |
| Q8N474 | Q8N474 | Q8N474 | Q8N474 | Q8N474 | Q8N474 | Q8N474 | Q8N474 |
| P01011 | P01011 | P01011 | P01011 | P01011 | P01011 | P01011 | P01011 |
| P17931 | P17931 | P17931 | P17931 | P17931 | P17931 | P17931 | P17931 |
| P01619 | P01619 | P01619 | P01619 | P01619 | P01619 | P01619 | P01619 |
| P11021 | P11021 | P11021 | P11021 | P11021 | P11021 | P11021 | P11021 |
| P00558 | P00558 | P00558 | P00558 | P00558 | P00558 | P00558 | P00558 |
| P07858 | P07858 | P07858 | P07858 | P07858 | P07858 | P07858 | P07858 |
| P29401 | P29401 | P29401 | P29401 | P29401 | P29401 | P29401 | P29401 |
| P80303 | P80303 | P80303 | P80303 | P80303 | P80303 | P80303 | P80303 |
| P15311 | P15311 | P15311 | P15311 | P15311 | P15311 | P15311 | P15311 |
| Q08554 | Q08554 | Q08554 | Q08554 | Q08554 | Q08554 | Q08554 | Q08554 |

|            |            |            |            |            |            |            |            |
|------------|------------|------------|------------|------------|------------|------------|------------|
| Q93079     | Q93079     | Q93079     | Q93079     | Q93079     | Q93079     | Q93079     | Q93079     |
| Q5QNW6     | Q5QNW6     | Q5QNW6     | Q5QNW6     | Q5QNW6     | Q5QNW6     | Q5QNW6     | Q5QNW6     |
| Q99877     | Q99877     | Q99877     | Q99877     | Q99877     | Q99877     | Q99877     | Q99877     |
| O60814     | O60814     | O60814     | O60814     | O60814     | O60814     | O60814     | O60814     |
| P62807     | P62807     | P62807     | P62807     | P62807     | P62807     | P62807     | P62807     |
| P58876     | P58876     | P58876     | P58876     | P58876     | P58876     | P58876     | P58876     |
| Q99880     | Q99880     | Q99880     | Q99880     | Q99880     | Q99880     | Q99880     | Q99880     |
| P57053     | P57053     | P57053     | P57053     | P57053     | P57053     | P57053     | P57053     |
| Q99879     | Q99879     | Q99879     | Q99879     | Q99879     | Q99879     | Q99879     | Q99879     |
| P27797     | P27797     | P27797     | P27797     | P27797     | P27797     | P27797     | P27797     |
| Q6UXB2     | Q6UXB2     | Q6UXB2     | Q6UXB2     | Q6UXB2     | Q6UXB2     | Q6UXB2     | Q6UXB2     |
| A0A0B4J1X5 | A0A0B4J1X5 | A0A0B4J1X5 | A0A0B4J1X5 | A0A0B4J1X5 | A0A0B4J1X5 | A0A0B4J1X5 | A0A0B4J1X5 |
| P06744     | P06744     | P06744     | P06744     | P06744     | P06744     | P06744     | P06744     |
| P05783     | P05783     | P05783     | P05783     | P05783     | P05783     | P05783     | P05783     |
| P01040     | P01040     | P01040     | P01040     | P01040     | P01040     | P01040     | P01040     |
| P40394     | P40394     | P40394     | P40394     | P40394     | P40394     | P40394     | P40394     |
| A0A0B4J1V0 | A0A0B4J1V0 | A0A0B4J1V0 | A0A0B4J1V0 | A0A0B4J1V0 | A0A0B4J1V0 | A0A0B4J1V0 | A0A0B4J1V0 |
| P80748     | P80748     | P80748     | P80748     | P80748     | P80748     | P80748     | P80748     |
| P62979     | P62979     | P62979     | P62979     | P62979     | P62979     | P62979     | P62979     |
| P62987     | P62987     | P62987     | P62987     | P62987     | P62987     | P62987     | P62987     |
| P0CG47     | P0CG47     | P0CG47     | P0CG47     | P0CG47     | P0CG47     | P0CG47     | P0CG47     |
| P0CG48     | P0CG48     | P0CG48     | P0CG48     | P0CG48     | P0CG48     | P0CG48     | P0CG48     |
| P16403     | P16403     | P16403     | P16403     | P16403     | P16403     | P16403     | P16403     |
| P27348     | P27348     | P27348     | P27348     | P27348     | P27348     | P27348     | P27348     |
| P07237     | P07237     | P07237     | P07237     | P07237     | P07237     | P07237     | P07237     |
| P00751     | P00751     | P00751     | P00751     | P00751     | P00751     | P00751     | P00751     |
| P06312     | P06312     | P06312     | P06312     | P06312     | P06312     | P06312     | P06312     |
| P02765     | P02765     | P02765     | P02765     | P02765     | P02765     | P02765     | P02765     |
| P10412     | P10412     | P10412     | P10412     | P10412     | P10412     | P10412     | P10412     |
| P31941     | P31941     | P31941     | P31941     | P31941     | P31941     | P31941     | P31941     |
| P55058     | P55058     | P55058     | P55058     | P55058     | P55058     | P55058     | P55058     |
| P01615     | P01615     | P01615     | P01615     | P01615     | P01615     | P01615     | P01615     |
| A0A075B6P5 | A0A075B6P5 | A0A075B6P5 | A0A075B6P5 | A0A075B6P5 | A0A075B6P5 | A0A075B6P5 | A0A075B6P5 |

|            |            |            |            |            |            |            |            |
|------------|------------|------------|------------|------------|------------|------------|------------|
| P81605     | P81605     | P81605     | P81605     | P81605     | P81605     | P81605     | P81605     |
| P02774     | P02774     | P02774     | P02774     | P02774     | P02774     | P02774     | P02774     |
| P14550     | P14550     | P14550     | P14550     | P14550     | P14550     | P14550     | P14550     |
|            | A0A0B4J1Y9 | A0A0B4J1Y9 | A0A0B4J1Y9 | A0A0B4J1Y9 | A0A0B4J1Y9 | A0A0B4J1Y9 | A0A0B4J1Y9 |
| P32119     | P32119     | P32119     | P32119     | P32119     | P32119     | P32119     | P32119     |
| P26447     | P26447     | P26447     | P26447     | P26447     | P26447     | P26447     | P26447     |
| P31151     | P31151     | P31151     | P31151     | P31151     | P31151     | P31151     | P31151     |
| Q15517     | Q15517     | Q15517     | Q15517     | Q15517     | Q15517     | Q15517     | Q15517     |
| P20930     | P20930     | P20930     | P20930     | P20930     | P20930     | P20930     | P20930     |
| P0DP08     | P0DP08     | P0DP08     | P0DP08     | P0DP08     | P0DP08     | P0DP08     | P0DP08     |
| P01825     | P01825     | P01825     | P01825     | P01825     | P01825     | P01825     | P01825     |
| P0DP07     | P0DP07     | P0DP07     | P0DP07     | P0DP07     | P0DP07     | P0DP07     | P0DP07     |
| A0A0C4DH41 | A0A0C4DH41 | A0A0C4DH41 | A0A0C4DH41 | A0A0C4DH41 | A0A0C4DH41 | A0A0C4DH41 | A0A0C4DH41 |
| P0DP06     | P0DP06     | P0DP06     | P0DP06     | P0DP06     | P0DP06     | P0DP06     | P0DP06     |
| P06331     | P06331     | P06331     | P06331     | P06331     | P06331     | P06331     | P06331     |
| P01824     | P01824     | P01824     | P01824     | P01824     | P01824     | P01824     | P01824     |
| A0A0A0MRZ8 | A0A0A0MRZ8 | A0A0A0MRZ8 | A0A0A0MRZ8 | A0A0A0MRZ8 | A0A0A0MRZ8 | A0A0A0MRZ8 | A0A0A0MRZ8 |
| P04433     | P04433     | P04433     | P04433     | P04433     | P04433     | P04433     | P04433     |
| P31949     | P31949     | P31949     | P31949     | P31949     | P31949     | P31949     | P31949     |
| P60953     | P60953     | P60953     | P60953     | P60953     | P60953     | P60953     | P60953     |
| Q6KB66     | Q6KB66     | Q6KB66     | Q6KB66     | Q6KB66     | Q6KB66     | Q6KB66     | Q6KB66     |
| P10599     | P10599     | P10599     | P10599     | P10599     | P10599     | P10599     | P10599     |
| P40925     | P40925     | P40925     | P40925     | P40925     | P40925     | P40925     | P40925     |
| Q14515     | Q14515     | Q14515     | Q14515     | Q14515     | Q14515     | Q14515     | Q14515     |
| A0A075B6S5 | A0A075B6S5 | A0A075B6S5 | A0A075B6S5 | A0A075B6S5 | A0A075B6S5 | A0A075B6S5 | A0A075B6S5 |
| P01742     | P01742     | P01742     | P01742     | P01742     | P01742     | P01742     | P01742     |
| A0A0C4DH31 | A0A0C4DH31 | A0A0C4DH31 | A0A0C4DH31 | A0A0C4DH31 | A0A0C4DH31 | A0A0C4DH31 | A0A0C4DH31 |
| P23083     | P23083     | P23083     | P23083     | P23083     | P23083     | P23083     | P23083     |
| P07900     | P07900     | P07900     | P07900     | P07900     | P07900     | P07900     | P07900     |
| P84243     | P84243     | P84243     | P84243     | P84243     | P84243     | P84243     | P84243     |
| P01700     | P01700     | P01700     | P01700     | P01700     | P01700     | P01700     | P01700     |
| P23528     | P23528     | P23528     | P23528     | P23528     | P23528     | P23528     | P23528     |
| P21980     | P21980     | P21980     | P21980     | P21980     | P21980     | P21980     | P21980     |

|            |            |            |            |            |            |            |            |
|------------|------------|------------|------------|------------|------------|------------|------------|
| Q09666     | Q09666     | Q09666     | Q09666     | Q09666     | Q09666     | Q09666     | Q09666     |
| P01624     | P01624     | P01624     | P01624     | P01624     | P01624     | P01624     | P01624     |
| P07384     | P07384     | P07384     | P07384     | P07384     | P07384     | P07384     | P07384     |
| Q6UWP8     | Q6UWP8     | Q6UWP8     | Q6UWP8     | Q6UWP8     | Q6UWP8     | Q6UWP8     | Q6UWP8     |
| Q8NBJ4     | Q8NBJ4     | Q8NBJ4     | Q8NBJ4     | Q8NBJ4     | Q8NBJ4     | Q8NBJ4     | Q8NBJ4     |
| P40926     | P40926     | P40926     | P40926     | P40926     | P40926     | P40926     | P40926     |
| P68371     | P68371     | P68371     | P68371     | P68371     | P68371     | P68371     | P68371     |
| A0A0A0MS15 | A0A0A0MS15 | A0A0A0MS15 | A0A0A0MS15 | A0A0A0MS15 | A0A0A0MS15 | A0A0A0MS15 | A0A0A0MS15 |
| P01593     | P01593     | P01593     | P01593     | P01593     | P01593     | P01593     | P01593     |
| P01594     | P01594     | P01594     | P01594     | P01594     | P01594     | P01594     | P01594     |
| P02766     | P02766     | P02766     | P02766     | P02766     | P02766     | P02766     | P02766     |
| Q08188     | Q08188     | Q08188     | Q08188     | Q08188     | Q08188     | Q08188     | Q08188     |
| P05089     | P05089     | P05089     | P05089     | P05089     | P05089     | P05089     | P05089     |
| Q9UBT3     | Q9UBT3     | Q9UBT3     | Q9UBT3     | Q9UBT3     | Q9UBT3     | Q9UBT3     | Q9UBT3     |
| O00584     | O00584     | O00584     | O00584     | O00584     | O00584     | O00584     | O00584     |
|            | A0A0B4J2D9 | A0A0B4J2D9 | A0A0B4J2D9 | A0A0B4J2D9 | A0A0B4J2D9 | A0A0B4J2D9 | A0A0B4J2D9 |
|            | P0DP09     | P0DP09     | P0DP09     | P0DP09     | P0DP09     | P0DP09     | P0DP09     |
| O75874     | O75874     | O75874     | O75874     | O75874     | O75874     | O75874     | O75874     |
| P15814     | P15814     | P15814     | P15814     | P15814     | P15814     | P15814     | P15814     |
| P30085     | P30085     | P30085     | P30085     | P30085     | P30085     | P30085     | P30085     |
| A0A0C4DH34 | A0A0C4DH34 | A0A0C4DH34 | A0A0C4DH34 | A0A0C4DH34 | A0A0C4DH34 | A0A0C4DH34 | A0A0C4DH34 |
| P30101     | P30101     | P30101     | P30101     | P30101     | P30101     | P30101     | P30101     |
| Q14697     | Q14697     | Q14697     | Q14697     | Q14697     | Q14697     | Q14697     | Q14697     |
| P12830     | P12830     | P12830     | P12830     | P12830     | P12830     | P12830     | P12830     |
| Q16651     | Q16651     | Q16651     | Q16651     | Q16651     | Q16651     | Q16651     | Q16651     |
| P13987     | P13987     | P13987     | P13987     | P13987     | P13987     | P13987     | P13987     |
| O43653     | O43653     | O43653     | O43653     | O43653     | O43653     | O43653     | O43653     |
| P02763     | P02763     | P02763     | P02763     | P02763     | P02763     | P02763     | P02763     |
| A0A0B4J1V6 | A0A0B4J1V6 | A0A0B4J1V6 | A0A0B4J1V6 | A0A0B4J1V6 | A0A0B4J1V6 | A0A0B4J1V6 | A0A0B4J1V6 |
| O43852     | O43852     | O43852     | O43852     | O43852     | O43852     | O43852     | O43852     |
| P08758     | P08758     | P08758     | P08758     | P08758     | P08758     | P08758     | P08758     |
| Q5T749     | Q5T749     | Q5T749     | Q5T749     | Q5T749     | Q5T749     | Q5T749     | Q5T749     |
| Q7Z5P9     | Q7Z5P9     | Q7Z5P9     | Q7Z5P9     | Q7Z5P9     | Q7Z5P9     | Q7Z5P9     | Q7Z5P9     |

|            |            |            |            |            |            |            |            |
|------------|------------|------------|------------|------------|------------|------------|------------|
| P01714     | P01714     | P01714     | P01714     | P01714     | P01714     | P01714     | P01714     |
| P01717     | P01717     | P01717     | P01717     | P01717     | P01717     | P01717     | P01717     |
| A0A075B6K4 | A0A075B6K4 | A0A075B6K4 | A0A075B6K4 | A0A075B6K4 | A0A075B6K4 | A0A075B6K4 | A0A075B6K4 |
| P23284     | P23284     | P23284     | P23284     | P23284     | P23284     | P23284     | P23284     |
| P12814     | P12814     | P12814     | P12814     | P12814     | P12814     | P12814     | P12814     |
|            | P40199     | P40199     | P40199     | P40199     | P40199     | P40199     | P40199     |
| Q02818     | Q02818     | Q02818     | Q02818     | Q02818     | Q02818     | Q02818     | Q02818     |
| P49788     | P49788     | P49788     | P49788     | P49788     | P49788     | P49788     | P49788     |
| P06703     | P06703     | P06703     | P06703     | P06703     | P06703     | P06703     | P06703     |
| P16401     | P16401     | P16401     | P16401     | P16401     | P16401     | P16401     | P16401     |
| O60437     | O60437     | O60437     | O60437     | O60437     | O60437     | O60437     | O60437     |
| P47929     | P47929     | P47929     | P47929     | P47929     | P47929     | P47929     | P47929     |
| Q14508     | Q14508     | Q14508     | Q14508     | Q14508     | Q14508     | Q14508     | Q14508     |
|            | Q13835     | Q13835     | Q13835     | Q13835     | Q13835     | Q13835     | Q13835     |
| P02750     | P02750     | P02750     | P02750     | P02750     | P02750     | P02750     | P02750     |
| P21926     | P21926     | P21926     | P21926     | P21926     | P21926     | P21926     | P21926     |
|            | P19961     | P19961     | P19961     | P19961     | P19961     | P19961     | P19961     |
|            | P0DTE7     | P0DTE7     | P0DTE7     | P0DTE7     | P0DTE7     | P0DTE7     | P0DTE7     |
|            | P04746     | P04746     | P04746     | P04746     | P04746     | P04746     | P04746     |
|            | P04745     | P04745     | P04745     | P04745     | P04745     | P04745     | P04745     |
|            | P0DTE8     | P0DTE8     | P0DTE8     | P0DTE8     | P0DTE8     | P0DTE8     | P0DTE8     |
| Q9UBC9     | Q9UBC9     | Q9UBC9     | Q9UBC9     | Q9UBC9     | Q9UBC9     | Q9UBC9     | Q9UBC9     |
| Q96QA5     | Q96QA5     | Q96QA5     | Q96QA5     | Q96QA5     | Q96QA5     | Q96QA5     | Q96QA5     |
|            | Q13296     | Q13296     | Q13296     | Q13296     | Q13296     | Q13296     | Q13296     |
|            | Q14002     | Q14002     | Q14002     | Q14002     | Q14002     | Q14002     | Q14002     |
| P62753     | P62753     | P62753     | P62753     | P62753     | P62753     | P62753     | P62753     |
| P09429     | P09429     | P09429     | P09429     | P09429     | P09429     | P09429     | P09429     |
| P83731     | P83731     | P83731     | P83731     | P83731     | P83731     | P83731     | P83731     |
| Q96S96     | Q96S96     | Q96S96     | Q96S96     | Q96S96     | Q96S96     | Q96S96     | Q96S96     |
|            | Q5SNV9     | Q5SNV9     | Q5SNV9     | Q5SNV9     | Q5SNV9     | Q5SNV9     | Q5SNV9     |
|            | Q6ZR08     | Q6ZR08     | Q6ZR08     | Q6ZR08     | Q6ZR08     | Q6ZR08     | Q6ZR08     |
|            | P07910     | P07910     | P07910     | P07910     | P07910     | P07910     | P07910     |
|            | Q9UKZ1     | Q9UKZ1     | Q9UKZ1     | Q9UKZ1     | Q9UKZ1     | Q9UKZ1     | Q9UKZ1     |

|        |            |            |            |            |            |            |            |
|--------|------------|------------|------------|------------|------------|------------|------------|
| P20933 | P20933     | P20933     | P20933     | P20933     | P20933     | P20933     | P20933     |
|        | Q8IZL8     | Q8IZL8     | Q8IZL8     | Q8IZL8     | Q8IZL8     | Q8IZL8     | Q8IZL8     |
|        | P00505     | P00505     | P00505     | P00505     | P00505     | P00505     | P00505     |
|        |            | P48634     |            | P48634     |            | P48634     |            |
|        | Q96G74     | Q96G74     | Q96G74     | Q96G74     | Q96G74     | Q96G74     | Q96G74     |
|        | Q8IVF2     | Q8IVF2     | Q8IVF2     | Q8IVF2     | Q8IVF2     | Q8IVF2     | Q8IVF2     |
|        | Q8TF72     | Q8TF72     | Q8TF72     | Q8TF72     | Q8TF72     | Q8TF72     | Q8TF72     |
|        | Q14966     | Q14966     | Q14966     | Q14966     | Q14966     | Q14966     | Q14966     |
|        | Q7LBE3     | Q7LBE3     | Q7LBE3     | Q7LBE3     | Q7LBE3     | Q7LBE3     | Q7LBE3     |
|        | A6NKD9     | A6NKD9     | A6NKD9     | A6NKD9     | A6NKD9     | A6NKD9     | A6NKD9     |
|        | A0A0B4J1U7 | A0A0B4J1U7 | A0A0B4J1U7 | A0A0B4J1U7 | A0A0B4J1U7 | A0A0B4J1U7 | A0A0B4J1U7 |
|        |            | Q6PID8     |            | Q6PID8     |            | Q6PID8     |            |
| Q99574 | Q99574     | Q99574     | Q99574     | Q99574     | Q99574     | Q99574     | Q99574     |
|        | Q14526     | Q14526     | Q14526     | Q14526     | Q14526     | Q14526     | Q14526     |
|        | Q5VSY0     | Q5VSY0     | Q5VSY0     | Q5VSY0     | Q5VSY0     | Q5VSY0     | Q5VSY0     |
|        | Q8TCU6     | Q8TCU6     | Q8TCU6     | Q8TCU6     | Q8TCU6     | Q8TCU6     | Q8TCU6     |
|        | Q7Z2W7     | Q7Z2W7     | Q7Z2W7     | Q7Z2W7     | Q7Z2W7     | Q7Z2W7     | Q7Z2W7     |
|        | Q14106     | Q14106     | Q14106     | Q14106     | Q14106     | Q14106     | Q14106     |
|        | Q9GZQ3     | Q9GZQ3     | Q9GZQ3     | Q9GZQ3     | Q9GZQ3     | Q9GZQ3     | Q9GZQ3     |
|        | Q8NHQ8     | Q8NHQ8     | Q8NHQ8     | Q8NHQ8     | Q8NHQ8     | Q8NHQ8     | Q8NHQ8     |
|        | P01703     | P01703     | P01703     | P01703     | P01703     | P01703     | P01703     |
|        | O75882     | O75882     | O75882     | O75882     | O75882     | O75882     | O75882     |
|        | O60902     | O60902     | O60902     | O60902     | O60902     | O60902     | O60902     |
| Q5VSP4 | Q5VSP4     | Q5VSP4     | Q5VSP4     | Q5VSP4     | Q5VSP4     | Q5VSP4     | Q5VSP4     |
| P01861 | P01861     | P01861     | P01861     | P01861     | P01861     | P01861     | P01861     |
| O95678 | O95678     | O95678     | O95678     | O95678     | O95678     | O95678     | O95678     |
| P0DOX6 | P0DOX6     | P0DOX6     | P0DOX6     | P0DOX6     | P0DOX6     | P0DOX6     | P0DOX6     |
| Q86YZ3 | Q86YZ3     | Q86YZ3     | Q86YZ3     | Q86YZ3     | Q86YZ3     | Q86YZ3     | Q86YZ3     |
| Q14525 | Q14525     | Q14525     | Q14525     | Q14525     | Q14525     | Q14525     | Q14525     |
| Q562R1 | Q562R1     | Q562R1     | Q562R1     | Q562R1     | Q562R1     | Q562R1     | Q562R1     |
| P31946 | P31946     | P31946     | P31946     | P31946     | P31946     | P31946     | P31946     |
| Q7Z3Y8 | Q7Z3Y8     | Q7Z3Y8     | Q7Z3Y8     | Q7Z3Y8     | Q7Z3Y8     | Q7Z3Y8     | Q7Z3Y8     |
| P01780 | P01780     | P01780     | P01780     | P01780     | P01780     | P01780     | P01780     |

|            |            |            |            |            |            |            |            |
|------------|------------|------------|------------|------------|------------|------------|------------|
| A0A0J9YX35 | A0A0J9YX35 | A0A0J9YX35 | A0A0J9YX35 | A0A0J9YX35 | A0A0J9YX35 | A0A0J9YX35 | A0A0J9YX35 |
| A0A0J9YXX1 | A0A0J9YXX1 | A0A0J9YXX1 | A0A0J9YXX1 | A0A0J9YXX1 | A0A0J9YXX1 | A0A0J9YXX1 | A0A0J9YXX1 |
| A0A0C4DH38 | A0A0C4DH38 | A0A0C4DH38 | A0A0C4DH38 | A0A0C4DH38 | A0A0C4DH38 | A0A0C4DH38 | A0A0C4DH38 |
| P28799     | P28799     | P28799     | P28799     | P28799     | P28799     | P28799     | P28799     |
| P01762     | P01762     | P01762     | P01762     | P01762     | P01762     | P01762     | P01762     |
| Q7Z3Y9     | Q7Z3Y9     | Q7Z3Y9     | Q7Z3Y9     | Q7Z3Y9     | Q7Z3Y9     | Q7Z3Y9     | Q7Z3Y9     |
| Q15149     | Q15149     | Q15149     | Q15149     | Q15149     | Q15149     | Q15149     | Q15149     |
| Q7Z406     | Q7Z406     | Q7Z406     | Q7Z406     | Q7Z406     | Q7Z406     | Q7Z406     | Q7Z406     |
| P06731     | P06731     | P06731     | P06731     | P06731     | P06731     | P06731     | P06731     |
| P04632     | P04632     | P04632     | P04632     | P04632     | P04632     | P04632     | P04632     |
| Q07666     | Q07666     | Q07666     | Q07666     | Q07666     | Q07666     | Q07666     | Q07666     |
|            | O60716     | O60716     | O60716     | O60716     | O60716     | O60716     | O60716     |
| P01611     | P01611     | P01611     | P01611     | P01611     | P01611     | P01611     | P01611     |
| A0A0C4DH72 | A0A0C4DH72 | A0A0C4DH72 | A0A0C4DH72 | A0A0C4DH72 | A0A0C4DH72 | A0A0C4DH72 | A0A0C4DH72 |
| P08246     | P08246     | P08246     | P08246     | P08246     | P08246     | P08246     | P08246     |
| A0A075B6R9 | A0A075B6R9 | A0A075B6R9 | A0A075B6R9 | A0A075B6R9 | A0A075B6R9 | A0A075B6R9 | A0A075B6R9 |
| A0A0C4DH68 | A0A0C4DH68 | A0A0C4DH68 | A0A0C4DH68 | A0A0C4DH68 | A0A0C4DH68 | A0A0C4DH68 | A0A0C4DH68 |
| P40121     | P40121     | P40121     | P40121     | P40121     | P40121     | P40121     | P40121     |
|            | O76021     | O76021     | O76021     | O76021     | O76021     | O76021     | O76021     |
| A0A075B6H7 | A0A075B6H7 | A0A075B6H7 | A0A075B6H7 | A0A075B6H7 | A0A075B6H7 | A0A075B6H7 | A0A075B6H7 |
| P42357     | P42357     | P42357     | P42357     |            | P42357     | P42357     | P42357     |
| P13797     | P13797     | P13797     | P13797     | P13797     | P13797     | P13797     | P13797     |
| P04211     | P04211     | P04211     | P04211     | P04211     | P04211     | P04211     | P04211     |
| A0A075B6I9 | A0A075B6I9 | A0A075B6I9 | A0A075B6I9 | A0A075B6I9 | A0A075B6I9 | A0A075B6I9 | A0A075B6I9 |
| P55064     | P55064     | P55064     | P55064     | P55064     | P55064     | P55064     | P55064     |
| P07951     | P07951     | P07951     | P07951     | P07951     | P07951     | P07951     | P07951     |
| P09493     | P09493     | P09493     | P09493     | P09493     | P09493     | P09493     | P09493     |
| P22735     | P22735     | P22735     | P22735     | P22735     | P22735     | P22735     | P22735     |
| P01701     | P01701     | P01701     | P01701     | P01701     | P01701     | P01701     | P01701     |
| P49840     | P49840     | P49840     | P49840     | P49840     | P49840     | P49840     | P49840     |
| P0DOX3     | P0DOX3     | P0DOX3     | P0DOX3     | P0DOX3     | P0DOX3     | P0DOX3     | P0DOX3     |
|            | P10809     | P10809     | P10809     | P10809     | P10809     | P10809     | P10809     |
| P02679     | P02679     | P02679     | P02679     | P02679     | P02679     | P02679     | P02679     |

|            |            |            |            |            |            |            |            |
|------------|------------|------------|------------|------------|------------|------------|------------|
| Q9UPP2     | Q9UPP2     | Q9UPP2     | Q9UPP2     | Q9UPP2     | Q9UPP2     | Q9UPP2     | Q9UPP2     |
| A0A075B6I0 | A0A075B6I0 | A0A075B6I0 | A0A075B6I0 | A0A075B6I0 | A0A075B6I0 | A0A075B6I0 | A0A075B6I0 |
| Q86V81     | Q86V81     | Q86V81     | Q86V81     | Q86V81     | Q86V81     | Q86V81     | Q86V81     |
| P22681     | P22681     | P22681     | P22681     | P22681     | P22681     | P22681     | P22681     |
|            | Q9BVC4     |            |            |            |            |            |            |
| Q9BWS9     | Q9BWS9     |            | Q9BWS9     | Q9BWS9     | Q9BWS9     |            |            |
| Q7RTR2     | Q7RTR2     | Q7RTR2     | Q7RTR2     | Q7RTR2     | Q7RTR2     | Q7RTR2     | Q7RTR2     |
| Q8N6G6     | Q8N6G6     | Q8N6G6     | Q8N6G6     | Q8N6G6     | Q8N6G6     | Q8N6G6     | Q8N6G6     |
| P67809     | P67809     | P67809     | P67809     | P67809     | P67809     | P67809     | P67809     |
| Q8IZ21     | Q8IZ21     | Q8IZ21     | Q8IZ21     | Q8IZ21     | Q8IZ21     | Q8IZ21     | Q8IZ21     |
|            |            | Q8WXS5     |            |            |            |            |            |
| Q9ULD2     | Q9ULD2     | Q9ULD2     | Q9ULD2     | Q9ULD2     | Q9ULD2     | Q9ULD2     | Q9ULD2     |
| Q86SM8     | Q86SM8     | Q86SM8     | Q86SM8     | Q86SM8     | Q86SM8     | Q86SM8     | Q86SM8     |
|            | Q13283     | Q13283     | Q13283     | Q13283     | Q13283     | Q13283     | Q13283     |
| Q9NSA2     | Q9NSA2     | Q9NSA2     | Q9NSA2     |            | Q9NSA2     | Q9NSA2     | Q9NSA2     |
| Q15323     | Q15323     | Q15323     | Q15323     |            | Q15323     | Q15323     | Q15323     |
| O43790     | O43790     | O43790     | O43790     |            | O43790     | O43790     | O43790     |
| Q14533     | Q14533     | Q14533     | Q14533     |            | Q14533     | Q14533     | Q14533     |
| P62258     | P62258     | P62258     | P62258     |            | P62258     | P62258     | P62258     |
| Q13228     | Q13228     | Q13228     | Q13228     |            | Q13228     | Q13228     | Q13228     |
| P78386     | P78386     | P78386     | P78386     |            | P78386     | P78386     | P78386     |
| P13929     | P13929     | P13929     | P13929     |            | P13929     | P13929     | P13929     |
| A0A0C4DH42 | A0A0C4DH42 | A0A0C4DH42 | A0A0C4DH42 |            | A0A0C4DH42 | A0A0C4DH42 | A0A0C4DH42 |
| P02790     | P02790     | P02790     | P02790     |            | P02790     | P02790     | P02790     |
| P22392     | P22392     | P22392     | P22392     |            | P22392     | P22392     | P22392     |
| P37802     | P37802     | P37802     | P37802     |            | P37802     | P37802     | P37802     |
| P29508     | P29508     | P29508     | P29508     |            | P29508     | P29508     | P29508     |
| P18510     | P18510     | P18510     | P18510     |            | P18510     | P18510     | P18510     |
| P30041     | P30041     | P30041     | P30041     |            | P30041     | P30041     | P30041     |
| P15259     | P15259     | P15259     | P15259     |            | P15259     | P15259     | P15259     |
| P18669     | P18669     | P18669     | P18669     |            | P18669     | P18669     | P18669     |
| P48594     | P48594     | P48594     | P48594     |            | P48594     | P48594     | P48594     |
| P0DP24     | P0DP24     | P0DP24     | P0DP24     |            | P0DP24     | P0DP24     | P0DP24     |



|            |            |            |            |            |            |            |
|------------|------------|------------|------------|------------|------------|------------|
| P0DP23     | P0DP23     | P0DP23     | P0DP23     | P0DP23     | P0DP23     | P0DP23     |
| P0DP25     | P0DP25     | P0DP25     | P0DP25     | P0DP25     | P0DP25     | P0DP25     |
| P05387     | P05387     | P05387     | P05387     | P05387     | P05387     | P05387     |
| P04080     | P04080     | P04080     | P04080     | P04080     | P04080     | P04080     |
| P22626     | P22626     | P22626     | P22626     | P22626     | P22626     | P22626     |
| O75223     | O75223     | O75223     | O75223     | O75223     | O75223     | O75223     |
| P37837     | P37837     | P37837     | P37837     | P37837     | P37837     | P37837     |
| P27482     | P27482     | P27482     | P27482     | P27482     | P27482     | P27482     |
| O00299     | O00299     | O00299     | O00299     | O00299     | O00299     | O00299     |
| P08582     | P08582     | P08582     | P08582     | P08582     | P08582     | P08582     |
|            |            | Q9HC84     | Q9HC84     | Q9HC84     |            |            |
| P0DME0     | P0DME0     | P0DME0     | P0DME0     | P0DME0     | P0DME0     | P0DME0     |
| Q01105     | Q01105     | Q01105     | Q01105     | Q01105     | Q01105     | Q01105     |
| P02511     | P02511     | P02511     | P02511     | P02511     | P02511     | P02511     |
| P01008     | P01008     | P01008     | P01008     | P01008     | P01008     | P01008     |
| P08571     | P08571     | P08571     | P08571     | P08571     | P08571     | P08571     |
| A0A075B6S9 | A0A075B6S9 | A0A075B6S9 | A0A075B6S9 | A0A075B6S9 | A0A075B6S9 | A0A075B6S9 |
| P0DSN7     | P0DSN7     | P0DSN7     | P0DSN7     | P0DSN7     | P0DSN7     | P0DSN7     |
| P06454     | P06454     | P06454     | P06454     | P06454     | P06454     | P06454     |
| P08294     | P08294     | P08294     | P08294     | P08294     | P08294     | P08294     |
| Q9HAV0     | Q9HAV0     | Q9HAV0     | Q9HAV0     | Q9HAV0     | Q9HAV0     | Q9HAV0     |
| P62873     | P62873     | P62873     | P62873     | P62873     | P62873     | P62873     |
| P62879     | P62879     | P62879     | P62879     | P62879     | P62879     | P62879     |
| P16520     | P16520     | P16520     | P16520     | P16520     | P16520     | P16520     |
| P25705     | P25705     | P25705     | P25705     | P25705     | P25705     | P25705     |
| P08670     | P08670     | P08670     | P08670     | P08670     | P08670     | P08670     |
| P61158     | P61158     | P61158     | P61158     | P61158     | P61158     | P61158     |
| Q9H0U4     | Q9H0U4     | Q9H0U4     | Q9H0U4     | Q9H0U4     | Q9H0U4     | Q9H0U4     |
| Q92928     | Q92928     | Q92928     | Q92928     | Q92928     | Q92928     | Q92928     |
| P62820     | P62820     | P62820     | P62820     | P62820     | P62820     | P62820     |
| Q92930     | Q92930     | Q92930     | Q92930     | Q92930     | Q92930     | Q92930     |
| P61026     | P61026     | P61026     | P61026     | P61026     | P61026     | P61026     |
| P59190     | P59190     | P59190     | P59190     | P59190     | P59190     | P59190     |

|        |        |        |        |        |        |        |
|--------|--------|--------|--------|--------|--------|--------|
| Q15286 | Q15286 | Q15286 | Q15286 | Q15286 | Q15286 | Q15286 |
| P51153 | P51153 | P51153 | P51153 | P51153 | P51153 | P51153 |
| P61006 | P61006 | P61006 | P61006 | P61006 | P61006 | P61006 |
| P61160 | P61160 | P61160 | P61160 | P61160 | P61160 | P61160 |
| P06576 | P06576 | P06576 | P06576 | P06576 | P06576 |        |
| P60660 | P60660 | P60660 | P60660 | P60660 | P60660 | P60660 |
| P14649 | P14649 | P14649 | P14649 | P14649 | P14649 | P14649 |
| P05386 | P05386 | P05386 | P05386 | P05386 | P05386 | P05386 |
| Q14764 | Q14764 | Q14764 | Q14764 | Q14764 | Q14764 | Q14764 |
| Q14118 | Q14118 | Q14118 | Q14118 | Q14118 | Q14118 | Q14118 |
| P04217 | P04217 | P04217 | P04217 | P04217 | P04217 | P04217 |
| P36952 | P36952 | P36952 | P36952 | P36952 | P36952 | P36952 |
| Q02809 | Q02809 | Q02809 | Q02809 | Q02809 | Q02809 | Q02809 |
| Q6ZVX7 | Q6ZVX7 | Q6ZVX7 | Q6ZVX7 | Q6ZVX7 | Q6ZVX7 | Q6ZVX7 |
| P14174 | P14174 | P14174 | P14174 | P14174 | P14174 | P14174 |
| Q58FF3 | Q58FF3 | Q58FF3 | Q58FF3 | Q58FF3 | Q58FF3 | Q58FF3 |
| P14625 | P14625 | P14625 | P14625 | P14625 | P14625 | P14625 |
| P25786 | P25786 | P25786 | P25786 | P25786 | P25786 | P25786 |
| O95436 | O95436 | O95436 | O95436 | O95436 | O95436 | O95436 |
| P13489 | P13489 | P13489 | P13489 | P13489 | P13489 | P13489 |
| Q9UL46 | Q9UL46 | Q9UL46 | Q9UL46 | Q9UL46 | Q9UL46 | Q9UL46 |
| P36955 | P36955 | P36955 | P36955 | P36955 | P36955 | P36955 |
| P60981 | P60981 | P60981 | P60981 | P60981 | P60981 | P60981 |
| P62913 | P62913 | P62913 | P62913 | P62913 | P62913 | P62913 |
| O75888 | O75888 | O75888 | O75888 | O75888 | O75888 | O75888 |
| P57723 | P57723 | P57723 | P57723 | P57723 | P57723 | P57723 |
| Q15365 | Q15365 | Q15365 | Q15365 | Q15365 | Q15365 | Q15365 |
| P57721 | P57721 | P57721 | P57721 | P57721 | P57721 | P57721 |
| Q15366 | Q15366 | Q15366 | Q15366 | Q15366 | Q15366 | Q15366 |
| P15309 |        | P15309 | P15309 | P15309 | P15309 | P15309 |
| P62491 | P62491 | P62491 | P62491 | P62491 | P62491 | P62491 |
| Q15907 | Q15907 | Q15907 | Q15907 | Q15907 | Q15907 | Q15907 |
| Q13867 | Q13867 | Q13867 | Q13867 | Q13867 | Q13867 | Q13867 |

|        |        |        |        |        |        |        |
|--------|--------|--------|--------|--------|--------|--------|
| P33241 | P33241 | P33241 | P33241 | P33241 | P33241 | P33241 |
| P27635 | P27635 | P27635 | P27635 | P27635 | P27635 | P27635 |
| O75083 | O75083 | O75083 | O75083 | O75083 | O75083 | O75083 |
| P09467 | P09467 | P09467 | P09467 | P09467 | P09467 | P09467 |
| P02452 |        |        |        |        |        |        |
| P18124 | P18124 | P18124 | P18124 | P18124 | P18124 | P18124 |
| P62899 | P62899 | P62899 | P62899 | P62899 | P62899 | P62899 |
| P25789 | P25789 | P25789 | P25789 | P25789 | P25789 | P25789 |
| Q9UN76 | Q9UN76 | Q9UN76 | Q9UN76 | Q9UN76 | Q9UN76 | Q9UN76 |
| P06748 | P06748 | P06748 | P06748 | P06748 | P06748 | P06748 |
| O43516 | O43516 | O43516 | O43516 | O43516 | O43516 | O43516 |
| Q99497 | Q99497 | Q99497 | Q99497 | Q99497 | Q99497 | Q99497 |
| Q86X10 | Q86X10 | Q86X10 |        | Q86X10 |        |        |
| P40939 | P40939 | P40939 | P40939 | P40939 | P40939 | P40939 |
| P09668 | P09668 | P09668 | P09668 | P09668 | P09668 | P09668 |
| O14497 | O14497 | O14497 | O14497 | O14497 | O14497 | O14497 |
| Q13200 | Q13200 | Q13200 | Q13200 | Q13200 | Q13200 | Q13200 |
| Q96SC8 | Q96SC8 | Q96SC8 | Q96SC8 | Q96SC8 | Q96SC8 | Q96SC8 |
| Q14574 | Q14574 | Q14574 | Q14574 | Q14574 | Q14574 | Q14574 |
| Q9UPN9 | Q9UPN9 | Q9UPN9 | Q9UPN9 | Q9UPN9 | Q9UPN9 | Q9UPN9 |
| P08174 | P08174 | P08174 | P08174 | P08174 | P08174 | P08174 |
| P06727 |        | P06727 | P06727 | P06727 | P06727 | P06727 |
|        |        | Q5T1R4 |        |        |        |        |
| Q96JM2 | Q96JM2 | Q96JM2 | Q96JM2 | Q96JM2 | Q96JM2 | Q96JM2 |
| Q96RY5 | Q96RY5 | Q96RY5 | Q96RY5 | Q96RY5 | Q96RY5 | Q96RY5 |
| P04179 | P04179 | P04179 | P04179 | P04179 | P04179 | P04179 |

All proteins are listed by their Uniprot Accession

### Supplementary Table 3

*Protein Identifications by Subject*

**Subject 1**

| Totals             | 0                | 275             | 280              | 277             | 279               | 277             | 279              | 273              | 278              |
|--------------------|------------------|-----------------|------------------|-----------------|-------------------|-----------------|------------------|------------------|------------------|
| Accession          | Balafilco<br>n A | Comfilco<br>n A | Delefilco<br>n A | Etafilco<br>n A | Lotrafilco<br>n B | Nelfilco<br>n A | Nesofilco<br>n A | Senofilco<br>n A | Verofilco<br>n A |
| P02788 TRFL_HUMAN  |                  | 5.690724        | 4.871878         | 4.97116         | 5.147946          | 4.72981         | 4.194721         | 5.29558          | 7.346494         |
| P35527 K1C9_HUMAN  |                  | 2.640408        | 2.653632         | 2.50022         | 2.682099          | 2.61887         | 2.715624         | 2.696039         | 2.639785         |
| P04264 K2C1_HUMAN  |                  | 3.655624        | 3.261086         | 3.11381         | 3.413111          | 3.58311         | 3.166784         | 3.271805         | 3.393056         |
| P13645 K1C10_HUMAN |                  | 2.472302        | 1.775869         | 1.55817         | 2.033123          | 2.57490         | 1.281023         | 1.943836         | 2.087936         |
| P35908 K22E_HUMAN  |                  | 1.896558        | 1.339147         | 1.06062         | 1.916443          | 2.28669         | 0.769479         | 1.607368         | 1.54259          |
| P61626 LYSC_HUMAN  |                  | 6.122913        | 6.120219         | 7.93663         | 5.045267          | 5.64928         | 6.657784         | 5.443738         | 7.725464         |
| P02768 ALBU_HUMAN  | 2.994            | 2.866583        | 2.94702          | 4.59940         | 3.733974          | 3.37581         | 2.488064         | 3.027271         | 4.047957         |
| P31025 LCN1_HUMAN  | 4.804439         | 4.450895        | 0.79040          | 2               | 4.515453          | 4.32522         | 3.899687         | 4.338181         | 4.429633         |
| P01833 PIGR_HUMAN  | 1.169388         | 0.463922        | 0.30590          | 6               | 0.768693          | 1.55615         | 0.252294         | 0.244853         | 1.263555         |
| P01876 IGHA1_HUMAN | 0.744885         | 0.058396        | 6                | 6               | 0.463582          | 1.06252         | -0.12497         | -0.2989          | 0.816341         |
| P01024 CO3_HUMAN   | -1.73484         | -2.19835        | -1.79919         | -1.41695        | 0.34289           | -               | -1.90514         | -1.96992         | -1.27763         |
| P25311 ZA2G_HUMAN  | 2.824343         | 2.387976        | 2.35749          | 8               | 2.482827          | 2.80695         | 1.388468         | 2.425736         | 2.806497         |
| P04259 K2C6B_HUMAN | -9.47332         | -10.8151        | -10.2246         | -10.5327        | 9.29973           | -               | -8.34516         |                  | -9.73089         |
| P19013 K2C4_HUMAN  | -0.05136         | -0.04315        | -1.32839         | -0.21754        | 1.40276           | 1               | -0.67122         | -1.10658         | 0.18399          |
| P13647 K2C5_HUMAN  | 0.989055         | 1.01902         | 0.36023          | 9               | 0.811495          | 2.13968         | 0.525628         | 0.412755         | 1.111652         |
| P02538 K2C6A_HUMAN | -6.79927         | -7.08096        | -7.42274         | -8.26161        | 6.37327           | -               | -7.08513         | -8.62578         | -7.41315         |
| P08727 K1C19_HUMAN | -2.09435         | -1.91331        | -2.82852         | -1.80989        | 0.58766           | -               | -2.18012         | -2.7141          | -1.55462         |

|                    |          |          |          |          |         |          |          |          |  |
|--------------------|----------|----------|----------|----------|---------|----------|----------|----------|--|
|                    |          |          |          |          | 0.46899 |          |          |          |  |
| P13646 K1C13_HUMAN | -1.05261 | -0.99042 | -2.36572 | -1.19364 | 6       | -1.5962  | -2.43853 | -0.84505 |  |
| P08779 K1C16_HUMAN | -1.02142 | -1.39949 | -0.98303 | -1.12571 | -0.7594 | -0.52679 | -1.47697 | -0.95396 |  |
|                    |          |          |          |          | -       |          |          |          |  |
| P02533 K1C14_HUMAN | -1.35707 | -1.77041 | -1.85073 | -1.75414 | 1.15355 | -1.77524 | -1.73294 | -1.43775 |  |
|                    |          |          |          |          | -       |          |          |          |  |
| Q9UGM3 DMBT1_HUMAN | -1.85694 | -2.29903 | -2.12636 | -2.11166 | 1.86316 | -2.80307 | -2.58966 | -1.99766 |  |
|                    |          |          | 0.06512  |          | -       |          |          |          |  |
| P02787 TRFE_HUMAN  | -0.41073 | -0.72151 | 9        | -0.16936 | 0.10705 | -0.8272  | -0.43361 | 0.692201 |  |
|                    |          |          |          |          | 0.70348 |          |          |          |  |
| P0DOX7 IGK_HUMAN   | 0.202038 | -0.37487 | -0.07498 | -0.11181 | 2       | -0.59886 | -0.55347 | 0.386494 |  |
|                    |          |          |          |          | -       |          |          |          |  |
| P98160 PGBM_HUMAN  | -3.17445 | -3.32512 | -2.94325 | -3.389   | 2.63392 | -3.98916 | -3.66582 | -3.13169 |  |
|                    |          |          |          |          | -       |          |          |          |  |
| P60709 ACTB_HUMAN  | -2.77477 | -2.98564 | -2.78246 | -2.4187  | 0.39934 | -2.91089 | -3.55801 | -1.91192 |  |
|                    |          |          |          |          | -       |          |          |          |  |
| P63261 ACTG_HUMAN  | -2.77477 | -2.98564 | -2.78246 | -2.4187  | 0.39934 | -2.91089 | -3.55801 | -1.91192 |  |
|                    |          |          |          |          | -       |          |          |          |  |
| P15924 DESP_HUMAN  | -0.23747 | -0.77691 | -0.74279 | -0.49167 | 0.53948 | -0.60928 | -0.78958 | -0.64787 |  |
|                    |          |          |          |          | 1.73539 |          |          |          |  |
| P06733 ENOA_HUMAN  | -1.07151 | -1.5988  | -1.61221 | -0.8039  | 4       | -1.50819 | -1.12058 | -0.1456  |  |
|                    |          |          | 0.63512  |          |         |          |          |          |  |
| P01036 CYTS_HUMAN  | 0.974397 | 0.494677 | 9        | 0.651335 | 0.94984 | 1.078228 | 0.281506 | 1.127429 |  |
|                    |          |          | 2.04842  |          | 2.28896 |          |          |          |  |
| P12273 PIP_HUMAN   | 2.299667 | 2.044471 | 6        | 2.170166 | 8       | 1.025234 | 1.844631 | 2.492993 |  |
|                    |          |          |          |          | -       |          |          |          |  |
| Q13421 MSLN_HUMAN  | -6.20067 | -6.48875 | -5.96648 | -5.99726 | 5.57447 | -6.98327 | -6.54741 | -5.65453 |  |
|                    |          |          | 0.33558  |          | 0.55461 |          |          |          |  |
| P01037 CYTN_HUMAN  | 0.28956  | -0.20532 | 6        | -0.33806 | 5       | 1.42066  | -0.48346 | 0.884203 |  |
|                    |          |          |          |          | -       |          |          |          |  |
| P0DOX2 IGA2_HUMAN  | -4.27794 | -4.85752 | -4.70455 | -4.82345 | 3.70246 | -5.26845 | -5.23179 | -3.99639 |  |
|                    |          |          |          |          | 0.54035 |          |          |          |  |
| P07355 ANXA2_HUMAN | -0.53242 | -0.99659 | -1.16652 | -0.6605  | 6       | -1.39075 | -1.2241  | 0.639059 |  |
|                    |          |          |          |          | -       |          |          |          |  |
| P00450 CERU_HUMAN  | -3.55573 | -3.61227 | -3.26985 | -3.64878 | 2.81314 | -3.79041 | -3.84061 | -2.85352 |  |
|                    |          |          |          |          | -       |          |          |          |  |
| P06396 GELS_HUMAN  | -1.98107 | -2.21835 | -2.00675 | -1.5941  | 0.35907 | -2.30329 | -2.52792 | -1.40071 |  |

|                    |          |          |          |          |         |          |          |          |  |
|--------------------|----------|----------|----------|----------|---------|----------|----------|----------|--|
|                    |          |          |          |          | 0.30799 |          |          |          |  |
| P00738 HPT_HUMAN   | 0.426634 | -0.11363 | 0.20588  | -0.00042 | 2       | -1.0426  | 0.066075 | 0.187686 |  |
| P0DOY2 IGLC2_HUMAN | -3.89535 | -4.60487 | -4.43465 | -4.1614  | -3.2187 | -4.7109  | -4.65177 | -3.96852 |  |
|                    |          |          |          |          | -       |          |          |          |  |
| B9A064 IGLL5_HUMAN | -2.67315 | -3.35344 | -3.17717 | -3.05307 | 2.16989 | -3.51421 | -3.57848 | -2.67707 |  |
|                    |          |          |          |          | -       |          |          |          |  |
| P0DOX8 IGL1_HUMAN  | -2.67315 | -3.35344 | -3.17717 | -3.05307 | 2.16989 | -3.51421 | -3.57848 | -2.67707 |  |
|                    |          |          |          |          | -       |          |          |          |  |
| P0DOX5 IGG1_HUMAN  | -2.18369 | -2.35972 | -0.94885 | -2.59593 | 1.72468 | -2.02135 | -2.32062 | -0.95108 |  |
|                    |          |          |          |          | -       |          |          |          |  |
| P10909 CLUS_HUMAN  | -1.37049 | -1.59956 | -1.46922 | -1.48503 | 0.43213 | -2.22025 | -1.80876 | -1.44033 |  |
|                    |          |          |          |          | -       |          |          |          |  |
| P08729 K2C7_HUMAN  | -5.93867 | -5.49625 | -6.42654 | -5.0507  | 4.03791 | -5.3867  | -6.26519 | -4.4809  |  |
|                    |          |          |          |          | -       |          |          |          |  |
| P04083 ANXA1_HUMAN | -1.38156 | -1.76514 | -1.9269  | -1.13614 | 0.40493 | -1.88704 | -2.32835 | -0.72259 |  |
|                    |          |          |          |          | -       |          |          |          |  |
| P60174 TPIS_HUMAN  | -3.5366  | -3.80917 | -3.90167 | -3.44593 | 1.46896 | -4.05468 | -3.88457 | -2.76901 |  |
|                    |          |          |          |          | -       |          |          |          |  |
| P14923 PLAK_HUMAN  | -0.85102 | -1.30489 | -1.18115 | -1.02291 | 0.90492 | -1.23083 | -1.1946  | -1.04739 |  |
| P00352 AL1A1_HUMAN | -6.43791 | -6.34092 | -6.21831 | -5.69049 | -3.2025 | -6.33856 | -6.96144 | -5.14282 |  |
|                    |          |          |          |          | -       |          |          |          |  |
| P01871 IGHM_HUMAN  | -5.54578 | -6.33794 | -6.2071  | -5.79926 | 4.97737 | -6.27174 | -5.51038 | -5.63898 |  |
|                    |          |          |          |          | -       |          |          |          |  |
| P14618 KPYM_HUMAN  | -3.47721 | -4.3375  | -3.53152 | -3.66643 | 1.89729 | -4.48094 | -3.89682 | -3.26555 |  |
|                    |          |          |          |          | -       |          |          |          |  |
| P05787 K2C8_HUMAN  | -3.90425 | -3.56319 | -4.58262 | -3.36624 | 2.38692 | -3.84219 | -4.71206 | -3.02123 |  |
|                    |          |          | 1.57375  |          | -       |          |          |          |  |
| O75556 SG2A1_HUMAN | 0.052594 | -0.64659 | 8        | -0.39696 | 0.03065 | 0.534324 | -0.96893 | -0.29723 |  |
|                    |          |          |          |          | -       |          |          |          |  |
| P30838 AL3A1_HUMAN | -2.88163 | -3.30998 | -2.20401 | -3.30186 | 0.20268 | -3.16961 | -3.29099 | -1.70003 |  |
|                    |          |          |          |          | -       |          |          |          |  |
| P0DMV8 HS71A_HUMAN | -5.17299 | -5.41332 | -5.11104 | -4.1203  | 3.14598 | -5.32743 | -5.67683 | -3.81856 |  |
|                    |          |          |          |          | -       |          |          |          |  |
| P0DMV9 HS71B_HUMAN | -5.17299 | -5.41332 | -5.11104 | -4.1203  | 3.14598 | -5.32743 | -5.67683 | -3.81856 |  |
| Q08380 LG3BP_HUMAN | -1.41392 | -2.06269 | -1.5077  | -1.55367 | -1.1898 | -2.47457 | -1.50929 | -1.42224 |  |
|                    |          |          | 2.76623  |          | 0.99127 |          |          |          |  |
| Q16378 PROL4_HUMAN | 2.126929 | 1.737121 | 5        | 1.765878 | 6       | 1.789382 | 1.570162 | 2.059822 |  |

|                    |          |          |                     |          |         |          |          |          |
|--------------------|----------|----------|---------------------|----------|---------|----------|----------|----------|
| Q04695 K1C17_HUMAN | -3.70758 | -3.98088 | -4.19681            | -4.1619  | 3.85442 | -3.37553 | -4.32075 | -3.7047  |
| P68133 ACTS_HUMAN  | -6.06053 | -5.89285 | -6.45398            | -5.28255 | 3.10777 | -5.88664 | -6.49814 | -4.98677 |
| P68032 ACTC_HUMAN  | -6.06053 | -5.89285 | -6.45398            | -5.28255 | 3.10777 | -5.88664 | -6.49814 | -4.98677 |
| P04792 HSPB1_HUMAN | -2.52593 | -2.62182 | -2.66703            | -0.60574 | 0.43266 | -2.57405 | -2.82838 | -1.6459  |
| P01009 A1AT_HUMAN  | -3.90883 | -4.01937 | -4.33026            | -3.40466 | 3.32414 | -4.50174 | -3.98187 | -2.9635  |
| P12035 K2C3_HUMAN  | -4.56971 | -5.20682 | -4.13358            | -3.68782 | 7.44879 | -5.73756 | -5.58615 | -3.95074 |
| P06702 S10A9_HUMAN | -1.33814 | -1.94195 | -2.64455            | -1.46112 | 0.02424 | -2.13426 | -2.4551  | -0.96274 |
| P22079 PERL_HUMAN  | -1.84745 | -2.26613 | -2.07111            | -2.20279 | 1.96242 | -3.08691 | -2.48045 | -1.14724 |
| P01859 IGHG2_HUMAN | -4.52429 | -5.03471 | -4.87573            | -4.52997 | 3.58385 | -5.16534 | -4.50471 | -4.17109 |
| P20061 TCO1_HUMAN  | -3.07965 | -3.3543  | -3.14413            | -3.2593  | 2.82857 | -3.85707 | -3.52066 | -2.70914 |
| Q02413 DSG1_HUMAN  | -2.00707 | -2.60048 | -2.13757            | -2.31299 | 2.56814 | -2.77426 | -2.44333 | -1.9919  |
| P19012 K1C15_HUMAN | -9.72751 | -9.43751 |                     | -9.19824 | 8.12715 | -9.50229 |          | -8.71101 |
| P30740 ILEU_HUMAN  | -3.16718 | -3.54897 | -3.38423            | -2.95012 | 1.04522 | -3.65465 | -3.84648 | -2.13675 |
| P80188 NGAL_HUMAN  | -2.06072 | -2.36404 | -2.36524            | -1.53363 | 0.97769 | -2.10894 | -2.22978 | -1.36809 |
| Q99935 PROL1_HUMAN | -0.59318 | -0.68125 | -0.45332            | 0.46195  | 0.11033 | -1.42781 | -1.26743 | -0.90342 |
| P04406 G3P_HUMAN   | -1.65444 | -2.47494 | -2.43731            | -2.01191 | 0.10726 | -2.7829  | -2.1044  | -1.2342  |
| P03973 SLPI_HUMAN  | 0.9309   | 1.128068 | 2.94773<br>4        | 0.098507 | 0.22618 | 1.264906 | 0.230864 | 0.879523 |
| P98088 MUC5A_HUMAN | -4.77874 | -6.16876 | -7.15076<br>1.31905 | -5.5338  | 2.91712 | -5.73338 | -7.84162 | -5.03304 |
| P14555 PA2GA_HUMAN | 0.306817 | -0.50239 | 4                   | -0.13116 | 1.08815 | -1.39368 | -1.36248 | -1.78186 |

|                    |          |          |          |          |         |          |          |          |
|--------------------|----------|----------|----------|----------|---------|----------|----------|----------|
| P01591 IGJ_HUMAN   | 1.621904 | 0.863885 | 1.15314  | 1.177101 | 2.07545 | 0.632553 | 0.553693 | 1.581436 |
|                    |          |          | 2.50518  |          | 9       |          |          |          |
| O95968 SG1D1_HUMAN | 1.336028 | 1.081845 | 4        | 1.331934 | 2.02664 | 1.698593 | 0.593965 | 1.324656 |
|                    |          |          |          |          | 2       |          |          |          |
| Q7Z794 K2C1B_HUMAN | -5.18343 | -6.198   | -5.8329  | -5.50669 | 5.30382 | -6.47353 | -5.87595 | -4.58714 |
| Q8N1N4 K2C78_HUMAN | -2.52361 | -2.875   | -3.18508 | -2.7936  | -2.2209 | -3.32568 | -3.00494 | -2.44434 |
|                    |          |          |          |          | -       |          |          |          |
| P63104 1433Z_HUMAN | -3.29073 | -3.57023 | -3.43347 | -2.69514 | 0.65795 | -3.55786 | -3.55193 | -2.08525 |
|                    |          |          |          |          | -       |          |          |          |
| P31944 CASPE_HUMAN | -3.45934 | -4.61478 | -4.25325 | -3.97926 | 3.09797 | -4.76212 | -4.04857 | -3.70049 |
|                    |          |          |          |          | -       |          |          |          |
| Q96P63 SPB12_HUMAN | -3.55018 | -3.87356 | -3.2068  | -4.12846 | 3.83199 | -3.85661 | -3.99138 | -3.25183 |
|                    |          |          |          |          | -       |          |          |          |
| P09228 CYTT_HUMAN  | -6.46619 | -6.95475 | -6.87266 | -6.94278 | 6.37197 | -5.85611 | -7.16257 | -6.12861 |
|                    |          |          |          |          | -       |          |          |          |
| P09211 GSTP1_HUMAN | -3.7241  | -4.0293  | -3.94405 | -3.27672 | 0.84625 | -3.88678 | -3.94917 | -2.56202 |
|                    |          |          | 4.12364  |          | 3.55118 |          |          |          |
| Q9GZZ8 LACRT_HUMAN | 3.472011 | 2.63853  | 5        | 2.73628  | 1       | 2.410184 | 2.261791 | 2.702174 |
|                    |          |          |          |          | -       |          |          |          |
| P02647 APOA1_HUMAN | -4.9386  | -4.72009 | -4.73094 | -3.00322 | 3.41234 | -5.23459 | -4.43072 | -4.36827 |
|                    |          |          |          |          | -       |          |          |          |
| Q96DA0 ZG16B_HUMAN | -1.4158  | -1.29429 | -1.55954 | -1.16113 | 0.88204 | -2.69355 | -1.7538  | -0.97523 |
|                    |          |          |          |          | 0.69257 |          |          |          |
| P05109 S10A8_HUMAN | -0.33673 | -0.87101 | -1.96241 | -0.68769 | 5       | -1.10502 | -1.54314 | -0.37074 |
|                    |          |          |          |          | -       |          |          |          |
| P07602 SAP_HUMAN   | -4.10545 | -4.33008 | -3.85803 | -4.02388 | 3.20576 | -4.47375 | -4.23739 | -3.91163 |
|                    |          |          |          |          | -       |          |          |          |
| P05090 APOD_HUMAN  | -2.60645 | 0.472118 | -3.06546 | 0.208537 | 1.88969 | -1.87049 | -0.98809 | -1.7284  |
|                    |          |          |          |          | -       |          |          |          |
| P11142 HSP7C_HUMAN | -6.84932 | -6.98051 | -6.13591 | -6.13285 | 5.32629 | -6.85378 | -7.2469  | -5.56337 |
| Q5D862 FILA2_HUMAN | -3.45339 | -4.19164 | -4.29676 | -3.82616 | -3.713  | -4.67146 | -4.05533 | -3.60361 |
| P61769 B2MG_HUMAN  | -2.266   | -2.8712  | -2.11933 | -2.49525 | -2.7227 | -0.42384 | -2.8545  | -1.13285 |
|                    |          |          |          |          | -       |          |          |          |
| Q01469 FABP5_HUMAN | -4.07993 | -4.89848 | -4.62833 | -4.43179 | 1.80265 | -4.03495 | -4.44972 | -3.71897 |
|                    |          |          |          |          | -       |          |          |          |
| P34096 RNAS4_HUMAN | -1.79812 | -2.25694 | -0.06668 | -2.37712 | 2.32576 | -1.73408 | -2.64449 | -0.97136 |



|                    |          |          |          |          |         |          |          |          |
|--------------------|----------|----------|----------|----------|---------|----------|----------|----------|
| P07339 CATD_HUMAN  | -2.82259 | -3.5013  | -3.59386 | -3.1189  | 2.03175 | -3.5444  | -3.75442 | -3.2793  |
| P30044 PRDX5_HUMAN | -8.43586 | -8.33797 | -7.52547 | -7.2939  | 4.70065 | -7.29509 | -8.29004 | -6.61543 |
| P04075 ALDOA_HUMAN | -5.01314 | -5.71448 | -5.25698 | -5.41228 | 3.28951 | -5.75177 | -6.04533 | -4.40567 |
| P31947 I433S_HUMAN | -5.76043 | -6.20323 | -6.22168 | -5.21762 | 2.89751 | -6.53682 | -5.86259 | -4.94573 |
| Q5VTE0 EF1A3_HUMAN | -3.93521 | -4.65827 | -4.38751 | -4.00814 | 2.15874 | -4.64359 | -5.13883 | -2.99986 |
| P68104 EF1A1_HUMAN | -3.93521 | -4.65827 | -4.38751 | -4.00814 | 2.15874 | -4.64359 | -5.13883 | -2.99986 |
| P62937 PPIA_HUMAN  | -3.75927 | -4.10819 | -4.24366 | -3.64695 | 1.83623 | -3.84448 | -4.07722 | -3.109   |
| P62805 H4_HUMAN    | -2.26928 | -2.21202 | -2.75529 | -2.1139  | 0.77948 | -2.50499 | -3.57244 | -1.88503 |
| P07737 PROF1_HUMAN | -5.93239 | -6.11779 | -6.59324 | -5.53    | 3.07451 | -4.58952 | -6.26976 | -4.55283 |
| A0M8Q6 IGLC7_HUMAN | -5.42765 | -6.22212 | -5.83748 | -5.36167 | 4.72615 | -6.52915 | -6.32444 | -5.07396 |
| Q99456 K1C12_HUMAN | -3.08698 | -3.88216 | -2.65622 | -4.123   | 3.72699 | -4.92127 | -3.73865 | -3.28486 |
| Q06830 PRDX1_HUMAN | -3.22509 | -3.57376 | -3.52978 | -3.14392 | 1.82424 | -3.5307  | -3.75569 | -2.73589 |
| P30086 PEBP1_HUMAN | -6.14624 | -6.22659 | -6.64371 | -6.10364 | 3.74296 | -6.12667 | -6.08065 | -5.1581  |
| Q3SY84 K2C71_HUMAN | -6.23188 | -6.57254 | -6.46216 | -7.01353 | 6.02593 | -6.7254  | -6.37259 | -5.85209 |
| P02545 LMNA_HUMAN  | -5.7672  | -6.83154 | -6.74614 | -6.42017 | 3.65068 | -6.67215 | -6.44965 | -6.94772 |
| P00338 LDHA_HUMAN  | -4.89224 | -4.99802 | -3.44951 | -5.03417 | 3.29983 | -4.63912 | -5.36746 | -3.35053 |
| P01034 CYTC_HUMAN  | -2.61858 | -3.4995  | -2.08727 | -2.99307 | 2.48555 | -1.90227 | -2.96617 | -2.27967 |
| P68363 TBA1B_HUMAN | -8.52451 | -9.80431 | -8.95348 | -9.47495 | 7.58726 | -9.43201 |          | -8.57345 |
| P52209 6PGD_HUMAN  | -5.31828 | -5.42321 | -5.15869 | -5.1509  | 2.57053 | -5.56956 | -5.63648 | -4.13067 |

|                    |          |          |          |          |         |          |          |          |
|--------------------|----------|----------|----------|----------|---------|----------|----------|----------|
| Q8N474 SFRP1_HUMAN | -2.63913 | -2.89885 | -2.6992  | -2.4562  | 3.19564 | -4.30895 | -3.51572 | -1.85957 |
| P01011 AACT_HUMAN  | -4.20971 | -5.07306 | -4.79196 | -4.76584 | 4.98769 | -5.61692 | -5.17631 | -3.42858 |
| P17931 LEG3_HUMAN  | -3.26511 | -3.59554 | -3.53072 | -2.94364 | 1.00052 | -3.21334 | -4.01438 | -2.05523 |
| P01619 KV320_HUMAN | -2.95575 | -3.77475 | -3.50397 | -3.37169 | 2.60349 | -4.0326  | -3.62907 | -3.01424 |
| P11021 BIP_HUMAN   | -7.59759 | -7.80965 | -7.35912 | -6.69029 | 5.79285 | -7.22836 | -7.63084 | -6.73653 |
| P00558 PGK1_HUMAN  | -6.18238 | -6.95512 | -7.40982 | -6.32053 | 3.71454 | -6.83127 | -7.30515 | -5.51342 |
| P07858 CATB_HUMAN  | -5.28787 | -5.65641 | -5.56706 | -5.62379 | 5.00652 | -6.43944 | -5.52113 | -5.05581 |
| P29401 TKT_HUMAN   | -4.51089 | -5.16193 | -4.37116 | -3.52702 | 3.03039 | -4.85298 | -3.32041 | -3.7238  |
| P80303 NUCB2_HUMAN | -2.88998 | -3.01567 | -2.38836 | -2.99837 | 2.27174 | -3.82074 | -3.53209 | -2.89735 |
| P15311 EZRI_HUMAN  | -5.88459 | -6.24443 | -5.88572 | -5.53874 | -3.681  | -5.77949 | -6.83174 | -4.93884 |
| Q08554 DSC1_HUMAN  | -3.59756 | -4.21717 | -4.06422 | -3.70378 | 4.03273 | -4.21519 | -3.97503 | -3.48879 |
| Q93079 H2B1H_HUMAN | -3.30787 | -3.3345  | -3.67062 | -3.24569 | 1.95825 | -3.60132 | -4.19319 | -2.67934 |
| Q5QNW6 H2B2F_HUMAN | -3.30787 | -3.3345  | -3.67062 | -3.24569 | 1.95825 | -3.60132 | -4.19319 | -2.67934 |
| Q99877 H2B1N_HUMAN | -3.30787 | -3.3345  | -3.67062 | -3.24569 | 1.95825 | -3.60132 | -4.19319 | -2.67934 |
| O60814 H2B1K_HUMAN | -3.30787 | -3.3345  | -3.67062 | -3.24569 | 1.95825 | -3.60132 | -4.19319 | -2.67934 |
| P62807 H2B1C_HUMAN | -3.30787 | -3.3345  | -3.67062 | -3.24569 | 1.95825 | -3.60132 | -4.19319 | -2.67934 |
| P58876 H2B1D_HUMAN | -3.30787 | -3.3345  | -3.67062 | -3.24569 | 1.95825 | -3.60132 | -4.19319 | -2.67934 |
| Q99880 H2B1L_HUMAN | -3.30787 | -3.3345  | -3.67062 | -3.24569 | 1.95825 | -3.60132 | -4.19319 | -2.67934 |
| P57053 H2BFS_HUMAN | -3.30787 | -3.3345  | -3.67062 | -3.24569 | 1.95825 | -3.60132 | -4.19319 | -2.67934 |

|                        |          |          |          |          |         |          |          |          |
|------------------------|----------|----------|----------|----------|---------|----------|----------|----------|
| Q99879 H2B1M_HUMAN     | -3.30787 | -3.3345  | -3.67062 | -3.24569 | 1.95825 | -3.60132 | -4.19319 | -2.67934 |
| P27797 CALR_HUMAN      | -6.40666 | -6.42052 | -6.16831 | -5.66978 | 5.09841 | -6.11477 | -6.28456 | -5.30541 |
| Q6UXB2 CXL17_HUMAN     | -2.06737 | -1.3318  | -0.05492 | -3.06382 | 2.45974 | -2.62511 | -1.86024 | -2.12608 |
| A0A0B4J1X5 HV374_HUMAN | -5.35614 | -6.26571 | -6.13828 | -6.09139 | 4.94031 | -6.37771 | -6.18354 | -5.68743 |
| P06744 G6PI_HUMAN      | -7.12776 | -7.56928 | -7.20427 | -7.16287 | 5.40295 | -7.68219 | -6.92837 | -6.56802 |
| P05783 K1C18_HUMAN     | -4.95249 | -5.81751 | -4.55832 | -4.48979 | 5.92273 | -6.24389 | -5.30919 | -4.6039  |
| P01040 CYTA_HUMAN      | -3.7952  | -4.50224 | -3.94738 | -3.85134 | 3.43438 | -4.14814 | -4.09167 | -4.10725 |
| P40394 ADH7_HUMAN      | -7.99795 | -8.52093 | -8.47589 | -7.46493 | 5.35525 | -8.43529 | -8.50708 | -6.90951 |
| A0A0B4J1V0 HV315_HUMAN | -4.8302  | -5.2689  | -5.37528 | -5.18315 | -4.306  | -5.70011 | -5.9516  | -4.57127 |
| P80748 LV321_HUMAN     | -5.81698 | -6.37941 | -6.26232 | -5.90678 | 5.24504 | -6.75034 | -6.55175 | -5.67631 |
| P62979 RS27A_HUMAN     | -4.17845 | -4.84773 | -4.42964 | -4.64528 | 3.78408 | -4.86315 | -5.1185  | -4.17022 |
| P62987 RL40_HUMAN      | -4.17845 | -4.84773 | -4.42964 | -4.64528 | 3.78408 | -4.86315 | -5.1185  | -4.17022 |
| P0CG47 UBB_HUMAN       | -4.17845 | -4.84773 | -4.42964 | -4.64528 | 3.78408 | -4.86315 | -5.1185  | -4.17022 |
| P0CG48 UBC_HUMAN       | -4.17845 | -4.84773 | -4.42964 | -4.64528 | 3.78408 | -4.86315 | -5.1185  | -4.17022 |
| P16403 H12_HUMAN       | -7.12728 | -7.182   | -7.81785 | -7.43823 | 5.46556 | -7.41372 | -7.41288 | -7.45873 |
| P27348 I433T_HUMAN     | -7.5434  | -7.63403 | -8.02748 | -7.79028 | 6.38579 | -8.17398 | -8.21127 | -7.30352 |
| P07237 PDIA1_HUMAN     | -3.40544 | -3.91176 | -3.68454 | -2.98399 | -2.8057 | -3.97561 | -3.6883  | -2.83648 |
| P00751 CFAB_HUMAN      | -4.39531 | -4.6608  | -4.36991 | -3.6078  | 2.85891 | -4.40044 | -4.50635 | -3.6107  |
| P06312 KV401_HUMAN     | -5.27464 | -5.767   | -5.35878 | -5.80417 | 4.89817 | -6.09766 | -5.91321 | -4.5662  |
| P02765 FETUA_HUMAN     | -10.0997 | -9.50727 | -10.2918 | -9.06    | 7.57328 | -10.1091 | -9.81007 | -9.33276 |

|                        |          |          |          |          |         |          |          |          |
|------------------------|----------|----------|----------|----------|---------|----------|----------|----------|
| P10412 H14_HUMAN       | -6.36481 | -6.50306 | -6.85291 | -6.04108 | 4.54528 | -6.50328 | -6.74719 | -6.23389 |
| P31941 ABC3A_HUMAN     | -6.84932 | -7.38035 | -7.20347 | -5.63356 | 4.66749 | -6.10245 | -7.52826 | -5.72423 |
| P55058 PLTP_HUMAN      | -4.96764 | -4.64785 | -3.98743 | -4.7799  | 4.51512 | -5.07309 | -5.10835 | -4.00868 |
| P01615 KVD28_HUMAN     | -7.24782 | -8.08874 | -7.68618 | -7.50392 | 6.83045 | -8.28748 | -8.40148 | -7.0075  |
| A0A075B6P5 KV228_HUMAN | -7.24782 | -8.08874 | -7.68618 | -7.50392 | 6.83045 | -8.28748 | -8.40148 | -7.0075  |
| P81605 DCD_HUMAN       | -1.48236 | -0.87684 | -1.54624 | -2.271   | 1.42739 | -2.1374  | -1.73847 | -2.1881  |
| P02774 VTDB_HUMAN      |          | -10.4691 |          | -10.5688 | 10.2148 | -11.1945 | -10.2602 | -9.77017 |
| P14550 AK1A1_HUMAN     | -7.16815 | -7.83016 | -8.20162 | -7.06732 | 4.58319 | -7.70488 | -8.15324 | -6.47025 |
| A0A0B4J1Y9 HV372_HUMAN | -8.69843 | -9.64439 | -9.43168 | -9.51602 | 8.84577 | -9.77457 | -9.71884 | -8.61135 |
| P32119 PRDX2_HUMAN     | -5.03226 | -5.41225 | -5.38166 | -5.20697 | 4.29407 | -5.52519 | -5.25787 | -5.02459 |
| P26447 S10A4_HUMAN     | -2.86549 | -3.02412 | -3.36986 | -2.21228 | 0.87866 | -2.85145 | -3.33252 | -1.82475 |
| P31151 S10A7_HUMAN     | -4.5115  | -5.77325 | -6.10479 | -4.54766 | 5.72983 | -5.9085  | -5.09182 | -6.02424 |
| Q15517 CDSN_HUMAN      | -5.68125 | -6.37697 | -6.44393 | -6.17292 | 5.89661 | -6.42879 | -6.12887 | -5.80945 |
| P20930 FILA_HUMAN      | -5.25284 | -5.93456 | -6.17291 | -5.82975 | 5.70182 | -6.33405 | -5.86554 | -5.72725 |
| P0DP08 HVD82_HUMAN     | -2.54937 | -3.0618  | -2.83871 | -2.85438 | 1.85524 | -3.1457  | -3.55941 | -2.34482 |
| P01825 HV459_HUMAN     | -2.54937 | -3.0618  | -2.83871 | -2.85438 | 1.85524 | -3.1457  | -3.55941 | -2.34482 |
| P0DP07 HV431_HUMAN     | -2.54937 | -3.0618  | -2.83871 | -2.85438 | 1.85524 | -3.1457  | -3.55941 | -2.34482 |
| A0A0C4DH41 HV461_HUMAN | -2.54937 | -3.0618  | -2.83871 | -2.85438 | 1.85524 | -3.1457  | -3.55941 | -2.34482 |
| P0DP06 HVD34_HUMAN     | -2.54937 | -3.0618  | -2.83871 | -2.85438 | 1.85524 | -3.1457  | -3.55941 | -2.34482 |

|                        |          |          |          |          |         |          |          |          |
|------------------------|----------|----------|----------|----------|---------|----------|----------|----------|
| P06331 HV434_HUMAN     | -2.54937 | -3.0618  | -2.83871 | -2.85438 | 1.85524 | -3.1457  | -3.55941 | -2.34482 |
| P01824 HV439_HUMAN     | -2.54937 | -3.0618  | -2.83871 | -2.85438 | 1.85524 | -3.1457  | -3.55941 | -2.34482 |
| A0A0A0MRZ8 KVD11_HUMAN | -5.71144 | -6.23968 | -6.05472 | -6.24162 | -5.1309 | -6.76314 | -6.35898 | -5.62449 |
| P04433 KV311_HUMAN     | -5.71144 | -6.23968 | -6.05472 | -6.24162 | -5.1309 | -6.76314 | -6.35898 | -5.62449 |
| P31949 S10AB_HUMAN     | -5.31176 | -5.45169 | -6.12217 | -5.10304 | 3.72335 | -5.39545 | -6.71989 | -4.39476 |
| P60953 CDC42_HUMAN     | -6.58616 | -6.39147 | -6.82827 | -5.82575 | 4.56609 | -6.71603 | -7.29434 | -5.81848 |
| Q6KB66 K2C80_HUMAN     | -8.6678  | -8.9854  | -8.66817 | -8.50298 | 8.83253 | -9.22202 | -9.3679  | -8.50507 |
| P10599 THIO_HUMAN      | -3.66851 | -4.23336 | -4.40905 | -3.83814 | 1.46361 | -3.76825 | -4.42179 | -3.54292 |
| P40925 MDHC_HUMAN      | -6.71157 | -6.73842 | -7.04832 | -6.26346 | 4.46956 | -6.62107 | -6.75754 | -5.72258 |
| Q14515 SPRL1_HUMAN     | -3.2758  | -3.80876 | -3.77507 | -4.21336 | 3.97923 | -4.41994 | -3.68344 | -2.2857  |
| A0A075B6S5 KV127_HUMAN | -5.0498  | -5.59981 | -5.41182 | -5.39444 | 5.15883 | -4.8985  | -5.73801 | -4.88592 |
| P01742 HV169_HUMAN     | -3.38891 | -4.00144 | -3.74552 | -3.71183 | 2.74427 | -4.19856 | -4.44511 | -3.31083 |
| A0A0C4DH31 HV118_HUMAN | -5.93225 | -6.75694 | -6.29461 | -6.2108  | 5.25537 | -6.82069 | -6.81902 | -5.76985 |
| P23083 HV102_HUMAN     | -5.93225 | -6.75694 | -6.29461 | -6.2108  | 5.25537 | -6.82069 | -6.81902 | -5.76985 |
| P07900 HS90A_HUMAN     | -7.17481 | -7.12507 | -7.49967 | -7.19445 | 6.38177 | -7.54872 | -7.65819 | -5.83089 |
| P84243 H33_HUMAN       | -5.38144 | -5.63307 | -5.76599 | -5.62379 | -4.4813 | -5.90019 | -6.70789 | -5.21518 |
| P01700 LV147_HUMAN     | -5.09284 | -5.73612 | -5.34049 | -5.25019 | 4.71078 | -5.84335 | -5.64433 | -4.69205 |
| P23528 COF1_HUMAN      | -6.41264 | -6.69024 | -6.32327 | -5.9089  | 3.29867 | -6.7345  | -6.93139 | -5.88777 |
| P21980 TGM2_HUMAN      | -6.69092 | -6.11991 | -5.96997 | -5.02705 | 2.85984 | -5.84432 | -7.08259 | -4.8303  |
| Q09666 AHNK_HUMAN      | -5.12781 | -5.18978 | -5.4342  | -5.35433 | 3.46434 | -5.67116 | -5.59102 | -4.80682 |

|                        |          |          |          |          |         |          |          |          |
|------------------------|----------|----------|----------|----------|---------|----------|----------|----------|
| P01624 KV315_HUMAN     | -5.22639 | -5.80216 | -5.59554 | -5.58831 | 4.55938 | -6.13954 | -6.1637  | -5.21378 |
| P07384 CAN1_HUMAN      | -6.74383 | -6.93144 | -6.41886 | -6.28678 | -5.1499 | -7.02036 | -7.37794 | -5.89148 |
| Q6UWP8 SBSN_HUMAN      | -8.35535 | -9.13308 | -9.51612 | -9.11153 | 8.09129 | -8.97319 | -9.55717 | -8.51171 |
| Q8NBJ4 GOLM1_HUMAN     | -3.93553 | -4.33025 | -4.12253 | -4.21388 | 3.55641 | -5.0821  | -4.45114 | -3.98212 |
| P40926 MDHM_HUMAN      | -6.10485 | -6.77644 | -6.27297 | -5.63351 | 5.16947 | -6.41185 | -6.13743 | -5.58447 |
| P68371 TBB4B_HUMAN     | -5.8466  | -6.38338 | -6.31187 | -6.05051 | 5.05668 | -7.42498 | -6.55967 | -5.43531 |
| A0A0A0MS15 HV349_HUMAN | -6.00548 | -6.65234 | -6.50363 | -6.13148 | 6.02567 | -7.01524 | -6.04369 | -5.93646 |
| P01593 KVD33_HUMAN     | -7.4147  | -7.83731 | -6.71859 | -7.80045 | 7.22002 | -7.46696 | -7.8617  | -6.50321 |
| P01594 KV133_HUMAN     | -7.4147  | -7.83731 | -6.71859 | -7.80045 | 7.22002 | -7.46696 | -7.8617  | -6.50321 |
| P02766 TTHY_HUMAN      | -5.48347 | -5.57957 | -5.70222 | -4.7882  | 4.84292 | -5.98276 | -5.3704  | -4.53205 |
| Q08188 TGM3_HUMAN      | -7.27875 | -8.22653 | -8.67002 | -8.05235 | 7.98997 | -8.63642 | -8.37007 | -8.00155 |
| P05089 ARGI1_HUMAN     | -4.36059 | -4.9659  | -5.07895 | -4.92842 | 4.41203 | -5.22403 | -4.58677 | -4.47135 |
| Q9UBT3 DKK4_HUMAN      |          | -10.8211 | -9.7002  | -9.11164 |         | -10.8336 |          | -8.53731 |
| O00584 RNT2_HUMAN      | -7.16858 | -7.65369 | -7.53956 | -7.91179 | 7.03712 | -8.67246 | -7.69309 | -7.35016 |
| A0A0B4J2D9 KVD13_HUMAN | -6.76274 | -7.20959 | -5.68054 | -7.29353 | 6.60405 | -7.37245 | -7.35499 | -6.63479 |
| P0DP09 KV113_HUMAN     | -6.76274 | -7.20959 | -5.68054 | -7.29353 | 6.60405 | -7.37245 | -7.35499 | -6.63479 |
| O75874 IDHC_HUMAN      | -8.57235 | -9.0018  | -8.01177 | -8.4579  | 5.66305 | -8.1838  | -8.81793 | -7.24922 |
| P15814 IGLL1_HUMAN     | -1.22278 | -2.00807 | -1.8108  | -1.57018 | 0.73475 | -2.17013 | -2.43905 | -1.26027 |
| P30085 KCY_HUMAN       | -7.82263 | -7.86357 | -9.04732 | -7.78972 | 5.14652 | -8.34283 | -8.27369 | -7.16237 |
| A0A0C4DH34 HV428_HUMAN | -5.55215 | -6.32039 | -5.97925 | -5.98519 | 5.21187 | -6.4086  | -6.75241 | -5.50841 |

|                        |          |          |          |          |         |          |          |          |
|------------------------|----------|----------|----------|----------|---------|----------|----------|----------|
| P30101 PDIA3_HUMAN     | -7.11005 | -7.39414 | -6.19394 | -7.36082 | 6.77934 | -6.92359 | -7.61638 | -5.94746 |
| Q14697 GANAB_HUMAN     |          | -11.0586 | -10.0431 | -9.74076 | 10.7397 |          |          |          |
| P12830 CADH1_HUMAN     | -5.56963 | -5.68427 | -4.32576 | -5.819   | -5.9842 | -6.28645 | -5.92136 | -5.09635 |
| Q16651 PRSS8_HUMAN     | -5.17261 | -5.3124  | -5.27172 | -4.53104 | 4.47944 | -5.78037 | -5.26114 | -4.30494 |
| P13987 CD59_HUMAN      | -6.95568 | -6.96621 | -7.24699 | -6.99895 | 5.89386 | -7.76882 | -7.33792 | -6.59257 |
| O43653 PSCA_HUMAN      | -5.23123 | -5.16124 | -5.13579 | -4.96359 | 2.57738 | -5.21533 | -6.18174 | -4.75298 |
| P02763 A1AG1_HUMAN     | -8.66832 | -9.23387 | -8.91938 | -8.363   | 8.46434 | -9.19836 | -8.44463 | -7.52723 |
| A0A0B4J1V6 HV373_HUMAN | -6.75625 | -7.32907 | -6.99541 | -7.36107 | 5.91565 | -7.83755 | -7.35578 | -6.7685  |
| O43852 CALU_HUMAN      | -5.87137 | -6.17875 | -5.85043 | -5.70424 | 5.37985 | -6.8695  | -6.57881 | -5.53956 |
| P08758 ANXA5_HUMAN     | -6.16225 | -6.61341 | -6.82458 | -6.09292 | 5.78611 | -6.43174 | -6.4031  | -5.99975 |
| Q5T749 KPRP_HUMAN      | -5.17286 | -5.9887  | -6.00506 | -6.20077 | 5.87857 | -6.47662 | -6.27134 | -5.78196 |
| Q7Z5P9 MUC19_HUMAN     | -5.27027 | -6.20724 | -4.91221 | -5.85476 | 5.28385 | -6.74969 | -5.43951 | -3.87094 |
| P01714 LV319_HUMAN     | -9.02416 | -9.44793 | -9.46087 | -9.16026 | 8.26173 | -10.0031 | -10.194  | -9.02911 |
| P01717 LV325_HUMAN     | -5.6369  | -6.34466 | -6.23239 | -5.8831  | 5.22351 | -6.6104  | -6.38164 | -5.64145 |
| A0A075B6K4 LV310_HUMAN | -5.6369  | -6.34466 | -6.23239 | -5.8831  | 5.22351 | -6.6104  | -6.38164 | -5.64145 |
| P23284 PPIB_HUMAN      | -3.28802 | -4.20493 | -2.42915 | -4.78103 | 4.64324 | -4.09193 | -3.85678 | -1.79811 |
| P12814 ACTN1_HUMAN     | -6.34292 | -6.58848 | -6.74864 | -5.75661 | 5.42567 | -6.29365 | -7.71446 | -5.33556 |
| P40199 CEAM6_HUMAN     | -6.0355  | -6.30324 | -5.01341 | -5.67632 | 4.68274 | -6.45369 | -6.05053 | -5.90221 |
| Q02818 NUCB1_HUMAN     | -5.16519 | -5.52408 | -5.21282 | -5.47965 | -4.7566 | -6.32543 | -5.91081 | -5.39556 |
| P49788 TIG1_HUMAN      | -8.64523 | -8.60231 | -8.65626 | -9.0191  | -7.6098 | -8.94308 | -8.76308 | -7.63557 |

|                    |          |          |          |          |         |          |          |          |
|--------------------|----------|----------|----------|----------|---------|----------|----------|----------|
| P06703 S10A6_HUMAN | -3.70841 | -3.99943 | -3.31009 | -2.85984 | 2.23263 | -3.60962 | -3.92036 | -3.05362 |
| P16401 H15_HUMAN   | -6.31906 | -6.36685 | -7.04766 | -6.43177 | 4.62089 | -6.49455 | -6.78688 | -6.39094 |
| O60437 PEPL_HUMAN  | -6.41009 | -6.73338 | -6.60541 | -6.8131  | 5.34855 | -7.69353 | -7.34372 | -6.19388 |
| P47929 LEG7_HUMAN  | -4.8597  | -6.26449 | -5.72841 | -5.21901 | 4.98152 | -6.07949 | -6.15853 | -5.58743 |
| Q14508 WFDC2_HUMAN | -7.24486 | -6.51606 | -6.41956 | -6.07153 | 6.31294 | -6.26811 | -6.59425 | -5.90763 |
| Q13835 PKP1_HUMAN  | -6.42676 | -6.49026 | -6.55865 | -6.43118 | 5.88512 | -7.15824 | -6.12729 | -6.52063 |
| P02750 A2GL_HUMAN  | -8.8396  | -9.1117  | -9.454   | -8.60875 | 7.31447 | -8.83956 | -9.05208 | -7.4578  |
| P21926 CD9_HUMAN   | -4.88626 | -4.97864 | -4.24529 | -5.26891 | 3.34706 | -4.69998 | -5.30419 | -4.13642 |
| P19961 AMY2B_HUMAN | -5.38664 | -6.57653 | -6.12371 | -6.35846 | 6.17991 | -7.10629 | -6.24363 | -5.66286 |
| P0DTE7 AMY1B_HUMAN | -5.38664 | -6.57653 | -6.12371 | -6.35846 | 6.17991 | -7.10629 | -6.24363 | -5.66286 |
| P04746 AMYP_HUMAN  | -5.38664 | -6.57653 | -6.12371 | -6.35846 | 6.17991 | -7.10629 | -6.24363 | -5.66286 |
| P04745 AMY1A_HUMAN | -5.38664 | -6.57653 | -6.12371 | -6.35846 | 6.17991 | -7.10629 | -6.24363 | -5.66286 |
| P0DTE8 AMY1C_HUMAN | -5.38664 | -6.57653 | -6.12371 | -6.35846 | 6.17991 | -7.10629 | -6.24363 | -5.66286 |
| Q9UBC9 SPRR3_HUMAN | -4.64326 | -5.53079 | -7.45205 | -5.77754 | 3.58893 | -5.74193 | -6.79356 | -5.47883 |
| Q96QA5 GSDMA_HUMAN | -4.69146 | -5.53602 | -5.07734 | -5.23402 | 4.69534 | -5.88529 | -5.38087 | -4.81229 |
| Q13296 SG2A2_HUMAN | -3.92156 | -4.72639 | -3.89247 | -4.56964 | -4.6491 | -4.39205 | -5.19716 | -4.26395 |
| Q14002 CEAM7_HUMAN | -8.4064  | -8.36751 | -8.22688 | -8.47568 | 6.97174 | -8.57095 | -9.48277 | -7.66684 |
| P62753 RS6_HUMAN   | -5.37324 | -6.0273  | -5.49103 | -5.41294 | 5.15756 | -6.2748  | -5.58988 | -5.72303 |
| P09429 HMGB1_HUMAN | -3.32488 | -5.53764 | -3.6334  | -4.22501 | 4.09273 | -4.96954 | -3.61606 | -4.3485  |



|                        |          |          |          |          |         |          |          |          |
|------------------------|----------|----------|----------|----------|---------|----------|----------|----------|
| P83731 RL24_HUMAN      | -3.50667 | -5.52218 | -3.50134 | -3.85346 | 4.39129 | -4.90005 | -3.7431  | -4.93323 |
| Q96S96 PEBP4_HUMAN     | -7.25227 | -7.50747 | -7.46673 | -8.26347 | 7.59006 | -8.54728 | -7.49101 | -6.70571 |
| Q5SNV9 CA167_HUMAN     | -8.74368 | -9.62675 | -8.38498 | -8.83633 | 9.48695 | -9.81425 | -9.21232 | -7.04987 |
| Q6ZR08 DYH12_HUMAN     | -4.90204 | -5.72288 | -5.85493 | -5.02249 | 4.65515 | -6.16844 | -5.61661 | -5.55265 |
| P07910 HNRPC_HUMAN     | -8.68341 | -8.46397 | -8.93329 | -6.10687 | 7.47185 | -8.7381  | -9.32875 | -7.12046 |
| Q9UKZ1 CNO11_HUMAN     | -6.98712 | -7.46015 | -6.34341 | -7.35543 | 7.23032 | -7.0368  | -7.5629  | -5.83488 |
| P20933 ASPG_HUMAN      | -7.08566 | -8.77682 | -7.76528 | -7.64066 | 7.75364 | -8.59597 | -7.31794 | -8.16054 |
| Q8IZL8 PELP1_HUMAN     | -8.54875 | -9.85582 | -9.31881 | -8.7408  | 8.77594 | -9.82372 | -8.3143  | -8.89414 |
| P00505 AATM_HUMAN      | -6.07554 | -5.30337 | -5.84087 | -4.65004 | 4.64383 | -5.54525 | -5.58931 | -5.3518  |
| P48634 PRC2A_HUMAN     |          | -10.9782 |          | -11.0087 |         | -11.8276 |          |          |
| Q96G74 OTUD5_HUMAN     | -8.66004 | -9.12975 | -8.54188 | -9.48592 | 8.40249 | -9.55808 | -8.85419 | -7.81671 |
| Q8IVF2 AHNK2_HUMAN     | -5.4026  | -6.15203 | -5.49963 | -6.04856 | 6.06265 | -3.41921 | -5.75259 | -4.65657 |
| Q8TF72 SHRM3_HUMAN     | -10.6705 | -8.9997  | -8.40182 | -8.53049 | 10.3623 | -9.87405 | -8.71353 | -8.6235  |
| Q14966 ZN638_HUMAN     | -4.94594 | -5.67779 | -4.42239 | -5.45581 | 4.96838 | -5.85507 | -5.35082 | -5.51751 |
| Q7LBE3 S26A9_HUMAN     | -3.5856  | -4.47892 | -4.45898 | -4.39823 | 4.36689 | -5.1575  | -4.0614  | -1.98143 |
| A6NKD9 CC85C_HUMAN     | -6.59761 | -6.80393 | -5.45449 | -8.02423 | 7.14666 | -6.41757 | -7.64823 | -5.24513 |
| A0A0B4J1U7 HV601_HUMAN | -3.5085  | -4.13771 | -3.9008  | -3.76547 | -2.8582 | -4.3949  | -4.25919 | -2.87077 |
| Q6PID8 KLD10_HUMAN     |          | -11.4141 | -9.11924 |          |         | -10.616  |          | -9.19522 |
| Q99574 NEUS_HUMAN      | -8.25175 | -8.76881 | -8.66751 | -8.97838 | 8.46542 | -9.16544 | -8.95868 | -7.17077 |
| Q14526 HIC1_HUMAN      | -6.86121 | -7.53072 | -7.70944 | -7.55867 | 7.59338 | -8.32828 | -7.07015 | -5.08482 |

|                        |          |          |          |          |         |          |          |          |
|------------------------|----------|----------|----------|----------|---------|----------|----------|----------|
| Q5VSY0 GKAP1_HUMAN     | -7.30782 | -7.90108 | -8.14322 | -7.16989 | 5.76703 | -8.04889 | -8.12672 | -6.62636 |
| Q8TCU6 PREX1_HUMAN     | -6.41865 | -5.79701 | -7.36593 | -6.36682 | 5.18473 | -6.99055 | -7.12253 | -5.89757 |
| Q7Z2W7 TRPM8_HUMAN     | -7.0547  | -7.7975  | -7.5493  | -8.19477 | 8.15266 | -7.76552 | -8.41114 | -5.94919 |
| Q14106 TOB2_HUMAN      | -6.88595 | -7.54463 | -7.43574 | -6.79204 | 6.90826 | -7.95579 | -7.57233 | -6.65584 |
| Q9GZQ3 COMD5_HUMAN     | -8.32065 | -9.54956 | -8.22953 | -9.06282 | 8.75948 | -9.39306 | -8.9227  | -8.40295 |
| Q8NHQ8 RASF8_HUMAN     | -2.44132 | -7.56089 | -6.69636 | -7.51004 | 7.17849 | -7.90284 | -7.20873 | -6.37483 |
| P01703 LV140_HUMAN     | -7.09701 | -7.7642  | -7.2964  | -7.37469 | 6.51802 | -7.98004 | -7.4098  | -6.50998 |
| O75882 ATRN_HUMAN      | -8.61462 | -8.92089 | -8.22028 | -9.63949 | 9.14574 | -8.83735 | -9.36946 | -7.89296 |
| O60902 SHOX2_HUMAN     | -6.82715 | -7.64228 | -7.26171 | -8.17867 | 7.61399 | -7.98286 | -7.96445 | -8.04109 |
| Q5VSP4 LC1L1_HUMAN     |          |          |          |          |         |          |          |          |
| P01861 IGHG4_HUMAN     |          |          |          |          |         |          |          |          |
| O95678 K2C75_HUMAN     |          |          |          |          |         |          |          |          |
| P0DOX6 IGM_HUMAN       |          |          |          |          |         |          |          |          |
| Q86YZ3 HORN_HUMAN      |          |          |          |          |         |          |          |          |
| Q14525 KT33B_HUMAN     |          |          |          |          |         |          |          |          |
| Q562R1 ACTBL_HUMAN     |          |          |          |          |         |          |          |          |
| P31946 I433B_HUMAN     |          |          |          |          |         |          |          |          |
| Q7Z3Y8 K1C27_HUMAN     |          |          |          |          |         |          |          |          |
| P01780 HV307_HUMAN     |          |          |          |          |         |          |          |          |
| A0A0J9YX35 HV64D_HUMAN |          |          |          |          |         |          |          |          |
| A0A0J9YXX1 HV5X1_HUMAN |          |          |          |          |         |          |          |          |
| A0A0C4DH38 HV551_HUMAN |          |          |          |          |         |          |          |          |
| P28799 GRN_HUMAN       |          |          |          |          |         |          |          |          |
| P01762 HV311_HUMAN     |          |          |          |          |         |          |          |          |
| Q7Z3Y9 K1C26_HUMAN     |          |          |          |          |         |          |          |          |
| Q15149 PLEC_HUMAN      |          |          |          |          |         |          |          |          |

Q7Z406|MYH14\_HUMAN  
P06731|CEAM5\_HUMAN  
P04632|CPNS1\_HUMAN  
Q07666|KHDR1\_HUMAN  
O60716|CTND1\_HUMAN  
P01611|KVD12\_HUMAN  
A0A0C4DH72|KV106\_HUMAN  
P08246|ELNE\_HUMAN  
A0A075B6R9|KVD24\_HUMAN  
A0A0C4DH68|KV224\_HUMAN  
P40121|CAPG\_HUMAN  
O76021|RL1D1\_HUMAN  
A0A075B6H7|KV37\_HUMAN  
P42357|HUTH\_HUMAN  
P13797|PLST\_HUMAN  
P04211|LV743\_HUMAN  
A0A075B6I9|LV746\_HUMAN  
P55064|AQP5\_HUMAN  
P07951|TPM2\_HUMAN  
P09493|TPM1\_HUMAN  
P22735|TGM1\_HUMAN  
P01701|LV151\_HUMAN  
P49840|GSK3A\_HUMAN  
P0DOX3|IGD\_HUMAN  
P10809|CH60\_HUMAN  
P02679|FIBG\_HUMAN  
Q9UPP2|IQEC3\_HUMAN  
A0A075B6I0|LV861\_HUMAN  
Q86V81|THOC4\_HUMAN  
P22681|CBL\_HUMAN  
Q9BVC4|LST8\_HUMAN  
Q9BWS9|CHID1\_HUMAN  
Q7RTR2|NLRC3\_HUMAN

Q8N6G6|ATL1\_HUMAN  
P67809|YBOX1\_HUMAN  
Q8IZ21|PHAR4\_HUMAN  
Q8WXS5|CCG8\_HUMAN  
Q9ULD2|MTUS1\_HUMAN  
Q86SM8|MRGRE\_HUMAN  
Q13283|G3BP1\_HUMAN  
Q9NSA2|KCND1\_HUMAN  
Q15323|K1H1\_HUMAN  
O43790|KRT86\_HUMAN  
Q14533|KRT81\_HUMAN  
P62258|1433E\_HUMAN  
Q13228|SBP1\_HUMAN  
P78386|KRT85\_HUMAN  
P13929|ENOB\_HUMAN  
A0A0C4DH42|HV366\_HUMAN  
P02790|HEMO\_HUMAN  
P22392|NDKB\_HUMAN  
P37802|TAGL2\_HUMAN  
P29508|SPB3\_HUMAN  
P18510|IL1RA\_HUMAN  
P30041|PRDX6\_HUMAN  
P15259|PGAM2\_HUMAN  
P18669|PGAM1\_HUMAN  
P48594|SPB4\_HUMAN  
P0DP24|CALM2\_HUMAN  
P0DP23|CALM1\_HUMAN  
P0DP25|CALM3\_HUMAN  
P05387|RLA2\_HUMAN  
P04080|CYTB\_HUMAN  
P22626|ROA2\_HUMAN  
O75223|GGCT\_HUMAN  
P37837|TALDO\_HUMAN

P27482|CALL3\_HUMAN  
O00299|CLIC1\_HUMAN  
P08582|TRFM\_HUMAN  
Q9HC84|MUC5B\_HUMAN  
P0DME0|SETLP\_HUMAN  
Q01105|SET\_HUMAN  
P02511|CRYAB\_HUMAN  
P01008|ANT3\_HUMAN  
P08571|CD14\_HUMAN  
A0A075B6S9|KV137\_HUMAN  
P0DSN7|KVD37\_HUMAN  
P06454|PTMA\_HUMAN  
P08294|SODE\_HUMAN  
Q9HAV0|GBB4\_HUMAN  
P62873|GBB1\_HUMAN  
P62879|GBB2\_HUMAN  
P16520|GBB3\_HUMAN  
P25705|ATPA\_HUMAN  
P08670|VIME\_HUMAN  
P61158|ARP3\_HUMAN  
Q9H0U4|RAB1B\_HUMAN  
Q92928|RAB1C\_HUMAN  
P62820|RAB1A\_HUMAN  
Q92930|RAB8B\_HUMAN  
P61026|RAB10\_HUMAN  
P59190|RAB15\_HUMAN  
Q15286|RAB35\_HUMAN  
P51153|RAB13\_HUMAN  
P61006|RAB8A\_HUMAN  
P61160|ARP2\_HUMAN  
P06576|ATPB\_HUMAN  
P60660|MYL6\_HUMAN  
P14649|MYL6B\_HUMAN

P05386|RLA1\_HUMAN  
Q14764|MVP\_HUMAN  
Q14118|DAG1\_HUMAN  
P04217|A1BG\_HUMAN  
P36952|SPB5\_HUMAN  
Q02809|PLOD1\_HUMAN  
Q6ZVX7|FBX50\_HUMAN  
P14174|MIF\_HUMAN  
Q58FF3|ENPLL\_HUMAN  
P14625|ENPL\_HUMAN  
P25786|PSA1\_HUMAN  
O95436|NPT2B\_HUMAN  
P13489|RINI\_HUMAN  
Q9UL46|PSME2\_HUMAN  
P36955|PEDF\_HUMAN  
P60981|DEST\_HUMAN  
P62913|RL11\_HUMAN  
O75888|TNF13\_HUMAN  
P57723|PCBP4\_HUMAN  
Q15365|PCBP1\_HUMAN  
P57721|PCBP3\_HUMAN  
Q15366|PCBP2\_HUMAN  
P15309|PPAP\_HUMAN  
P62491|RB11A\_HUMAN  
Q15907|RB11B\_HUMAN  
Q13867|BLMH\_HUMAN  
P33241|LSP1\_HUMAN  
P27635|RL10\_HUMAN  
O75083|WDR1\_HUMAN  
P09467|F16P1\_HUMAN  
P02452|CO1A1\_HUMAN  
P18124|RL7\_HUMAN  
P62899|RL31\_HUMAN

P25789|PSA4\_HUMAN  
 Q9UN76|S6A14\_HUMAN  
 P06748|NPM\_HUMAN  
 O43516|WIPF1\_HUMAN  
 Q99497|PARK7\_HUMAN  
 Q86X10|RLGPB\_HUMAN  
 P40939|ECHA\_HUMAN  
 P09668|CATH\_HUMAN  
 O14497|ARI1A\_HUMAN  
 Q13200|PSMD2\_HUMAN  
 Q96SC8|DMTA2\_HUMAN  
 Q14574|DSC3\_HUMAN  
 Q9UPN9|TRI33\_HUMAN  
 P08174|DAF\_HUMAN  
 P06727|APOA4\_HUMAN  
 Q5T1R4|ZEP3\_HUMAN  
 Q96JM2|ZN462\_HUMAN  
 Q96RY5|CRML\_HUMAN  
 P04179|SODM\_HUMAN

**Subject 2**

MASTER+BS1BS1:CB440

|                    | 258                      | 262                     | 262                      | 259                     | 260                       | 262                     | 261                      | 261                      | 260                      |
|--------------------|--------------------------|-------------------------|--------------------------|-------------------------|---------------------------|-------------------------|--------------------------|--------------------------|--------------------------|
| <b>Accession</b>   | <b>Balafilco<br/>n A</b> | <b>Comfilco<br/>n A</b> | <b>Delefilco<br/>n A</b> | <b>Etafilco<br/>n A</b> | <b>Lotrafilco<br/>n B</b> | <b>Nelfilco<br/>n A</b> | <b>Nesofilco<br/>n A</b> | <b>Senofilco<br/>n A</b> | <b>Verofilco<br/>n A</b> |
| P02788 TRFL_HUMAN  | 5.644685                 | 6.48063                 | 6.093431                 | 5.97788<br>8            | 5.404873                  | 4.9491                  | 5.29803                  | 5.527466                 | 8.567646                 |
| P35527 K1C9_HUMAN  | 2.767031                 | 2.743706                | 2.7649                   | 2.72774<br>1            | 2.771539                  | 2.76224<br>3            | 2.756836                 | 2.762481                 | 2.739341                 |
| P04264 K2C1_HUMAN  | 4.436022                 | 4.384302                | 4.213545                 | 4.20677<br>5            | 4.333576                  | 4.27544                 | 4.402743                 | 4.320868                 | 4.318792                 |
| P13645 K1C10_HUMAN | 2.773293                 | 2.47186                 | 2.357781                 | 2.62808<br>9            | 2.371568                  | 2.47703<br>7            | 2.781749                 | 2.361848                 | 2.795523                 |
| P35908 K22E_HUMAN  | 3.078768                 | 2.591395                | 2.497434                 | 2.93097<br>6            | 2.578695                  | 2.75358<br>1            | 3.065732                 | 2.852403                 | 2.99409                  |

|                                         |          |          |          |                     |          |                    |          |          |          |
|-----------------------------------------|----------|----------|----------|---------------------|----------|--------------------|----------|----------|----------|
| P61626 LYSC_HUMAN                       | 6.048334 | 6.526546 | 6.697116 | 7.71321<br>3        | 5.062951 | 5.76094<br>4       | 7.566889 | 5.266971 | 7.339411 |
| P02768 ALBU_HUMAN                       | 2.8478   | 3.790709 | 3.017425 | 3.45348<br>2        | 4.348905 | 3.66443<br>7       | 3.364637 | 2.851145 | 2.585931 |
| P31025 LCN1_HUMAN                       | 5.578297 | 6.717542 | 5.48904  | 6.52648<br>9        | 5.842403 | 5.67171<br>7       | 5.741495 | 5.979437 | 5.699131 |
| P01833 PIGR_HUMAN                       | 1.873089 | 2.630185 | 1.399917 | 2.25267<br>9        | 1.843134 | 2.01481<br>7       | 1.597878 | 2.189736 | 1.742629 |
| P01876 IGHA1_HUMAN                      | 2.599109 | 3.228501 | 1.963902 | 2.76586<br>7        | 2.483815 | 2.61358<br>6       | 2.145384 | 2.797302 | 2.227979 |
| P01024 CO3_HUMAN                        | -1.51409 | -0.51946 | -2.00516 | -0.91546<br>3.06554 | -0.93243 | 0.92462<br>2.83812 | -1.49667 | -1.47418 | -1.28412 |
| P25311 ZA2G_HUMAN                       | 2.432156 | 3.351309 | 2.510742 | 1                   | 2.529098 | 3                  | 2.166594 | 2.751667 | 2.647599 |
| P04259 K2C6B_HUMAN                      | -4.90984 | -3.65618 | -3.44926 | -3.79353<br>3.49381 | -4.71527 | 4.91189            | -3.43927 | -5.18306 | -4.95241 |
| P19013 K2C4_HUMAN                       | -0.84705 | 1.217862 | -0.94502 | 8                   | -0.78918 | -0.1876<br>0.48364 | 1.104256 | 1.46855  | -0.92118 |
| P13647 K2C5_HUMAN<br>P02538 K2C6A_HUMAN | 0.423783 | 1.180108 | 0.701091 | 9                   | 0.326963 | 3                  | 1.646154 | 1.186967 | 0.084229 |
| P08727 K1C19_HUMAN                      | -2.87189 | -0.91089 | -2.59906 | 0.99833<br>4        | -2.36533 | 1.99987            | -0.64067 | -0.96458 | -2.84328 |
| P13646 K1C13_HUMAN                      | -2.09237 | 0.256151 | -1.7979  | 2.59544             | -1.53998 | 0.88481            | 0.450621 | 0.544745 | -1.943   |
| P08779 K1C16_HUMAN                      | -1.0241  | 0.327736 | 0.265874 | -0.07238<br>0.07340 | -1.06433 | 1.23328            | 0.253113 | -1.57667 | -1.14315 |
| P02533 K1C14_HUMAN                      | -0.2122  | -0.11209 | 0.031439 | 8                   | -0.62075 | -0.741             | 0.099115 | -0.37152 | -0.55042 |
| Q9UGM3 DMBT1_HUMAN                      | -1.28902 | -0.57451 | -2.15561 | -1.00418            | -2.21463 | 1.49831            | -2.0417  | -1.51002 | -0.655   |
| P02787 TRFE_HUMAN                       | -1.32497 | -0.27019 | -0.69682 | -0.33522<br>1.67060 | -0.05334 | 0.58759<br>1.57107 | -0.70354 | -1.25537 | -0.89971 |
| P0DOX7 IGK_HUMAN                        | 1.372198 | 2.001336 | 0.917551 | 5                   | 1.369322 | 2                  | 1.14258  | 1.619624 | 1.259968 |
| P98160 PGBM_HUMAN                       | -2.2288  | -1.75316 | -2.80896 | -1.41454            | -2.66245 | 2.21594            | -2.37559 | -2.39417 | -1.74311 |



|                    |          |          |          |                     |          |                    |          |          |          |
|--------------------|----------|----------|----------|---------------------|----------|--------------------|----------|----------|----------|
| P60709 ACTB_HUMAN  | -1.68028 | -0.85546 | -1.53587 | -0.13485            | -1.44707 | 1.40734            | -1.71454 | -1.27949 | -1.7432  |
| P63261 ACTG_HUMAN  | -1.68028 | -0.85546 | -1.53587 | -0.13485            | -1.44707 | 1.40734            | -1.71454 | -1.27949 | -1.7432  |
| P15924 DESP_HUMAN  | -0.09018 | 0.140108 | 0.152834 | 0.62047<br>4        | -0.2453  | 0.18169            | 0.005607 | -0.13489 | -0.20525 |
| P06733 ENOA_HUMAN  | -1.35098 | -0.31273 | -0.44513 | -0.49115<br>2.08132 | -0.75045 | 0.71021<br>1.80107 | -1.14322 | -1.1627  | -1.52151 |
| P01036 CYTS_HUMAN  | 1.673771 | 2.664357 | 1.014903 | 6<br>3.49316        | 1.438902 | 4<br>3.20607       | 2.332546 | 1.772268 | 1.504994 |
| P12273 PIP_HUMAN   | 1.787567 | 3.547882 | 2.673246 | 2<br>0.50496        | 2.713623 | 7<br>0.10997       | 2.51323  | 3.08396  | 3.091125 |
| Q13421 MSLN_HUMAN  | -0.21506 | 0.39987  | -1.06696 | 7                   | -0.22428 | 6                  | -0.5661  | -0.02246 | -0.10503 |
| P01037 CYTN_HUMAN  | -1.04155 | -0.02197 | -1.82018 | -0.68586            | -1.33237 | -0.8218            | 0.288115 | -1.02389 | -1.15816 |
| P0DOX2 IGA2_HUMAN  | -3.27986 | -2.54846 | -3.77971 | -2.81424<br>1.32802 | -3.26913 | 3.18006            | -3.53508 | -2.96269 | -3.45217 |
| P07355 ANXA2_HUMAN | -1.10167 | 0.088107 | -0.73487 | 6                   | -0.05478 | 0.51442            | -0.16396 | -0.17276 | -1.20527 |
| P00450 CERU_HUMAN  | -1.08398 | -1.22513 | -2.32886 | -0.89797            | -1.90128 | -1.7017            | -1.56616 | -1.69257 | -1.53728 |
| P06396 GELS_HUMAN  | -2.45076 | -1.89898 | -2.91194 | -1.55216            | -2.29695 | 2.22284            | -2.72167 | -2.506   | -2.57695 |
| P00738 HPT_HUMAN   | -3.63585 | -2.88588 | -3.62611 | -3.23159            | -2.49562 | 2.85286            | -3.62132 | -3.73575 | -3.73069 |
| P0DOY2 IGLC2_HUMAN | -3.95952 | -3.6127  | -4.65383 | -3.80065            | -4.15232 | 4.01195            | -4.48538 | -3.99538 | -4.07281 |
| B9A064 IGLL5_HUMAN | -1.71277 | -1.0116  | -2.3233  | -1.3341             | -1.6516  | 1.67042            | -1.99616 | -1.42376 | -1.84845 |
| P0DOX8 IGL1_HUMAN  | -1.71277 | -1.0116  | -2.3233  | -1.3341             | -1.6516  | 1.67042            | -1.99616 | -1.42376 | -1.84845 |
| P0DOX5 IGG1_HUMAN  | -1.45212 | -0.44148 | -0.91415 | -0.16174<br>0.37811 | -0.38121 | 0.60717            | -0.37333 | -1.36935 | -0.62883 |
| P10909 CLUS_HUMAN  | -0.29484 | 0.24836  | -1.11741 | 5                   | -0.6512  | 0.05792            | -0.79715 | -0.07192 | -0.23469 |
| P08729 K2C7_HUMAN  | -3.46816 | -2.42507 | -3.49049 | -0.6562<br>0.44731  | -2.61862 | 2.87241            | -2.11651 | -2.83432 | -3.79806 |
| P04083 ANXA1_HUMAN | -2.45417 | -1.06282 | -1.91146 | 8                   | -1.07215 | 1.65833            | -0.9889  | -1.22419 | -1.98398 |

|                    |          |          |          |          |          |         |          |          |          |
|--------------------|----------|----------|----------|----------|----------|---------|----------|----------|----------|
| P60174 TPIS_HUMAN  | -3.96358 | -2.95834 | -2.56056 | -2.90629 | -2.87327 | 2.99782 | -3.64193 | -3.3939  | -4.68376 |
|                    |          |          |          | 0.23392  |          |         |          |          |          |
| P14923 PLAK_HUMAN  | -0.08951 | 0.110752 | 0.06473  | 7        | -0.23665 | 0.22192 | -0.11518 | -0.0155  | -0.28578 |
| P00352 AL1A1_HUMAN | -6.97835 | -6.17881 | -6.08349 | -5.99133 | -6.3822  | 6.35897 | -6.6226  | -6.80718 | -7.00306 |
| P01871 IGHM_HUMAN  | -1.91298 | -0.78771 | -2.49821 | -1.6053  | -1.79053 | 1.61036 | -2.02652 | -1.65778 | -1.8845  |
| P14618 KPYM_HUMAN  | -2.87086 | -2.27689 | -2.6555  | -2.20074 | -3.01214 | -2.9717 | -3.15282 | -3.24392 | -3.94036 |
| P05787 K2C8_HUMAN  | -7.03801 | -5.09182 | -6.35486 | -2.92717 | -6.91777 | 5.74161 | -4.19199 | -4.87529 | -8.06203 |
|                    |          |          |          | 3.25690  |          | 2.02564 |          |          |          |
| O75556 SG2A1_HUMAN | 1.378868 | 1.925618 | 1.068987 | 6        | 0.939005 | 9       | 1.975582 | 1.823692 | 1.77353  |
| P30838 AL3A1_HUMAN | -4.0715  | -3.15118 | -3.04131 | -2.86536 | -3.66239 | 3.46313 | -3.2128  | -3.80783 | -2.84348 |
| P0DMV8 HS71A_HUMAN | -4.51857 | -3.79781 | -4.33048 | -3.17538 | -4.0476  | 4.24685 | -3.99136 | -4.03436 | -5.11322 |
| P0DMV9 HS71B_HUMAN | -4.51857 | -3.79781 | -4.33048 | -3.17538 | -4.0476  | 4.24685 | -3.99136 | -4.03436 | -5.11322 |
| Q08380 LG3BP_HUMAN | -2.15835 | -1.15496 | -2.46874 | -0.89248 | -2.07774 | 1.87867 | -1.8641  | -1.34784 | -1.55492 |
|                    |          |          |          | 3.85413  |          | 3.33033 |          |          |          |
| Q16378 PROL4_HUMAN | 2.629207 | 3.698001 | 2.218897 | 9        | 3.154548 | 4       | 3.443252 | 2.857933 | 3.655827 |
| Q04695 K1C17_HUMAN | -2.03527 | -0.86561 | -0.9908  | -0.93438 | -1.95875 | -2.0235 | -0.67201 | -2.24994 | -0.19053 |
| P68133 ACTS_HUMAN  |          |          |          |          |          |         |          |          |          |
| P68032 ACTC_HUMAN  |          |          |          |          |          |         |          |          |          |
| P04792 HSPB1_HUMAN | -1.69828 | -1.0015  | -1.24841 | -0.37762 | -1.05892 | 1.66204 | -1.28061 | -1.24158 | -1.77573 |
| P01009 A1AT_HUMAN  | -2.70756 | -1.99198 | -2.53909 | -2.20573 | -1.85892 | 2.31746 | -2.86108 | -2.74299 | -3.12715 |
| P12035 K2C3_HUMAN  | -3.92167 | -4.05976 | -5.09638 | -4.69795 | -7.04664 | 2.52367 | -4.89626 | -3.20044 | -4.17452 |
| P06702 S10A9_HUMAN | -0.82622 | -0.11437 | -0.26323 | -0.10302 | -0.0404  | 0.74337 | -0.91919 | -0.63551 | -1.3726  |
| P22079 PERL_HUMAN  | -3.28722 | -2.26227 | -3.52918 | -2.17374 | -3.0738  | 2.84544 | -3.03493 | -2.96317 | -2.33361 |
| P01859 IGHG2_HUMAN | -5.22339 | -4.00489 | -4.80035 | -4.67087 | -3.52118 | 3.98933 | -5.06136 | -5.22296 | -4.89706 |

|                    |          |          |          |          |          |          |          |          |          |
|--------------------|----------|----------|----------|----------|----------|----------|----------|----------|----------|
| P20061 TCO1_HUMAN  | -1.99674 | -0.7597  | -2.15411 | -0.89106 | -1.60081 | 1.23249  | -1.7196  | -1.34659 | -1.48863 |
| Q02413 DSG1_HUMAN  | -1.15487 | -1.07689 | -1.19763 | -1.06183 | -1.53836 | 1.23407  | -1.16581 | -1.0757  | -1.30648 |
| P19012 K1C15_HUMAN |          |          |          |          |          |          |          |          |          |
| P30740 ILEU_HUMAN  | -2.26739 | -1.38575 | -1.46359 | -1.43176 | -1.74725 | 1.99281  | -1.78752 | -1.93854 | -2.64822 |
| P80188 NGAL_HUMAN  | -1.90321 | -0.80315 | -1.24198 | -0.934   | -0.97624 | 1.09198  | -1.43914 | -1.52624 | -1.31007 |
| Q99935 PROL1_HUMAN | 0.373643 | 0.515045 | -0.71502 | 0.71713  | 7        | -0.79343 | 8        | -0.7377  | 0.025538 |
| P04406 G3P_HUMAN   | -4.85448 | -3.69051 | -3.54094 | -3.88655 | -4.5912  | 4.22906  | -4.45774 | -4.15334 | -3.11141 |
| P03973 SLPI_HUMAN  | -0.00745 | -0.10723 | 0.652627 | 1.87562  | 2        | -0.90086 | 1.01466  | 1.040857 | -1.09155 |
| P98088 MUC5A_HUMAN |          |          |          | 0.79565  |          |          |          |          |          |
| P14555 PA2GA_HUMAN | 1.139439 | 0.103566 | -1.53472 | 9        | -1.15275 | 2.23551  | -0.27264 | -0.71926 | -1.12419 |
| P01591 IGJ_HUMAN   | 2.602039 | 3.16467  | 1.936933 | 2.65048  | 3        | 2.352173 | 2        | 2.129472 | 2.774271 |
| O95968 SG1D1_HUMAN | 3.403019 | 3.676479 | 2.059463 | 4.36501  | 5        | 2.391109 | 2        | 3.292515 | 3.676723 |
| Q7Z794 K2C1B_HUMAN | -2.25886 | -2.49607 | -2.81941 | -2.73425 | -2.65949 | -2.7683  | -2.4858  | -2.89038 | -2.14404 |
| Q8N1N4 K2C78_HUMAN | -2.61985 | -2.42434 | -2.887   | -1.62961 | -2.86665 | 2.80934  | -2.31612 | -2.65254 | -2.74103 |
| P63104 I433Z_HUMAN | -3.26407 | -2.65932 | -2.75807 | -2.29554 | -2.85384 | 2.86876  | -3.19585 | -3.01522 | -4.40163 |
| P31944 CASPE_HUMAN | -4.32054 | -4.33271 | -4.35362 | -4.34684 | -4.35247 | 4.43614  | -4.50888 | -4.3373  | -4.67773 |
| Q96P63 SPB12_HUMAN | -3.94711 | -4.03626 | -3.33119 | -2.90146 | -4.52016 | 4.11305  | -2.99931 | -4.29591 | -3.31733 |
| P09228 CYTT_HUMAN  | -3.5896  | -2.46113 | -4.30754 | -3.18222 | -3.74492 | 3.42134  | -2.89878 | -3.66262 | -3.9489  |
| P09211 GSTP1_HUMAN | -3.19793 | -2.20636 | -2.08623 | -2.31255 | -2.36541 | 2.19626  | -2.95343 | -2.5657  | -3.67738 |
| Q9GZZ8 LACRT_HUMAN | 2.740472 | 3.170036 | 1.767726 | 4.10162  | 2        | 1.983699 | 4        | 2.1001   | 3.066889 |

|                                                                |          |          |          |              |          |         |          |          |          |
|----------------------------------------------------------------|----------|----------|----------|--------------|----------|---------|----------|----------|----------|
| P02647 APOA1_HUMAN                                             | -4.08951 | -3.62751 | -4.17617 | -2.89445     | -2.55776 | 2.80528 | -3.8254  | -3.87578 | -3.72193 |
| Q96DA0 ZG16B_HUMAN                                             | -1.62763 | -0.65038 | -1.92939 | -1.00581     | -1.68351 | 1.66373 | -1.57194 | -1.29859 | -0.14399 |
| P05109 S10A8_HUMAN                                             | -1.04264 | 0.099812 | 0.091498 | 0.19726<br>6 | 0.176802 | 0.54041 | -0.64761 | -0.39432 | -1.53503 |
| P07602 SAP_HUMAN<br>P05090 APOD_HUMAN                          | -2.80335 | -2.0001  | -3.28677 | -1.44048     | -2.74144 | 2.25252 | -2.59554 | -2.42533 | -2.38555 |
| P11142 HSP7C_HUMAN                                             | -5.93795 | -4.85885 | -6.03591 | -5.12531     | -5.61851 | 6.01439 | -6.03839 | -6.1863  | -5.25254 |
| Q5D862 FILA2_HUMAN                                             | -2.70228 | -2.8529  | -2.79638 | -2.71428     | -2.96121 | 3.00052 | -2.63062 | -2.95945 | -2.76573 |
| P61769 B2MG_HUMAN<br>Q01469 FABP5_HUMAN                        | -3.61403 | -2.82262 | -3.42675 | -2.60614     | -3.25344 | 3.26084 | -1.06619 | -3.20157 | -2.87063 |
| P34096 RNAS4_HUMAN<br>P07339 CATD_HUMAN                        | -3.04251 | -2.18398 | -2.74553 | -1.326       | -3.21638 | 2.91184 | -1.94964 | -3.04807 | -2.21153 |
| P30044 PRDX5_HUMAN<br>P04075 ALDOA_HUMAN                       | -3.75435 | -3.51573 | -4.04014 | -2.39726     | -3.38697 | -3.5719 | -3.34621 | -2.90807 | -3.90044 |
| P31947 I433S_HUMAN<br>Q5VTE0 EF1A3_HUMAN<br>P68104 EF1A1_HUMAN | -7.57058 | -7.05324 | -6.9499  | -6.72597     | -7.18935 | 7.17565 | -7.45487 | -6.74686 | -4.70574 |
| P31947 I433S_HUMAN<br>Q5VTE0 EF1A3_HUMAN<br>P68104 EF1A1_HUMAN | -8.7286  | -8.0668  | -8.03227 | -7.91549     | -7.93493 | 7.94259 | -8.56552 | -7.78342 | -9.58834 |
| P62937 PPIA_HUMAN                                              | -3.4592  | -2.75905 | -1.91804 | -1.97859     | -3.5599  | -3.3613 | -3.07845 | -3.10718 | -3.59262 |
| P62937 PPIA_HUMAN                                              | -3.4592  | -2.75905 | -1.91804 | -1.97859     | -3.5599  | -3.3613 | -3.07845 | -3.10718 | -3.59262 |
| P62805 H4_HUMAN                                                | -4.02542 | -2.36508 | -2.8784  | -2.27431     | -2.91055 | 2.56756 | -3.03314 | -3.04629 | -3.1156  |
| P62805 H4_HUMAN                                                | -3.56256 | -2.39084 | -3.75454 | -0.23141     | -3.63627 | 3.15166 | -1.92611 | -2.51741 | -4.54409 |
| P07737 PROF1_HUMAN                                             | -9.05087 | -7.23484 | -7.53566 | -7.80912     | -8.89478 | 8.75115 | -7.35628 | -8.20691 | -6.93831 |
| A0M8Q6 IGLC7_HUMAN                                             | -3.75494 | -2.88963 | -4.04226 | -3.28725     | -3.53407 | 3.70944 | -3.70557 | -3.43078 | -3.92577 |
| Q99456 K1C12_HUMAN                                             | -4.86072 | -5.45489 | -6.342   | -6.03028     | -7.99881 | 3.96988 | -5.48752 | -4.70912 | -4.85192 |
| Q06830 PRDX1_HUMAN                                             | -2.68563 | -2.18624 | -1.63455 | -1.63817     | -2.49256 | 2.50766 | -2.54816 | -2.48319 | -3.30826 |

|                                                                                  |                     |                      |                      |                      |                      |                    |                      |                      |                     |
|----------------------------------------------------------------------------------|---------------------|----------------------|----------------------|----------------------|----------------------|--------------------|----------------------|----------------------|---------------------|
| P30086 PEBP1_HUMAN<br>Q3SY84 K2C71_HUMAN                                         | -6.54923            | -5.27878             | -5.12286             | -5.85175             | -5.70406             | 5.71744            | -6.05424             | -6.03939             | -6.00143            |
| P02545 LMNA_HUMAN<br>P00338 LDHA_HUMAN                                           | -5.76165            | -5.09948             | -5.64691             | -2.71867             | -5.81297             | 5.77604            | -4.25156             | -4.83753             | -5.5724             |
| P01034 CYTC_HUMAN                                                                | -3.20424            | -2.48767             | -3.53325             | -2.08336             | -3.41005             | 2.80281            | -1.46504             | -3.25749             | -3.36496            |
| P68363 TBA1B_HUMAN                                                               | -7.33328            | -6.14605             | -5.61889             | -5.61132             | -6.90767             | 6.60486            | -7.25839             | -6.52109             | -7.93212            |
| P52209 6PGD_HUMAN                                                                | -6.85425            | -5.75065             | -5.94496             | -5.91607             | -6.81849             | 6.43492            | -6.80925             | -6.60953             | -5.36007            |
| Q8N474 SFRP1_HUMAN                                                               | -1.93762            | -1.77957             | -2.10606             | -2.20766             | -2.47829             | 2.83518            | -3.31619             | -2.43887             | -0.27591            |
| P01011 AACT_HUMAN                                                                | -4.57803            | -3.56693             | -4.79484             | -3.55951             | -4.21433             | 4.21162            | -4.50566             | -4.49587             | -3.97301            |
| P17931 LEG3_HUMAN<br>P01619 KV320_HUMAN<br>P11021 BIP_HUMAN<br>P00558 PGK1_HUMAN | -4.01362<br>-2.8913 | -3.56553<br>-2.05378 | -4.17359<br>-3.25251 | -3.00765<br>-2.53437 | -4.24258<br>-2.95266 | 3.70761<br>-2.8201 | -3.75596<br>-3.16572 | -4.17236<br>-2.82306 | -4.31421<br>-3.1793 |
| P07858 CATB_HUMAN                                                                | -4.64401            | -4.05908             | -4.54329             | -3.14816             | -4.36361             | 4.40501            | -4.38203             | -4.38696             | -4.23835            |
| P29401 TKT_HUMAN                                                                 | -4.91486            | -3.72346             | -3.93347             | -3.73525             | -3.5982              | 4.33464            | -4.47568             | -4.5163              | -4.82459            |
| P80303 NUCB2_HUMAN                                                               | -2.31221            | -1.74943             | -3.54961             | -1.41106             | -2.82256             | 2.08309            | -2.80051             | -2.26274             | -2.27322            |
| P15311 EZRI_HUMAN                                                                | -4.07399            | -3.4161              | -3.82236             | -2.5067              | -4.07754             | 3.84371            | -3.84523             | -3.63362             | -4.6417             |
| Q08554 DSC1_HUMAN                                                                | -2.54524            | -2.46525             | -2.26747             | -2.25551             | -2.60543             | 2.44216            | -2.3469              | -2.67772             | -2.30088            |
| Q93079 H2B1H_HUMAN                                                               | -3.09656            | -2.2951              | -3.42596             | 0.16994<br>4         | -3.47398             | 2.85986            | -1.58586             | -2.11349             | -4.72906            |
| Q5QNW6 H2B2F_HUMAN                                                               | -3.09656            | -2.2951              | -3.42596             | 0.16994<br>4         | -3.47398             | 2.85986            | -1.58586             | -2.11349             | -4.72906            |
| Q99877 H2B1N_HUMAN                                                               | -3.09656            | -2.2951              | -3.42596             | 0.16994<br>4         | -3.47398             | 2.85986            | -1.58586             | -2.11349             | -4.72906            |

|                        |          |          |          |              |          |         |          |          |          |
|------------------------|----------|----------|----------|--------------|----------|---------|----------|----------|----------|
| O60814 H2B1K_HUMAN     | -3.09656 | -2.2951  | -3.42596 | 0.16994<br>4 | -3.47398 | 2.85986 | -1.58586 | -2.11349 | -4.72906 |
| P62807 H2B1C_HUMAN     | -3.09656 | -2.2951  | -3.42596 | 0.16994<br>4 | -3.47398 | 2.85986 | -1.58586 | -2.11349 | -4.72906 |
| P58876 H2B1D_HUMAN     | -3.09656 | -2.2951  | -3.42596 | 0.16994<br>4 | -3.47398 | 2.85986 | -1.58586 | -2.11349 | -4.72906 |
| Q99880 H2B1L_HUMAN     | -3.09656 | -2.2951  | -3.42596 | 0.16994<br>4 | -3.47398 | 2.85986 | -1.58586 | -2.11349 | -4.72906 |
| P57053 H2BFS_HUMAN     | -3.09656 | -2.2951  | -3.42596 | 0.16994<br>4 | -3.47398 | 2.85986 | -1.58586 | -2.11349 | -4.72906 |
| Q99879 H2B1M_HUMAN     | -3.09656 | -2.2951  | -3.42596 | 0.16994<br>4 | -3.47398 | 2.85986 | -1.58586 | -2.11349 | -4.72906 |
| P27797 CALR_HUMAN      | -8.01761 | -6.8962  | -6.81224 | -5.96565     | -6.50505 | 6.90615 | -6.94246 | -7.47916 | -9.2837  |
| Q6UXB2 CXL17_HUMAN     | -1.63304 | -1.92634 | -0.98942 | -0.29777     | -3.06961 | 2.39602 | -2.19723 | -1.87241 | -1.38537 |
| A0A0B4J1X5 HV374_HUMAN | -4.3052  | -3.03999 | -4.51325 | -3.87347     | -4.03914 | -3.9945 | -4.30317 | -4.11183 | -4.28621 |
| P06744 G6PI_HUMAN      | -7.41049 | -7.28605 | -6.48306 | -7.38829     | -6.90467 | 6.91108 | -7.44318 | -7.23629 | -7.31589 |
| P05783 K1C18_HUMAN     | -3.8259  | -3.79595 | -4.76641 | -4.18104     | -5.69169 | 3.20481 | -4.33113 | -3.5517  | -4.00871 |
| P01040 CYTA_HUMAN      | -6.22753 | -5.93206 | -5.27813 | -6.37859     | -6.37617 | 5.90137 | -6.52378 | -5.96185 | -6.17407 |
| P40394 ADH7_HUMAN      |          |          |          |              |          |         |          |          |          |
| A0A0B4J1V0 HV315_HUMAN |          |          |          |              |          |         |          |          |          |
| P80748 LV321_HUMAN     | -4.3328  | -3.62857 | -4.32415 | -3.71282     | -4.12178 | 4.21482 | -4.29745 | -3.948   | -4.47178 |
| P62979 RS27A_HUMAN     | -3.32143 | -2.99934 | -3.3064  | -2.2145      | -3.47555 | -3.2169 | -3.15488 | -3.03729 | -3.78072 |
| P62987 RL40_HUMAN      | -3.32143 | -2.99934 | -3.3064  | -2.2145      | -3.47555 | -3.2169 | -3.15488 | -3.03729 | -3.78072 |
| P0CG47 UBB_HUMAN       | -3.32143 | -2.99934 | -3.3064  | -2.2145      | -3.47555 | -3.2169 | -3.15488 | -3.03729 | -3.78072 |
| P0CG48 UBC_HUMAN       | -3.32143 | -2.99934 | -3.3064  | -2.2145      | -3.47555 | -3.2169 | -3.15488 | -3.03729 | -3.78072 |
| P16403 H12_HUMAN       |          |          |          |              |          |         |          |          |          |
| P27348 1433T_HUMAN     | -7.54949 | -7.38668 | -7.43786 | -6.95956     | -7.82178 | 7.30544 | -8.07236 | -7.93493 | -7.90675 |
| P07237 PDIA1_HUMAN     | -5.50881 | -4.72194 | -5.80477 | -4.03654     | -5.09328 | 5.55623 | -5.04945 | -5.17542 | -6.03105 |

|                        |          |          |          |          |          |         |          |          |          |
|------------------------|----------|----------|----------|----------|----------|---------|----------|----------|----------|
| P00751 CFAB_HUMAN      | -4.83629 | -3.99068 | -4.68382 | -3.59202 | -4.33559 | 4.36828 | -4.47666 | -4.70346 | -4.25816 |
| P06312 KV401_HUMAN     | -4.99956 | -4.16459 | -5.61335 | -4.70859 | -4.83591 | 4.80126 | -5.17777 | -4.61425 | -5.19094 |
| P02765 FETUA_HUMAN     | -6.15897 | -6.32132 | -6.95478 | -5.8656  | -6.44744 | 6.19753 | -6.82747 | -6.8604  | -6.87279 |
| P10412 H14_HUMAN       | -6.97356 | -5.70118 | -6.7559  | -4.02375 | -6.79607 | 6.31359 | -5.55048 | -6.01649 | -8.61271 |
| P31941 ABC3A_HUMAN     | -4.05254 | -4.03633 | -3.76587 | -3.64682 | -4.61031 | 4.21874 | -3.44855 | -4.20827 | -4.29985 |
| P55058 PLTP_HUMAN      | -4.14351 | -4.12887 | -5.59255 | -4.15863 | -5.95863 | 3.88149 | -5.13689 | -4.09753 | -4.48095 |
| P01615 KVD28_HUMAN     | -9.89306 | -8.03161 | -9.56396 |          | -8.71988 | 9.04574 | -9.58374 | -8.33379 | -9.01603 |
| A0A075B6P5 KV228_HUMAN | -9.89306 | -8.03161 | -9.56396 |          | -8.71988 | 9.04574 | -9.58374 | -8.33379 | -9.01603 |
| P81605 DCD_HUMAN       | -1.44531 | -1.09814 | -1.89287 | -1.0491  | -1.89717 | -1.5677 | -1.82106 | -1.26955 | -1.5501  |
| P02774 VTDB_HUMAN      |          |          |          |          |          |         |          |          |          |
| P14550 AK1A1_HUMAN     |          |          |          |          |          |         |          |          |          |
| A0A0B4J1Y9 HV372_HUMAN |          |          |          |          |          |         |          |          |          |
| P32119 PRDX2_HUMAN     | -4.48851 | -4.558   | -4.28797 | -4.44671 | -4.63341 | 4.59216 | -4.42714 | -4.40367 | -4.57194 |
| P26447 S10A4_HUMAN     | -2.12036 | -1.07603 | -2.14628 | 0.48242  | -1.48022 | 1.77335 | -1.28134 | -1.32087 | -3.36325 |
| P31151 S10A7_HUMAN     |          |          |          | 3        |          |         |          |          |          |
| Q15517 CDSN_HUMAN      | -4.39066 | -4.2852  | -4.12341 | -4.28768 | -4.60994 | 4.49695 | -4.40302 | -4.31269 | -4.00891 |
| P20930 FILA_HUMAN      | -2.74606 | -2.98885 | -2.79404 | -2.75008 | -2.85591 | 2.93222 | -2.94177 | -3.31425 | -2.81324 |
| P0DP08 HVD82_HUMAN     | -5.17815 | -3.55752 | -4.9783  | -3.88277 | -4.31272 | 4.08661 | -4.47    | -3.77851 | -4.43941 |
| P01825 HV459_HUMAN     | -5.17815 | -3.55752 | -4.9783  | -3.88277 | -4.31272 | 4.08661 | -4.47    | -3.77851 | -4.43941 |
| P0DP07 HV431_HUMAN     | -5.17815 | -3.55752 | -4.9783  | -3.88277 | -4.31272 | 4.08661 | -4.47    | -3.77851 | -4.43941 |
| A0A0C4DH41 HV461_HUMAN | -5.17815 | -3.55752 | -4.9783  | -3.88277 | -4.31272 | 4.08661 | -4.47    | -3.77851 | -4.43941 |

|                        |          |          |          |          |          |         |          |          |          |
|------------------------|----------|----------|----------|----------|----------|---------|----------|----------|----------|
| P0DP06 HVD34_HUMAN     | -5.17815 | -3.55752 | -4.9783  | -3.88277 | -4.31272 | 4.08661 | -4.47    | -3.77851 | -4.43941 |
| P06331 HV434_HUMAN     | -5.17815 | -3.55752 | -4.9783  | -3.88277 | -4.31272 | 4.08661 | -4.47    | -3.77851 | -4.43941 |
| P01824 HV439_HUMAN     | -5.17815 | -3.55752 | -4.9783  | -3.88277 | -4.31272 | 4.08661 | -4.47    | -3.77851 | -4.43941 |
| A0A0A0MRZ8 KVD11_HUMAN | -3.62382 | -2.75842 | -3.82575 | -3.21733 | -3.45199 | 3.37961 | -4.02585 | -3.21023 | -3.83798 |
| P04433 KV311_HUMAN     | -3.62382 | -2.75842 | -3.82575 | -3.21733 | -3.45199 | 3.37961 | -4.02585 | -3.21023 | -3.83798 |
| P31949 S10AB_HUMAN     | -6.49841 | -5.64461 | -6.43327 | -3.3646  | -5.46659 | -5.8031 | -5.54138 | -5.40974 | -4.38652 |
| P60953 CDC42_HUMAN     |          |          |          |          |          |         |          |          |          |
| Q6KB66 K2C80_HUMAN     |          |          |          |          |          |         |          |          |          |
| P10599 THIO_HUMAN      | -3.98922 | -3.45196 | -3.886   | -3.59964 | -3.70098 | 3.53439 | -2.85072 | -3.88333 | -4.26743 |
| P40925 MDHC_HUMAN      |          |          |          |          |          |         |          |          |          |
| Q14515 SPRL1_HUMAN     | -3.60219 | -3.15856 | -3.1492  | -2.92998 | -3.80616 | 3.54433 | -3.48561 | -3.54795 | -1.69571 |
| A0A075B6S5 KV127_HUMAN | -5.67315 | -5.2259  | -6.4338  | -5.4315  | -6.38825 | 5.42701 | -4.46467 | -5.54763 | -6.00711 |
| P01742 HV169_HUMAN     | -2.66521 | -1.85928 | -3.25885 | -2.1369  | -2.47611 | 2.42676 | -2.96573 | -2.37178 | -2.69849 |
| A0A0C4DH31 HV118_HUMAN | -5.49806 | -5.04781 | -6.87507 | -5.65591 | -5.90505 | 5.73998 | -6.27927 | -5.55426 | -6.307   |
| P23083 HV102_HUMAN     | -5.49806 | -5.04781 | -6.87507 | -5.65591 | -5.90505 | 5.73998 | -6.27927 | -5.55426 | -6.307   |
| P07900 HS90A_HUMAN     |          |          |          |          |          |         |          |          |          |
| P84243 H33_HUMAN       | -5.18693 | -4.22632 | -5.81802 | -2.52882 | -5.9327  | 4.99728 | -4.11258 | -4.36105 | -6.89592 |
| P01700 LV147_HUMAN     | -4.2826  | -3.68311 | -4.79292 | -3.98263 | -4.47394 | 4.36898 | -4.61047 | -4.23752 | -4.83324 |
| P23528 COF1_HUMAN      | -4.26877 | -3.87108 | -4.16657 | -3.68555 | -4.07095 | -4.043  | -4.13036 | -4.37264 | -5.44196 |
| P21980 TGM2_HUMAN      |          |          |          |          |          |         |          |          |          |
| Q09666 AHNK_HUMAN      | -4.67993 | -3.99446 | -4.8216  | -1.98413 | -4.50683 | 4.69093 | -4.04517 | -3.97776 | -5.49348 |
| P01624 KV315_HUMAN     | -5.46325 | -4.9535  | -6.3038  | -5.30014 | -5.66796 | 5.59507 | -5.97791 | -5.35638 | -5.9798  |



|                        |          |          |          |          |          |         |          |          |          |
|------------------------|----------|----------|----------|----------|----------|---------|----------|----------|----------|
| P07384 CAN1_HUMAN      | -8.11176 | -7.70881 | -7.27626 | -7.76558 | -8.13608 | 8.53675 | -8.18625 | -7.9899  | -5.11624 |
| Q6UWP8 SBSN_HUMAN      | -7.26088 | -9.00928 | -6.65446 | -6.49573 | -7.52108 | 7.49844 | -7.48813 | -8.02811 | -6.93709 |
| Q8NBJ4 GOLM1_HUMAN     | -3.95918 | -3.20113 | -4.58587 | -3.18636 | -4.04794 | 3.99843 | -3.95802 | -3.80273 | -4.30525 |
| P40926 MDHM_HUMAN      |          |          |          |          |          |         |          |          |          |
| P68371 TBB4B_HUMAN     |          |          |          |          |          |         |          |          |          |
| A0A0A0MS15 HV349_HUMAN | -6.23233 | -4.66726 | -6.15526 | -5.38777 | -6.11189 | 5.74982 | -6.34585 | -5.39309 | -5.68988 |
| P01593 KVD33_HUMAN     | -5.27848 | -4.93275 | -4.97787 | -4.96577 | -5.94854 | 6.28293 | -5.89557 | -5.43136 | -2.4922  |
| P01594 KV133_HUMAN     | -5.27848 | -4.93275 | -4.97787 | -4.96577 | -5.94854 | 6.28293 | -5.89557 | -5.43136 | -2.4922  |
| P02766 TTHY_HUMAN      |          |          |          |          |          |         |          |          |          |
| Q08188 TGM3_HUMAN      | -6.18664 | -6.85132 | -6.74376 | -6.44831 | -6.78445 | 6.17526 | -6.24436 | -6.77573 | -6.44642 |
| P05089 ARGI1_HUMAN     | -5.08345 | -5.54309 | -5.84305 | -6.01484 | -5.84217 | 5.71381 | -5.56698 | -5.33983 | -5.74978 |
| Q9UBT3 DKK4_HUMAN      | -4.61828 | -5.37693 | -5.42407 | -5.08332 | -5.31641 | 6.34033 | -5.81898 | -5.68149 | -3.36796 |
| O00584 RNT2_HUMAN      | -7.36287 | -5.86128 | -7.06823 | -6.07311 | -6.76414 | 6.37973 | -7.00827 | -6.43829 | -6.59461 |
| A0A0B4J2D9 KVD13_HUMAN |          |          |          |          |          |         |          |          |          |
| P0DP09 KV113_HUMAN     |          |          |          |          |          |         |          |          |          |
| O75874 IDHC_HUMAN      |          |          |          |          |          |         |          |          |          |
| P15814 IGLL1_HUMAN     | -1.2897  | -0.64156 | -1.96492 | -0.81818 | -1.42151 | 1.34051 | -1.57917 | -0.97816 | -1.52283 |
| P30085 KCY_HUMAN       |          |          |          |          |          |         |          |          |          |
| A0A0C4DH34 HV428_HUMAN | -5.92066 | -4.63227 | -5.48728 | -4.89509 | -5.42763 | 5.11199 | -5.51386 | -5.09837 | -5.69898 |
| P30101 PDIA3_HUMAN     | -6.61721 | -5.81353 | -5.93559 | -4.59006 | -5.57371 | 5.84301 | -5.54271 | -5.78894 | -6.59167 |
| Q14697 GANAB_HUMAN     |          |          |          |          |          |         |          |          |          |
| P12830 CADH1_HUMAN     | -5.44358 | -5.75053 | -6.04007 | -5.02103 | -6.52047 | 7.91992 | -5.13407 | -6.54863 | -4.76669 |

|                        |          |          |          |          |          |         |          |          |          |
|------------------------|----------|----------|----------|----------|----------|---------|----------|----------|----------|
| Q16651 PRSS8_HUMAN     | -3.72599 | -3.18484 | -4.26402 | -3.31165 | -3.4568  | 3.66928 | -4.33152 | -3.58223 | -4.12473 |
| P13987 CD59_HUMAN      | -5.38566 | -4.87716 | -5.7195  | -4.31926 | -5.8659  | 5.50629 | -5.52724 | -5.31089 | -5.77939 |
| O43653 PSCA_HUMAN      | -5.49089 | -5.16512 | -5.17474 | -3.33056 | -5.79703 | 4.76615 | -5.39521 | -4.99047 | -5.56734 |
| P02763 A1AG1_HUMAN     |          |          |          |          |          |         |          |          |          |
| A0A0B4J1V6 HV373_HUMAN | -5.83353 | -5.47468 | -6.18378 | -5.68245 | -6.01039 | -5.6414 | -6.06715 | -5.70362 | -5.93903 |
| O43852 CALU_HUMAN      | -9.24874 | -8.37664 | -6.74344 | -7.75013 | -8.08858 | 8.30305 | -9.24476 | -9.25096 | -9.34513 |
| P08758 ANXA5_HUMAN     |          |          |          |          |          |         |          |          |          |
| Q5T749 KPRP_HUMAN      | -5.18148 | -6.3469  | -6.24756 | -6.04658 | -6.29434 | 6.85159 | -5.98212 | -6.13587 | -6.08766 |
| Q7Z5P9 MUC19_HUMAN     | -4.61507 | -4.05332 | -4.08289 | -3.46831 | -4.8003  | 4.82876 | -3.77325 | -4.71829 | -2.38295 |
| P01714 LV319_HUMAN     | -5.29614 | -4.57128 | -5.46803 | -4.89671 | -5.39859 | 5.05133 | -5.43998 | -5.23346 | -5.35384 |
| P01717 LV325_HUMAN     | -4.87676 | -4.41881 | -5.82474 | -4.83486 | -5.15219 | 5.08055 | -5.46052 | -4.88312 | -5.17802 |
| A0A075B6K4 LV310_HUMAN | -4.87676 | -4.41881 | -5.82474 | -4.83486 | -5.15219 | 5.08055 | -5.46052 | -4.88312 | -5.17802 |
| P23284 PPIB_HUMAN      | -4.06157 | -4.3104  | -4.83947 | -4.14589 | -4.52023 | 4.34697 | -4.36835 | -4.13568 | -4.05177 |
| P12814 ACTN1_HUMAN     |          |          |          |          |          |         |          |          |          |
| P40199 CEAM6_HUMAN     |          |          |          |          |          |         |          |          |          |
| Q02818 NUCB1_HUMAN     | -5.69124 | -5.52485 | -7.27724 | -5.15481 | -6.09189 | 5.54785 | -6.18925 | -5.71959 | -5.56485 |
| P49788 TIG1_HUMAN      |          |          |          |          |          |         |          |          |          |
| P06703 S10A6_HUMAN     | -5.85421 | -4.79576 | -5.43012 | -4.41891 | -4.80464 | 4.83776 | -5.06646 | -5.57781 | -6.57036 |
| P16401 H15_HUMAN       | -6.33192 | -6.10909 | -6.68398 | -3.39384 | -6.99376 | 6.79095 | -5.46629 | -5.85368 | -7.82121 |
| O60437 PEPL_HUMAN      | -7.32376 | -6.80164 | -6.85193 | -5.10704 | -7.46575 | 7.08692 | -6.87395 | -6.67536 | -8.06299 |
| P47929 LEG7_HUMAN      |          |          |          |          |          |         |          |          |          |
| Q14508 WFDC2_HUMAN     | -4.33381 | -6.35575 | -8.21145 | -7.96192 | -5.82737 | 7.73848 | -6.54284 | -8.3149  | -7.38706 |

|                    |          |          |          |          |          |         |          |          |          |
|--------------------|----------|----------|----------|----------|----------|---------|----------|----------|----------|
| Q13835 PKP1_HUMAN  |          |          |          |          |          |         |          |          |          |
| P02750 A2GL_HUMAN  |          |          |          |          |          |         |          |          |          |
| P21926 CD9_HUMAN   |          |          |          |          |          |         |          |          |          |
| P19961 AMY2B_HUMAN |          |          |          |          |          |         |          |          |          |
| P0DTE7 AMY1B_HUMAN |          |          |          |          |          |         |          |          |          |
| P04746 AMYP_HUMAN  |          |          |          |          |          |         |          |          |          |
| P04745 AMY1A_HUMAN |          |          |          |          |          |         |          |          |          |
| P0DTE8 AMY1C_HUMAN |          |          |          |          |          |         |          |          |          |
| Q9UBC9 SPRR3_HUMAN | -4.96292 | -3.88817 | -4.66907 | -2.93945 | -4.55817 | 4.48638 | -4.33264 | -4.49716 | -4.71037 |
| Q96QA5 GSDMA_HUMAN | -6.41383 | -6.61264 | -6.94885 | -7.11929 | -6.75398 | 6.74054 | -6.9464  | -6.81629 | -6.52153 |
| Q13296 SG2A2_HUMAN |          |          |          |          |          |         |          |          |          |
| Q14002 CEAM7_HUMAN |          |          |          |          |          |         |          |          |          |
| P62753 RS6_HUMAN   | -6.46497 | -5.53206 | -6.54263 | -4.94145 | -6.76313 | -6.1819 | -5.93411 | -6.15132 | -6.82296 |
| P09429 HMGB1_HUMAN | -4.61973 | -3.52519 | -5.50652 | -3.91226 | -4.90374 | 4.99179 | -4.90028 | -4.40279 | -6.92552 |
| P83731 RL24_HUMAN  | -3.64261 | -2.78345 | -3.9637  | -2.75841 | -3.54812 | 3.82614 | -3.43422 | -3.56745 | -5.51431 |
| Q96S96 PEBP4_HUMAN |          |          |          |          |          |         |          |          |          |
| Q5SNV9 CA167_HUMAN |          |          |          |          |          |         |          |          |          |
| Q6ZR08 DYH12_HUMAN |          |          |          |          |          |         |          |          |          |
| P07910 HNRPC_HUMAN |          |          |          |          |          |         |          |          |          |
| Q9UKZ1 CNO11_HUMAN |          |          |          |          |          |         |          |          |          |
| P20933 ASPG_HUMAN  | -6.00335 | -5.22531 | -6.17846 | -4.89334 | -5.38554 | 5.97185 | -5.66205 | -5.71521 | -7.01675 |
| Q8IZL8 PELP1_HUMAN |          |          |          |          |          |         |          |          |          |
| P00505 AATM_HUMAN  |          |          |          |          |          |         |          |          |          |
| P48634 PRC2A_HUMAN |          |          |          |          |          |         |          |          |          |
| Q96G74 OTUD5_HUMAN |          |          |          |          |          |         |          |          |          |
| Q8IVF2 AHNK2_HUMAN |          |          |          |          |          |         |          |          |          |
| Q8TF72 SHRM3_HUMAN |          |          |          |          |          |         |          |          |          |
| Q14966 ZN638_HUMAN |          |          |          |          |          |         |          |          |          |
| Q7LBE3 S26A9_HUMAN |          |          |          |          |          |         |          |          |          |

|                        |          |          |          |          |          |         |          |          |          |
|------------------------|----------|----------|----------|----------|----------|---------|----------|----------|----------|
| A6NKD9 CC85C_HUMAN     |          |          |          |          |          |         |          |          |          |
| A0A0B4J1U7 HV601_HUMAN |          |          |          |          |          |         |          |          |          |
| Q6PID8 KLD10_HUMAN     |          |          |          |          |          |         |          |          |          |
| Q99574 NEUS_HUMAN      | -8.52674 | -7.77156 | -7.93474 | -7.23589 | -8.2585  | 8.00804 | -7.8688  | -7.83724 | -8.03226 |
| Q14526 HIC1_HUMAN      |          |          |          |          |          |         |          |          |          |
| Q5VSY0 GKAP1_HUMAN     |          |          |          |          |          |         |          |          |          |
| Q8TCU6 PREX1_HUMAN     |          |          |          |          |          |         |          |          |          |
| Q7Z2W7 TRPM8_HUMAN     |          |          |          |          |          |         |          |          |          |
| Q14106 TOB2_HUMAN      |          |          |          |          |          |         |          |          |          |
| Q9GZQ3 COMD5_HUMAN     |          |          |          |          |          |         |          |          |          |
| Q8NHQ8 RASF8_HUMAN     |          |          |          |          |          |         |          |          |          |
| P01703 LV140_HUMAN     |          |          |          |          |          |         |          |          |          |
| O75882 ATRN_HUMAN      |          |          |          |          |          |         |          |          |          |
| O60902 SHOX2_HUMAN     |          |          |          |          |          |         |          |          |          |
| Q5VSP4 LC1L1_HUMAN     | -4.5276  | -3.86731 | -4.87759 | -3.7678  | -4.4547  | 4.50446 | -5.08391 | -4.49022 | -4.2846  |
| P01861 IGHG4_HUMAN     | -6.33406 | -5.08766 | -5.85803 | -4.98139 | -4.69056 | 4.96464 | -5.78652 | -5.9092  | -5.81118 |
| O95678 K2C75_HUMAN     | -4.27939 | -4.06688 | -4.93008 | -4.43863 | -6.14438 | 3.14709 | -4.49012 | -3.82082 | -4.07595 |
| P0DOX6 IGM_HUMAN       | -3.7822  | -3.23599 | -4.14569 | -2.98589 | -3.94393 | 3.60506 | -4.31534 | -3.69323 | -4.12857 |
| Q86YZ3 HORN_HUMAN      | -5.12948 | -5.74736 | -5.3587  | -5.60053 | -5.80899 | 5.06065 | -5.90778 | -5.80279 | -4.69507 |
| Q14525 KT33B_HUMAN     | -5.49679 | -6.03605 | -7.32674 | -6.83609 | -8.66626 | 5.57636 | -6.57689 | -5.33472 | -5.66064 |
| Q562R1 ACTBL_HUMAN     | -7.70596 | -5.5056  | -7.05125 | -6.71323 | -7.41089 | 6.63564 | -7.06945 | -6.7263  | -7.31477 |
| P31946 1433B_HUMAN     | -8.59244 | -8.25918 | -8.30963 | -8.08167 | -8.10245 | 7.97417 | -9.11546 | -8.59602 | -10.0516 |
| Q7Z3Y8 K1C27_HUMAN     | -3.93016 | -3.06254 | -3.99271 | -3.62046 | -4.27784 | 2.85182 | -3.76216 | -3.61096 | -3.944   |
| P01780 HV307_HUMAN     | -4.71971 | -4.28631 | -5.11316 | -4.52874 | -4.84144 | 4.76795 | -4.83208 | -4.58348 | -4.68604 |

|                        |          |          |          |          |          |         |          |          |          |
|------------------------|----------|----------|----------|----------|----------|---------|----------|----------|----------|
| A0A0J9YX35 HV64D_HUMAN | -4.34356 | -3.52108 | -4.82345 | -3.98193 | -4.3827  | 4.09228 | -4.80167 | -3.90306 | -4.47966 |
| A0A0J9YXX1 HV5X1_HUMAN | -6.04259 | -4.74196 | -6.57115 | -5.13202 | -6.17185 | 5.60193 | -6.14068 | -5.90007 | -6.05779 |
| A0A0C4DH38 HV551_HUMAN | -4.13295 | -3.68476 | -4.79969 | -4.11811 | -4.23194 | 4.43096 | -4.71867 | -4.35439 | -4.46492 |
| P28799 GRN_HUMAN       | -4.83206 | -4.2053  | -5.51538 | -4.13396 | -4.8907  | 4.53817 | -4.90358 | -4.7883  | -4.71494 |
| P01762 HV311_HUMAN     | -7.06962 | -6.44133 | -8.08236 | -6.8623  | -7.40071 | 7.31374 | -7.66004 | -6.74766 | -7.31228 |
| Q7Z3Y9 K1C26_HUMAN     | -4.29899 | -5.09886 | -6.32418 | -6.03684 | -6.97923 | 4.45437 | -6.00669 | -4.90989 | -4.27801 |
| Q15149 PLEC_HUMAN      | -6.00897 | -4.99072 | -5.02309 | -3.61484 | -5.79636 | 5.83895 | -4.74214 | -5.45662 | -5.62718 |
| Q7Z406 MYH14_HUMAN     | -9.23599 | -8.48729 | -9.41594 | -7.23875 | -9.20901 | 9.34018 | -8.27705 | -8.82427 |          |
| P06731 CEAM5_HUMAN     | -4.90208 | -4.02343 | -5.46462 | -3.68337 | -5.9798  | 4.67267 | -3.89381 | -4.56851 | -4.80579 |
| P04632 CPNS1_HUMAN     | -7.65178 | -8.09023 | -7.81741 | -6.07824 | -7.88049 | -7.9177 | -7.166   | -7.39895 | -5.98068 |
| Q07666 KHDR1_HUMAN     | -6.48146 | -4.1332  | -3.70315 | -4.10789 | -5.4187  | 5.55449 | -5.76406 | -4.97548 | -4.73494 |
| O60716 CTND1_HUMAN     |          | -3.98036 | -3.82668 | -4.09438 | -6.13449 | 5.26265 | -6.89705 | -5.10933 |          |
| P01611 KVD12_HUMAN     | -8.20977 | -6.89057 | -8.69797 | -7.15567 | -8.25947 | 8.27202 | -7.8957  | -7.39672 | -7.48036 |
| A0A0C4DH72 KV106_HUMAN | -6.39876 | -6.52472 | -7.82566 | -6.59772 | -7.22524 | 7.02059 | -7.2586  | -7.39859 | -7.53316 |
| P08246 ELNE_HUMAN      | -6.20688 | -7.3458  | -6.27442 | -5.8725  | -6.5735  | -7.4095 | -6.83358 | -7.94989 | -7.41833 |
| A0A075B6R9 KVD24_HUMAN | -7.08838 | -6.09244 | -6.82254 | -6.57223 | -6.69268 | 6.67298 | -6.95909 | -6.42143 | -7.12268 |
| A0A0C4DH68 KV224_HUMAN | -7.08838 | -6.09244 | -6.82254 | -6.57223 | -6.69268 | 6.67298 | -6.95909 | -6.42143 | -7.12268 |
| P40121 CAPG_HUMAN      | -5.30394 | -4.53232 | -5.04785 | -4.08616 | -4.91161 | 4.94835 | -4.99627 | -5.09653 | -5.90549 |
| O76021 RL1D1_HUMAN     |          | -7.9904  | -6.90927 | -7.57424 | -9.47659 | 8.62442 | -9.42683 | -9.15607 | -10.2    |
| A0A075B6H7 KV37_HUMAN  | -6.68794 | -6.11383 | -7.38272 | -6.80342 | -7.13297 | -6.9296 | -7.62515 | -6.83478 | -7.29292 |

|                        |          |          |          |          |          |         |          |          |          |
|------------------------|----------|----------|----------|----------|----------|---------|----------|----------|----------|
| P42357 HUTH_HUMAN      | -9.99312 |          | -8.93402 |          |          | 9.94252 | -9.7031  | -9.26993 | -9.13606 |
| P13797 PLST_HUMAN      | -6.54708 | -6.47048 | -6.12106 | -6.17777 | -5.76501 | 6.43911 | -6.42112 | -6.66661 | -8.1963  |
| P04211 LV743_HUMAN     | -4.20688 | -3.36093 | -4.55042 | -3.86973 | -3.98216 | 3.99061 | -4.32686 | -3.85257 | -4.6045  |
| A0A075B6I9 LV746_HUMAN | -4.20688 | -3.36093 | -4.55042 | -3.86973 | -3.98216 | 3.99061 | -4.32686 | -3.85257 | -4.6045  |
| P55064 AQP5_HUMAN      | -3.77447 | -3.78543 | -4.53367 | -2.7301  | -5.00583 | 4.21482 | -4.57637 | -4.02614 | -4.88084 |
| P07951 TPM2_HUMAN      | -6.11573 | -6.01546 | -6.30295 | -4.86639 | -6.25281 | 6.23608 | -5.69519 | -6.66511 | -6.56158 |
| P09493 TPM1_HUMAN      | -6.11573 | -6.01546 | -6.30295 | -4.86639 | -6.25281 | 6.23608 | -5.69519 | -6.66511 | -6.56158 |
| P22735 TGM1_HUMAN      | -6.19873 | -5.87317 | -6.6017  | -5.83789 | -6.65129 | 6.54469 | -6.19244 | -6.36834 | -6.09709 |
| P01701 LV151_HUMAN     | -5.61438 | -4.87909 | -5.08584 | -4.38356 | -5.84486 | 5.21811 | -4.72622 | -5.71521 | -4.78396 |
| P49840 GSK3A_HUMAN     | -7.20523 | -6.19377 | -6.13869 | -6.07937 | -6.44942 | 6.39957 | -6.57338 | -6.65002 | -5.92998 |
| P0DOX3 IGD_HUMAN       | -5.7669  | -4.16317 | -5.49522 | -4.67414 | -5.06453 | 4.68972 | -5.37472 | -4.85631 | -5.25898 |
| P10809 CH60_HUMAN      |          | -8.20535 | -6.8819  | -8.01071 | -9.37645 | 9.38952 | -9.49389 | -9.44992 |          |
| P02679 FIBG_HUMAN      | -6.86003 | -5.83224 | -6.80972 | -5.78279 | -5.87137 | 5.71254 | -6.87339 | -6.47273 | -5.59247 |
| Q9UPP2 IQEC3_HUMAN     | -5.22013 | -4.51923 | -5.02496 | -5.16431 | -5.12399 | 5.49564 | -5.88073 | -5.23526 | -2.44936 |
| A0A075B6I0 LV861_HUMAN | -3.49525 | -2.52952 | -3.31874 | -2.91493 | -3.2434  | 3.09514 | -3.423   | -3.13773 | -3.90906 |
| Q86V81 THOC4_HUMAN     | -8.24703 | -7.9458  | -7.47535 | -7.5388  | -8.46695 | 7.58402 | -7.69348 | -8.27908 | -9.01438 |
| P22681 CBL_HUMAN       | -7.53727 | -6.87269 | -6.94633 | -7.06589 | -7.43734 | -7.6032 | -8.57561 | -7.99719 | -5.05779 |
| Q9BVC4 LST8_HUMAN      |          | -8.95616 |          |          |          |         |          |          |          |
| Q9BWS9 CHID1_HUMAN     | -10.0248 | -7.74539 |          | -8.98007 | -9.01323 | 9.10672 |          |          | -6.35056 |
| Q7RTR2 NLRC3_HUMAN     | -6.60015 | -5.48042 | -7.37671 | -7.02116 | -7.15808 | 6.46518 | -7.30151 | -6.00478 | -1.72842 |

|                        |          |          |          |          |          |         |          |          |          |
|------------------------|----------|----------|----------|----------|----------|---------|----------|----------|----------|
| Q8N6G6 ATL1_HUMAN      | -6.89804 | -6.07194 | -6.10256 | -6.05751 | -6.72836 | 6.44148 | -6.58628 | -6.74784 | -5.48071 |
| P67809 YBOX1_HUMAN     | -7.5985  | -7.06926 | -4.22303 | -6.40621 | -7.05964 | 7.39339 | -8.64999 | -6.84876 | -6.30241 |
| Q8IZ21 PHAR4_HUMAN     | -7.21164 | -6.88038 | -7.78519 | -6.74849 | -7.555   | 7.31959 | -7.18459 | -6.76771 | -6.49186 |
| Q8WXS5 CCG8_HUMAN      |          |          | -9.71987 |          |          |         |          |          | -8.73639 |
| Q9ULD2 MTUS1_HUMAN     | -4.60612 | -4.07578 | -5.29717 | -5.01951 | -6.63726 | 4.66869 | -5.99067 | -4.1851  | -2.2853  |
| Q86SM8 MRGRE_HUMAN     | -4.85859 | -4.67493 | -5.85126 | -4.66818 | -5.03367 | 5.20659 | -6.02787 | -5.03181 | -5.06198 |
| Q13283 G3BP1_HUMAN     |          | -8.25904 | -5.97818 | -7.41723 | -7.8649  | 8.86782 | -9.10117 | -8.7714  | -9.26291 |
| Q9NSA2 KCND1_HUMAN     | -7.09666 | -6.89081 | -7.88705 | -7.81238 |          | 5.65148 | -7.74884 | -6.34201 | -6.43023 |
| Q15323 K1H1_HUMAN      |          |          |          |          |          |         |          |          |          |
| O43790 KRT86_HUMAN     |          |          |          |          |          |         |          |          |          |
| Q14533 KRT81_HUMAN     |          |          |          |          |          |         |          |          |          |
| P62258 1433E_HUMAN     |          |          |          |          |          |         |          |          |          |
| Q13228 SBP1_HUMAN      |          |          |          |          |          |         |          |          |          |
| P78386 KRT85_HUMAN     |          |          |          |          |          |         |          |          |          |
| P13929 ENOB_HUMAN      |          |          |          |          |          |         |          |          |          |
| A0A0C4DH42 HV366_HUMAN |          |          |          |          |          |         |          |          |          |
| P02790 HEMO_HUMAN      |          |          |          |          |          |         |          |          |          |
| P22392 NDKB_HUMAN      |          |          |          |          |          |         |          |          |          |
| P37802 TAGL2_HUMAN     |          |          |          |          |          |         |          |          |          |
| P29508 SPB3_HUMAN      |          |          |          |          |          |         |          |          |          |
| P18510 IL1RA_HUMAN     |          |          |          |          |          |         |          |          |          |
| P30041 PRDX6_HUMAN     |          |          |          |          |          |         |          |          |          |
| P15259 PGAM2_HUMAN     |          |          |          |          |          |         |          |          |          |
| P18669 PGAM1_HUMAN     |          |          |          |          |          |         |          |          |          |
| P48594 SPB4_HUMAN      |          |          |          |          |          |         |          |          |          |
| P0DP24 CALM2_HUMAN     |          |          |          |          |          |         |          |          |          |
| P0DP23 CALM1_HUMAN     |          |          |          |          |          |         |          |          |          |
| P0DP25 CALM3_HUMAN     |          |          |          |          |          |         |          |          |          |

P05387|RLA2\_HUMAN  
P04080|CYTB\_HUMAN  
P22626|ROA2\_HUMAN  
O75223|GGCT\_HUMAN  
P37837|TALDO\_HUMAN  
P27482|CALL3\_HUMAN  
O00299|CLIC1\_HUMAN  
P08582|TRFM\_HUMAN  
Q9HC84|MUC5B\_HUMAN  
P0DME0|SETLP\_HUMAN  
Q01105|SET\_HUMAN  
P02511|CRYAB\_HUMAN  
P01008|ANT3\_HUMAN  
P08571|CD14\_HUMAN  
A0A075B6S9|KV137\_HUMAN  
P0DSN7|KVD37\_HUMAN  
P06454|PTMA\_HUMAN  
P08294|SODE\_HUMAN  
Q9HAV0|GBB4\_HUMAN  
P62873|GBB1\_HUMAN  
P62879|GBB2\_HUMAN  
P16520|GBB3\_HUMAN  
P25705|ATPA\_HUMAN  
P08670|VIME\_HUMAN  
P61158|ARP3\_HUMAN  
Q9H0U4|RAB1B\_HUMAN  
Q92928|RAB1C\_HUMAN  
P62820|RAB1A\_HUMAN  
Q92930|RAB8B\_HUMAN  
P61026|RAB10\_HUMAN  
P59190|RAB15\_HUMAN  
Q15286|RAB35\_HUMAN  
P51153|RAB13\_HUMAN



P61006|RAB8A\_HUMAN  
P61160|ARP2\_HUMAN  
P06576|ATPB\_HUMAN  
P60660|MYL6\_HUMAN  
P14649|MYL6B\_HUMAN  
P05386|RLA1\_HUMAN  
Q14764|MVP\_HUMAN  
Q14118|DAG1\_HUMAN  
P04217|A1BG\_HUMAN  
P36952|SPB5\_HUMAN  
Q02809|PLOD1\_HUMAN  
Q6ZVX7|FBX50\_HUMAN  
P14174|MIF\_HUMAN  
Q58FF3|ENPLL\_HUMAN  
P14625|ENPL\_HUMAN  
P25786|PSA1\_HUMAN  
O95436|NPT2B\_HUMAN  
P13489|RINI\_HUMAN  
Q9UL46|PSME2\_HUMAN  
P36955|PEDF\_HUMAN  
P60981|DEST\_HUMAN  
P62913|RL11\_HUMAN  
O75888|TNF13\_HUMAN  
P57723|PCBP4\_HUMAN  
Q15365|PCBP1\_HUMAN  
P57721|PCBP3\_HUMAN  
Q15366|PCBP2\_HUMAN  
P15309|PPAP\_HUMAN  
P62491|RB11A\_HUMAN  
Q15907|RB11B\_HUMAN  
Q13867|BLMH\_HUMAN  
P33241|LSP1\_HUMAN  
P27635|RL10\_HUMAN

O75083|WDR1\_HUMAN  
 P09467|F16P1\_HUMAN  
 P02452|CO1A1\_HUMAN  
 P18124|RL7\_HUMAN  
 P62899|RL31\_HUMAN  
 P25789|PSA4\_HUMAN  
 Q9UN76|S6A14\_HUMAN  
 P06748|NPM\_HUMAN  
 O43516|WIPF1\_HUMAN  
 Q99497|PARK7\_HUMAN  
 Q86X10|RLGPB\_HUMAN  
 P40939|ECHA\_HUMAN  
 P09668|CATH\_HUMAN  
 O14497|ARI1A\_HUMAN  
 Q13200|PSMD2\_HUMAN  
 Q96SC8|DMTA2\_HUMAN  
 Q14574|DSC3\_HUMAN  
 Q9UPN9|TRI33\_HUMAN  
 P08174|DAF\_HUMAN  
 P06727|APOA4\_HUMAN  
 Q5T1R4|ZEP3\_HUMAN  
 Q96JM2|ZN462\_HUMAN  
 Q96RY5|CRML\_HUMAN  
 P04179|SODM\_HUMAN

**Subject 3**

| MASTER            | 357              | 351             | 358              | 356             | 0                 | 357             | 355              | 351              | 358              |
|-------------------|------------------|-----------------|------------------|-----------------|-------------------|-----------------|------------------|------------------|------------------|
| Accession         | Balafilco<br>n A | Comfilco<br>n A | Delefilco<br>n A | Etafilco<br>n A | Lotrafilco<br>n B | Nelfilco<br>n A | Nesofilco<br>n A | Senofilco<br>n A | Verofilco<br>n A |
| P02788 TRFL_HUMAN | 4.800005         | 6.156228        | 6.312946         | 6.76210<br>3    |                   | 5.05487<br>5    | 6.492151         | 6.194909         | 7.773583         |
| P35527 K1C9_HUMAN | 2.585276         | 2.514096        | 2.568126         | 2.10582<br>7    |                   | 2.42870<br>1    | 2.090198         | 2.461693         | 2.039006         |

|                    |          |          |          |                     |         |          |          |          |
|--------------------|----------|----------|----------|---------------------|---------|----------|----------|----------|
| P04264 K2C1_HUMAN  | 4.110809 | 3.839497 | 4.121533 | 3.48494<br>3        | 3.78259 | 3.289165 | 3.924756 | 3.507104 |
| P13645 K1C10_HUMAN | 2.942014 | 2.458142 | 3.021598 | 2.47433<br>2        | 2.29516 | 1.98468  | 2.608324 | 2.559571 |
| P35908 K22E_HUMAN  | 2.833021 | 2.202806 | 2.508756 | 2.10285<br>2        | 1.96537 | 1.743535 | 2.49954  | 2.329474 |
| P61626 LYSC_HUMAN  | 5.512686 | 6.124158 | 7.422039 | 7.76450<br>3        | 5.62990 | 8.30401  | 5.889723 | 7.113527 |
| P02768 ALBU_HUMAN  | 3.98486  | 3.231274 | 5.71633  | 6.01296<br>8        | 5.12358 | 6.050282 | 4.854313 | 4.862141 |
| P31025 LCN1_HUMAN  | 4.275856 | 5.585627 | 5.283541 | 6.39820<br>7        | 4.79355 | 6.010642 | 5.700904 | 5.268306 |
| P01833 PIGR_HUMAN  | 0.126032 | 3.556766 | 0.737658 | 2.41754<br>7        | 0.68169 | 2.438787 | 2.387517 | 1.728485 |
| P01876 IGHA1_HUMAN | 0.281815 | 3.973085 | 0.506806 | 2.66401<br>2.87371  | 0.87604 | 2.637669 | 2.60462  | 2.013204 |
| P01024 CO3_HUMAN   | 0.108485 | 2.513872 | 1.043191 | 2.97982<br>8        | 1.36155 | 2.809156 | 1.959542 | 1.535403 |
| P25311 ZA2G_HUMAN  | 1.216807 | 2.880192 | 2.267228 | 2.97982<br>4        | 1.66601 | 2.599341 | 2.700533 | 2.296197 |
| P04259 K2C6B_HUMAN | -8.22675 | -8.3962  | -6.81063 | -8.19433<br>1.45500 | -       | 7.65801  | -7.1529  | -7.75243 |
| P19013 K2C4_HUMAN  | 1.683415 | -0.12448 | 0.874693 | 0.98537<br>2        | 0.60689 | 1.547567 | -0.65232 | 3.075705 |
| P13647 K2C5_HUMAN  | 2.013755 | 0.433737 | 1.187466 | 0.98537<br>5        | 0.80656 | 0.941813 | 0.424825 | 2.895792 |
| P02538 K2C6A_HUMAN | -3.64411 | -3.18673 | -1.61936 | -3.13734            | -       | 3.07505  | -2.40938 | -3.32524 |
| P08727 K1C19_HUMAN | 0.435295 | -1.44803 | -0.37635 | -0.04139<br>0.05130 | -       | 0.80245  | 0.470194 | -1.48637 |
| P13646 K1C13_HUMAN | 0.70238  | -1.05085 | -0.4643  | 0.05130<br>3        | -       | 0.65171  | 0.000261 | -1.56818 |
| P08779 K1C16_HUMAN | -1.0044  | -0.78656 | 0.540628 | -0.73975            | -       | 0.63557  | -0.50417 | -0.77215 |
| P02533 K1C14_HUMAN | -1.69876 | -1.69586 | -1.08302 | -1.58344            | -       | 1.71803  | -1.45996 | -1.66108 |
| Q9UGM3 DMBT1_HUMAN | -2.02621 | -0.08508 | -1.8093  | -0.01587            | -       | 2.09728  | -0.05817 | -1.31912 |

|                    |          |          |          |                         |              |          |          |          |
|--------------------|----------|----------|----------|-------------------------|--------------|----------|----------|----------|
| P02787 TRFE_HUMAN  | 0.245195 | 0.082233 | 1.862285 | 2.11620<br>9<br>1.95746 | 1.31296<br>2 | 2.109926 | 1.19545  | 1.075453 |
| P0DOX7 IGK_HUMAN   | -0.33394 | 2.930351 | 0.558056 | 4                       | 0.41909      | 2.061526 | 1.781693 | 1.379221 |
| P98160 PGBM_HUMAN  | -2.27802 | -0.93946 | -1.83581 | -0.243<br>0.01583       | 1.69786      | -0.77208 | -1.37097 | -0.91035 |
| P60709 ACTB_HUMAN  | -1.91896 | -1.84126 | -0.92135 | 6<br>0.01583            | 0.80296      | -0.00596 | -0.6236  | -0.11577 |
| P63261 ACTG_HUMAN  | -1.91896 | -1.84126 | -0.92135 | 6                       | 0.80296      | -0.00596 | -0.6236  | -0.11577 |
| P15924 DESP_HUMAN  | -0.79824 | -0.76968 | -0.48152 | -0.98317<br>1.83881     | 0.72852      | -1.1641  | -0.90445 | -0.83223 |
| P06733 ENOA_HUMAN  | 0.08953  | 0.538745 | 1.323305 | 4                       | 7            | 2.357201 | 2.343917 | 2.00138  |
| P01036 CYTS_HUMAN  | -1.74548 | -0.31802 | -0.96203 | -0.26634<br>3.83962     | 1.91204      | 0.555054 | -0.94645 | -0.96664 |
| P12273 PIP_HUMAN   | 1.618114 | 3.302933 | 2.976601 | 9                       | 2            | 3.247345 | 3.294509 | 3.108825 |
| Q13421 MSLN_HUMAN  | -3.57716 | -2.04043 | -3.30616 | -1.66607                | 3.25354      | -2.31643 | -2.22784 | -2.24695 |
| P01037 CYTN_HUMAN  | -4.16712 | -2.2272  | -2.7988  | -2.45559                | 3.84077      | -0.72975 | -2.86978 | -2.95871 |
| P0DOX2 IGA2_HUMAN  | -3.77751 | -0.33277 | -3.33999 | -1.6018<br>0.57946      | -3.199       | -1.58365 | -1.50945 | -2.17961 |
| P07355 ANXA2_HUMAN | 0.002726 | -0.84222 | 0.565851 | 9                       | 1            | 0.810806 | -0.34688 | 1.400492 |
| P00450 CERU_HUMAN  | -2.13379 | -0.66917 | -1.40026 | -0.32187<br>1.24226     | 1.73112      | -0.36416 | -0.93778 | -0.64606 |
| P06396 GELS_HUMAN  | -1.06588 | 0.268628 | -0.27527 | 3                       | 3            | 1.102327 | 0.367966 | 0.506509 |
| P00738 HPT_HUMAN   | -2.72398 | -1.6496  | -1.29816 | -0.61838                | 1.84416      | -0.86265 | -1.59402 | -1.30005 |
| P0DOY2 IGLC2_HUMAN | -3.12798 | 0.533905 | -2.62949 | -0.80564                | 2.45705      | -0.608   | -0.94015 | -1.38097 |
| B9A064 IGLL5_HUMAN | -2.92144 | 0.445099 | -2.36375 | -0.77881                | 2.35208      | -0.60048 | -0.88832 | -1.29838 |
| P0DOX8 IGL1_HUMAN  | -2.92144 | 0.445099 | -2.36375 | -0.77881                | 2.35208      | -0.60048 | -0.88832 | -1.29838 |

|                    |          |          |          |          |         |          |          |          |  |
|--------------------|----------|----------|----------|----------|---------|----------|----------|----------|--|
|                    |          |          |          | 0.37279  | -       |          |          |          |  |
| P0DOX5 IGG1_HUMAN  | -1.72274 | -1.46849 | -0.08258 | 3        | 1.08212 | 0.650402 | -1.12985 | -0.11957 |  |
|                    |          |          |          | 0.05195  | -       |          |          |          |  |
| P10909 CLUS_HUMAN  | -2.29213 | -0.59376 | -2.01416 | 9        | 1.44239 | -0.52975 | -0.94438 | -1.14061 |  |
|                    |          |          |          |          | -       |          |          |          |  |
| P08729 K2C7_HUMAN  | -1.75636 | -3.39507 | -2.32002 | -1.58932 | 2.69065 | -1.02507 | -3.47016 | -0.10724 |  |
|                    |          |          |          |          | -       |          |          |          |  |
| P04083 ANXA1_HUMAN | -1.57385 | -2.3486  | -1.51046 | -0.54039 | 1.35263 | -0.51565 | -1.67401 | 0.117453 |  |
|                    |          |          |          |          | -       |          |          |          |  |
| P60174 TPIS_HUMAN  | -2.19305 | -1.39495 | -0.84963 | -0.31029 | 0.73395 | -0.04282 | 0.128662 | -0.3042  |  |
|                    |          |          |          |          | -       |          |          |          |  |
| P14923 PLAK_HUMAN  | -0.45149 | -0.55999 | 0.020167 | -0.51363 | 0.49887 | -0.60469 | -0.39638 | -0.33152 |  |
|                    |          |          |          |          | -       |          |          |          |  |
| P00352 AL1A1_HUMAN | -2.32033 | -2.12452 | -1.43258 | -0.10534 | 0.77245 | 0.272302 | -0.76489 | -0.49835 |  |
|                    |          |          |          |          | -       |          |          |          |  |
| P01871 IGHM_HUMAN  | -8.26829 | -5.22076 | -6.44858 | -5.6998  | 7.02985 | -5.64533 | -6.35413 | -5.95476 |  |
|                    |          |          |          | 0.08387  |         |          |          |          |  |
| P14618 KPYM_HUMAN  | -1.64349 | -1.33013 | -1.1277  | 3        | -0.7384 | 0.150999 | -0.59619 | 0.060216 |  |
|                    |          |          |          |          | -       |          |          |          |  |
| P05787 K2C8_HUMAN  | -2.22727 | -3.66557 | -2.92753 | -1.92047 | 2.90161 | -1.49405 | -3.94786 | -0.62872 |  |
|                    |          |          |          | 0.53802  |         |          |          |          |  |
| O75556 SG2A1_HUMAN | -0.60184 | -0.56837 | -1.46868 | 8        | 0.93532 | 0.925312 | 0.200054 | 0.206935 |  |
|                    |          |          |          | 0.17127  |         |          |          |          |  |
| P30838 AL3A1_HUMAN | -1.56752 | -1.34925 | -1.23262 | 8        | 0.21546 | 0.274414 | -0.16917 | 0.194401 |  |
|                    |          |          |          |          | -       |          |          |          |  |
| P0DMV8 HS71A_HUMAN | -3.48455 | -3.87117 | -2.54792 | -1.71349 | 2.43537 | -1.68705 | -2.87444 | -1.86379 |  |
|                    |          |          |          |          | -       |          |          |          |  |
| P0DMV9 HS71B_HUMAN | -3.48455 | -3.87117 | -2.54792 | -1.71349 | 2.43537 | -1.68705 | -2.87444 | -1.86379 |  |
|                    |          |          |          |          | -       |          |          |          |  |
| Q08380 LG3BP_HUMAN | -2.1923  | -0.99878 | -1.65512 | -0.16481 | 1.61543 | -0.43542 | -1.11768 | -1.03584 |  |
|                    |          |          |          | 2.75662  | 1.27436 |          |          |          |  |
| Q16378 PROL4_HUMAN | 1.498458 | 1.793953 | 1.743367 | 4        | 7       | 3.178135 | 1.400755 | 1.834332 |  |
|                    |          |          |          |          | -       |          |          |          |  |
| Q04695 K1C17_HUMAN | -4.46327 | -3.97887 | -2.78052 | -3.89078 | 3.68305 | -3.93596 | -4.15726 | -3.5928  |  |
|                    |          |          |          |          | -       |          |          |          |  |
| P68133 ACTS_HUMAN  | -5.40626 | -5.02725 | -4.35827 | -3.3088  | 3.81364 | -3.31494 | -4.00443 | -3.58662 |  |
|                    |          |          |          |          | -       |          |          |          |  |
| P68032 ACTC_HUMAN  | -5.40626 | -5.02725 | -4.35827 | -3.3088  | 3.81364 | -3.31494 | -4.00443 | -3.58662 |  |

|                    |          |          |          |                     |                    |          |          |          |
|--------------------|----------|----------|----------|---------------------|--------------------|----------|----------|----------|
| P04792 HSPB1_HUMAN | -0.76949 | -1.09173 | -0.40613 | 1.04897<br>2        | 0.42609<br>2       | 0.959667 | 0.123092 | 0.694445 |
| P01009 A1AT_HUMAN  | -0.45985 | -1.18869 | 0.970926 | 1.43783<br>1        | 0.44430<br>3       | 1.427596 | 0.072118 | 0.340497 |
| P12035 K2C3_HUMAN  | -8.33374 |          | -4.91505 | -5.66858<br>2.36702 | 7.62766<br>1.58373 | -5.66281 | -6.59801 | -5.38895 |
| P06702 S10A9_HUMAN | 0.441999 | 1.126935 | 1.82549  | 9                   | 3                  | 2.991694 | 2.539499 | 2.53644  |
| P22079 PERL_HUMAN  | -3.33572 | -2.48655 | -2.3749  | -1.37753            | 2.86083            | -1.84606 | -2.63781 | -2.10372 |
| P01859 IGHG2_HUMAN | -3.969   | -3.85244 | -2.37511 | -1.84675<br>0.03862 | -2.4702<br>-       | -1.68359 | -2.79698 | -2.81146 |
| P20061 TCO1_HUMAN  | -2.34998 | -0.36295 | -1.29865 | 1                   | 1.50243            | -0.52929 | -0.93242 | -0.82178 |
| Q02413 DSG1_HUMAN  | -2.3411  | -1.98109 | -1.63676 | -1.94851            | 1.99909            | -2.36637 | -1.98932 | -1.52168 |
| P19012 K1C15_HUMAN | -7.46788 |          | -10.3988 | -9.3348             | 9.21385            | -8.48691 | -8.33269 | -6.62935 |
| P30740 ILEU_HUMAN  | -2.5447  | -1.26568 | -1.40355 | -0.334<br>0.60012   | 1.11503<br>-       | -0.02934 | -0.14443 | -0.79959 |
| P80188 NGAL_HUMAN  | -2.86867 | 0.275363 | -1.25187 | 5<br>0.29005        | 0.98394<br>-       | 0.419177 | 0.23064  | -0.96603 |
| Q99935 PROL1_HUMAN | -0.79945 | -0.38204 | -1.08605 | 9                   | 0.85082            | -0.18894 | -0.86383 | -0.17322 |
| P04406 G3P_HUMAN   | -2.86542 | -1.99792 | -1.50665 | -0.86165<br>1.68863 | 1.44741<br>-       | -1.12708 | -1.3502  | -0.62804 |
| P03973 SLPI_HUMAN  | -1.03242 | 0.36979  | 1.053617 | 1                   | 1.04186            | 1.404423 | -0.39002 | -0.4571  |
| P98088 MUC5A_HUMAN | -3.45543 | -1.48307 | -2.2069  | -2.12988            | 2.34061            | -0.74789 | -2.29672 | 0.18286  |
| P14555 PA2GA_HUMAN | -1.79717 | -0.70874 | -3.28196 | -1.33713<br>2.49906 | -3.8017<br>0.60117 | -1.87269 | -1.54416 | -1.55995 |
| P01591 IGJ_HUMAN   | 0.227894 | 3.976488 | 0.123046 | 1<br>1.64202        | 7                  | 2.646839 | 2.539309 | 1.912824 |
| O95968 SG1D1_HUMAN | 0.026188 | 1.116905 | -0.31522 | 5                   | 0.36444            | 1.582755 | 1.289144 | 1.313007 |
| Q7Z794 K2C1B_HUMAN | -1.07974 | -1.26019 | -0.78371 | -1.20549            | 1.26734            | -1.5858  | -1.26088 | -1.09147 |
| Q8N1N4 K2C78_HUMAN | -3.30894 | -3.43208 | -3.26133 | -3.18424            | 3.40036            | -3.58032 | -3.41819 | -2.90022 |

|                    |          |          |          |                     |   |                   |          |          |          |
|--------------------|----------|----------|----------|---------------------|---|-------------------|----------|----------|----------|
| P63104 1433Z_HUMAN | -2.94595 | -2.88146 | -2.07206 | -0.63136            | - | 1.38247           | -0.47438 | -1.79249 | -1.1654  |
| P31944 CASPE_HUMAN | -2.26184 | -1.81128 | -0.84306 | -1.6081             | - | 2.09195           | -1.92294 | -1.65465 | 0.290627 |
| Q96P63 SPB12_HUMAN | -4.15452 | -4.01481 | -3.51798 | -3.95036            | - | 4.19614           | -4.18356 | -4.27624 | -3.27305 |
| P09228 CYTT_HUMAN  | -7.69634 | -6.35281 | -6.79754 | -5.67493            | - | 7.07024           | -6.53447 | -6.35949 | -6.41746 |
| P09211 GSTP1_HUMAN | -2.83076 | -2.02972 | -1.58343 | -0.86843            | - | 1.32347           | -0.91717 | -0.7435  | -0.85901 |
| Q9GZZ8 LACRT_HUMAN | 1.798373 | 2.650169 | 1.604141 | 3.41863<br>8        | - | 1.95555<br>4      | 2.409913 | 2.887773 | 2.505009 |
| P02647 APOA1_HUMAN | -1.54669 | -1.97603 | -1.25432 | -0.24187<br>0.48533 | - | 0.78768           | -0.84749 | -1.5981  | -0.3936  |
| Q96DA0 ZG16B_HUMAN | -1.25944 | -0.83399 | 0.470602 | 1.09578<br>3        | - | -1.309<br>0.66642 | 0.35523  | -0.74392 | -0.04273 |
| P05109 S10A8_HUMAN | -0.43319 | -0.44287 | 0.57618  | 6                   | - | 5                 | 1.759707 | 1.264626 | 1.228104 |
| P07602 SAP_HUMAN   | -3.44603 | -2.93885 | -2.9812  | -1.4636             | - | 2.68084           | -2.06062 | -2.93318 | -2.39639 |
| P05090 APOD_HUMAN  | -4.50764 | -2.35067 | -3.03415 | -2.34237            | - | 3.04874           | -2.10876 | -3.02142 | -0.44136 |
| P11142 HSP7C_HUMAN | -4.16793 | -3.69981 | -2.83496 | -2.08392            | - | -2.8827           | -2.15306 | -3.07402 | -2.05312 |
| Q5D862 FILA2_HUMAN | -3.58874 | -3.46236 | -2.72435 | -3.73837            | - | -3.8799           | -3.61122 | -3.51791 | -1.75439 |
| P61769 B2MG_HUMAN  | -2.70339 | -1.8904  | -2.07384 | -1.09318            | - | 1.77877           | 1.738462 | -1.21642 | -1.91023 |
| Q01469 FABP5_HUMAN | -2.71656 | -2.36361 | -1.11938 | -1.13859            | - | 1.11296           | -0.5611  | -1.31748 | -0.58908 |
| P34096 RNAS4_HUMAN | -3.82823 | -1.41833 | -2.29625 | -1.14688            | - | 2.95063           | -1.13205 | -1.76382 | -2.48256 |
| P07339 CATD_HUMAN  | -3.21181 | -2.84571 | -2.34288 | -1.78831            | - | 2.26459           | -1.88605 | -3.00965 | -1.5778  |
| P30044 PRDX5_HUMAN | -3.02418 | -1.12695 | -2.62028 | -1.23656            | - | 2.19584           | -0.83794 | -1.82936 | -1.16428 |
| P04075 ALDOA_HUMAN | -3.16701 | -2.84796 | -1.78494 | -1.32098            | - | 1.92663           | -1.20013 | -1.86358 | -1.41237 |
| P31947 1433S_HUMAN | -5.05647 | -4.96343 | -4.2936  | -3.06293            | - | 3.64184           | -3.03629 | -3.84613 | -3.47467 |

|                    |          |          |          |          |         |         |          |          |          |
|--------------------|----------|----------|----------|----------|---------|---------|----------|----------|----------|
| Q5VTE0 EF1A3_HUMAN | -1.90147 | -2.06582 | -1.02843 | -0.30665 | -       | 1.18452 | -0.38071 | -1.08954 | 0.192648 |
| P68104 EF1A1_HUMAN | -1.90147 | -2.06582 | -1.02843 | -0.30665 | -       | 1.18452 | -0.38071 | -1.08954 | 0.192648 |
| P62937 PPIA_HUMAN  | -3.11208 | -2.30935 | -2.01852 | -1.22713 | -       | 1.52852 | 0.515831 | -0.64778 | -1.26215 |
| P62805 H4_HUMAN    | -1.26947 | -2.82535 | -1.38895 | -1.26465 | -       | -2.1565 | -0.8211  | -2.73209 | 0.470982 |
| P07737 PROF1_HUMAN | -3.62909 | -2.97713 | -1.96837 | -1.35127 | -       | 1.63042 | 0.439883 | -1.29598 | -1.32839 |
| A0M8Q6 IGLC7_HUMAN | -8.18744 | -4.86342 | -8.08227 | -5.62597 | -       | 7.47462 | -5.38989 | -6.16445 | -6.46658 |
| Q99456 K1C12_HUMAN | -8.17792 | -8.82345 | -5.57474 | -6.14322 | 0.18401 | 8.11091 | -6.17323 | -7.55336 | -5.8101  |
| Q06830 PRDX1_HUMAN | -1.41501 | -1.71836 | -0.90889 | 9        | -       | 0.52242 | 0.549613 | -0.55612 | 0.00224  |
| P30086 PEBP1_HUMAN | -3.10794 | -1.65849 | -1.46659 | -1.3576  | -       | 1.65306 | -0.38782 | -0.28521 | -1.20941 |
| Q3SY84 K2C71_HUMAN |          |          |          |          | -       |         |          |          |          |
| P02545 LMNA_HUMAN  | -1.88812 | -3.06642 | -1.81892 | -1.88985 | -       | 2.60975 | -1.575   | -3.59595 | -0.4652  |
| P00338 LDHA_HUMAN  | -2.19252 | -1.04656 | -0.84821 | -0.38234 | -       | 0.95795 | 0.08776  | -0.38459 | -0.61859 |
| P01034 CYTC_HUMAN  | -3.67797 | -1.93569 | -2.80487 | -1.37535 | -       | 2.80808 | 0.03116  | -1.91732 | -2.35578 |
| P68363 TBA1B_HUMAN | -4.22756 | -3.5156  | -2.75342 | -2.30444 | -       | 3.32155 | -2.43699 | -3.15687 | -1.9175  |
| P52209 6PGD_HUMAN  | -4.09393 | -3.86439 | -3.26721 | -1.93297 | -       | 2.74265 | -1.96664 | -2.88657 | -2.33316 |
| Q8N474 SFRP1_HUMAN | -4.09981 | -3.54076 | -2.78809 | -2.52165 | -       | 4.07434 | -3.07158 | -3.58027 | -0.72192 |
| P01011 AACT_HUMAN  | -2.09367 | -1.60634 | -1.40629 | -0.93501 | 0.37254 | 1.91577 | -1.03894 | -1.544   | -1.43453 |
| P17931 LEG3_HUMAN  | -1.7651  | -1.53497 | -1.11864 | 3        | -       | 0.25673 | 1.279666 | -0.56249 | -0.38335 |
| P01619 KV320_HUMAN | -4.67457 | -1.71765 | -3.43087 | -2.50979 | -       | 3.84732 | -2.41565 | -2.57792 | -3.32771 |
| P11021 BIP_HUMAN   | -3.39826 | -3.01078 | -2.49442 | -1.81592 | -       | 2.79559 | -1.88318 | -3.15121 | -1.90896 |



|                        |          |          |          |          |         |          |          |          |
|------------------------|----------|----------|----------|----------|---------|----------|----------|----------|
| P00558 PGK1_HUMAN      | -1.91905 | -1.87768 | -1.39843 | -0.49646 | -1.5736 | 0.148319 | -1.13226 | -0.7272  |
| P07858 CATB_HUMAN      | -4.47751 | -3.35423 | -3.31243 | -2.53397 | 3.75725 | -2.85849 | -3.39839 | -3.11983 |
| P29401 TKT_HUMAN       | -3.34967 | -2.8289  | -2.04523 | -1.46964 | 1.78564 | -1.32575 | -2.05068 | -1.78717 |
| P80303 NUCB2_HUMAN     | -2.88126 | -2.40132 | -2.72093 | -1.11437 | 2.76437 | -1.82421 | -2.57679 | -2.21287 |
| P15311 EZRI_HUMAN      | -4.19339 | -3.18595 | -3.49244 | -2.2152  | 2.95296 | -2.18717 | -2.91357 | -2.62238 |
| Q08554 DSC1_HUMAN      | -2.19157 | -2.11736 | -1.98411 | -2.26189 | 2.19194 | -2.38469 | -2.02907 | -2.01663 |
| Q93079 H2B1H_HUMAN     | -2.0224  | -3.61535 | -2.71799 | -2.29273 | 3.29325 | -1.74511 | -3.76608 | -0.38091 |
| Q5QNW6 H2B2F_HUMAN     | -2.0224  | -3.61535 | -2.71799 | -2.29273 | 3.29325 | -1.74511 | -3.76608 | -0.38091 |
| Q99877 H2B1N_HUMAN     | -2.0224  | -3.61535 | -2.71799 | -2.29273 | 3.29325 | -1.74511 | -3.76608 | -0.38091 |
| O60814 H2B1K_HUMAN     | -2.0224  | -3.61535 | -2.71799 | -2.29273 | 3.29325 | -1.74511 | -3.76608 | -0.38091 |
| P62807 H2B1C_HUMAN     | -2.0224  | -3.61535 | -2.71799 | -2.29273 | 3.29325 | -1.74511 | -3.76608 | -0.38091 |
| P58876 H2B1D_HUMAN     | -2.0224  | -3.61535 | -2.71799 | -2.29273 | 3.29325 | -1.74511 | -3.76608 | -0.38091 |
| Q99880 H2B1L_HUMAN     | -2.0224  | -3.61535 | -2.71799 | -2.29273 | 3.29325 | -1.74511 | -3.76608 | -0.38091 |
| P57053 H2BFS_HUMAN     | -2.0224  | -3.61535 | -2.71799 | -2.29273 | 3.29325 | -1.74511 | -3.76608 | -0.38091 |
| Q99879 H2B1M_HUMAN     | -2.0224  | -3.61535 | -2.71799 | -2.29273 | 3.29325 | -1.74511 | -3.76608 | -0.38091 |
| P27797 CALR_HUMAN      | -3.62191 | -3.50699 | -2.61983 | -1.54849 | 2.65958 | -1.3284  | -2.92065 | -2.26346 |
| Q6UXB2 CXL17_HUMAN     | -3.99912 | -3.15207 | -2.46356 | -2.45053 | 4.21932 | -3.04976 | -3.61376 | -2.80068 |
| A0A0B4J1X5 HV374_HUMAN | -6.4682  | -3.36926 | -4.78129 | -4.26085 | 5.58404 | -3.9721  | -4.29162 | -4.87556 |
| P06744 G6PI_HUMAN      | -4.61077 | -3.73193 | -3.33329 | -2.97017 | 3.38112 | -2.64246 | -2.58434 | -2.8935  |
| P05783 K1C18_HUMAN     | -6.10729 | -6.91188 | -4.80289 | -5.12757 | -6.4657 | -4.99982 | -6.79535 | -4.36536 |

|                        |          |          |          |          |         |          |          |          |
|------------------------|----------|----------|----------|----------|---------|----------|----------|----------|
| P01040 CYTA_HUMAN      | -3.13869 | -2.46547 | -1.42621 | -2.36772 | 2.08758 | -1.59048 | -1.68803 | -1.44009 |
| P40394 ADH7_HUMAN      | -2.53456 | -2.61464 | -1.82372 | -1.3173  | 1.67387 | -0.66781 | -1.2924  | -1.41783 |
| A0A0B4J1V0 HV315_HUMAN | -7.77395 | -5.23294 | -6.64927 | -5.17148 | 6.56704 | -6.42499 | -6.27191 | -5.73496 |
| P80748 LV321_HUMAN     | -11.0074 | -8.11264 | -10.0993 | -8.47088 | 10.3204 | -8.81531 |          | -8.90665 |
| P62979 RS27A_HUMAN     | -2.83742 | -2.6411  | -1.72775 | -1.86823 | 2.56011 | -1.60127 | -2.26068 | -1.49819 |
| P62987 RL40_HUMAN      | -2.83742 | -2.6411  | -1.72775 | -1.86823 | 2.56011 | -1.60127 | -2.26068 | -1.49819 |
| P0CG47 UBB_HUMAN       | -2.83742 | -2.6411  | -1.72775 | -1.86823 | 2.56011 | -1.60127 | -2.26068 | -1.49819 |
| P0CG48 UBC_HUMAN       | -2.83742 | -2.6411  | -1.72775 | -1.86823 | 2.56011 | -1.60127 | -2.26068 | -1.49819 |
| P16403 H12_HUMAN       | -5.25994 | -6.46641 | -6.18837 | -5.03431 | 5.91184 | -4.59746 | -6.75852 | -3.64387 |
| P27348 I433T_HUMAN     | -5.65074 | -4.67703 | -4.56887 | -4.03502 | 4.94904 | -3.74478 | -4.73286 | -4.38695 |
| P07237 PDIA1_HUMAN     | -5.24732 | -5.26369 | -4.42129 | -3.41253 | -4.5232 | -3.22759 | -4.95398 | -4.18481 |
| P00751 CFAB_HUMAN      | -4.11775 | -1.78952 | -2.82824 | -1.1933  | -2.5439 | -1.24836 | -1.67269 | -2.65231 |
| P06312 KV401_HUMAN     | -6.05144 | -3.62435 | -5.12825 | -3.84807 | 5.07528 | -3.84332 | -4.19889 | -4.45717 |
| P02765 FETUA_HUMAN     | -4.17819 | -4.8068  | -2.81337 | -1.685   | 2.77712 | -2.15058 | -4.15933 | -3.07417 |
| P10412 H14_HUMAN       | -5.66139 | -7.88212 | -7.03223 | -5.92495 | 6.86172 | -5.43086 | -8.24863 | -4.26334 |
| P31941 ABC3A_HUMAN     | -4.8811  | -3.71452 | -4.14859 | -2.08247 | 3.17633 | -0.66959 | -2.89778 | -3.13027 |
| P55058 PLTP_HUMAN      | -4.88002 | -4.36095 | -3.71751 | -3.28771 | 5.08861 | -3.54861 | -4.46156 | -3.8141  |
| P01615 KVD28_HUMAN     | -8.492   | -5.16733 | -7.51784 | -6.10082 | 7.68864 | -5.74515 | -6.19798 | -6.64324 |
| A0A075B6P5 KV228_HUMAN | -8.492   | -5.16733 | -7.51784 | -6.10082 | 7.68864 | -5.74515 | -6.19798 | -6.64324 |
| P81605 DCD_HUMAN       | -2.11713 | -1.74379 | -2.1919  | -2.43819 | 2.26757 | -1.03575 | -2.32538 | -2.43797 |

|                        |          |          |          |          |         |          |          |          |
|------------------------|----------|----------|----------|----------|---------|----------|----------|----------|
| P02774 VTDB_HUMAN      | -4.03001 | -3.73221 | -2.57825 | -2.02566 | 2.83799 | -2.16276 | -3.33107 | -3.06393 |
| P14550 AK1A1_HUMAN     | -5.06111 | -4.53755 | -4.15681 | -3.11879 | 4.03823 | -2.79969 | -3.19171 | -3.30804 |
| A0A0B4J1Y9 HV372_HUMAN |          |          |          |          |         |          |          |          |
| P32119 PRDX2_HUMAN     | -3.46924 | -3.6043  | -3.19375 | -2.62274 | -2.9414 | -2.50002 | -2.96331 | -2.57306 |
| P26447 S10A4_HUMAN     | -2.18036 | -3.00308 | -2.14699 | -0.75659 | 1.45686 | -0.46799 | -1.54963 | -0.45839 |
| P31151 S10A7_HUMAN     | -4.41322 | -2.80393 | -2.43222 | -2.69408 | 3.39682 | -2.48856 | -2.38118 | -1.46128 |
| Q15517 CDSN_HUMAN      | -5.63585 | -5.08716 | -5.46681 | -5.54784 | 5.74312 | -5.13516 | -5.09417 | -5.50839 |
| P20930 FILA_HUMAN      | -2.07227 | -1.87375 | -1.38144 | -1.91527 | 1.96286 | -2.06178 | -1.67462 | -1.03199 |
| P0DP08 HVD82_HUMAN     | -5.56828 | -1.67425 | -4.15109 | -2.65481 | 4.31727 | -2.51385 | -2.89813 | -2.55396 |
| P01825 HV459_HUMAN     | -5.56828 | -1.67425 | -4.15109 | -2.65481 | 4.31727 | -2.51385 | -2.89813 | -2.55396 |
| P0DP07 HV431_HUMAN     | -5.56828 | -1.67425 | -4.15109 | -2.65481 | 4.31727 | -2.51385 | -2.89813 | -2.55396 |
| A0A0C4DH41 HV461_HUMAN |          |          |          |          |         |          |          |          |
| N                      | -5.56828 | -1.67425 | -4.15109 | -2.65481 | 4.31727 | -2.51385 | -2.89813 | -2.55396 |
| P0DP06 HVD34_HUMAN     | -5.56828 | -1.67425 | -4.15109 | -2.65481 | 4.31727 | -2.51385 | -2.89813 | -2.55396 |
| P06331 HV434_HUMAN     | -5.56828 | -1.67425 | -4.15109 | -2.65481 | 4.31727 | -2.51385 | -2.89813 | -2.55396 |
| P01824 HV439_HUMAN     | -5.56828 | -1.67425 | -4.15109 | -2.65481 | 4.31727 | -2.51385 | -2.89813 | -2.55396 |
| A0A0A0MRZ8 KVD11_HUMAN |          |          |          |          |         |          |          |          |
| P04433 KV311_HUMAN     |          |          |          |          |         |          |          |          |
| P31949 S10AB_HUMAN     | -3.83581 | -5.5023  | -4.00393 | -3.11262 | 3.67731 | -2.58844 | -4.44253 | -2.22611 |
| P60953 CDC42_HUMAN     | -5.14796 | -4.50172 | -4.25352 | -2.92828 | 4.16609 | -3.3848  | -4.10044 | -3.09495 |
| Q6KB66 K2C80_HUMAN     | -5.92816 | -6.16966 | -5.1843  | -5.63874 | 6.42275 | -5.31834 | -5.88164 | -5.25079 |
| P10599 THIO_HUMAN      | -3.72634 | -3.26574 | -2.5977  | -2.14613 | 2.23458 | -0.97606 | -2.89858 | -1.89604 |

|                        |          |          |          |          |         |          |          |          |
|------------------------|----------|----------|----------|----------|---------|----------|----------|----------|
| P40925 MDHC_HUMAN      | -4.23394 | -3.24348 | -3.00523 | -2.45994 | -2.8659 | -2.22547 | -2.24339 | -2.546   |
| Q14515 SPRL1_HUMAN     | -6.61093 | -5.06981 | -5.78886 | -4.8622  | 6.14279 | -5.20739 | -5.45081 | -5.45607 |
| A0A075B6S5 KV127_HUMAN |          |          |          |          |         |          |          |          |
| P01742 HV169_HUMAN     |          |          |          |          |         |          |          |          |
| A0A0C4DH31 HV118_HUMAN | -7.33929 | -3.89548 | -6.57316 | -4.99201 | 6.52022 | -4.89485 | -5.21514 | -5.43996 |
| P23083 HV102_HUMAN     | -7.33929 | -3.89548 | -6.57316 | -4.99201 | 6.52022 | -4.89485 | -5.21514 | -5.43996 |
| P07900 HS90A_HUMAN     | -5.49927 | -4.83017 | -4.56185 | -3.11964 | 4.09028 | -3.08936 | -4.48779 | -3.77174 |
| P84243 H33_HUMAN       | -3.79291 | -3.95292 | -4.24754 | -3.55746 | 4.60805 | -3.02034 | -4.48718 | -2.07183 |
| P01700 LV147_HUMAN     | -5.18602 | -2.68171 | -4.6803  | -3.17646 | 4.52158 | -3.63704 | -3.87821 | -3.65582 |
| P23528 COF1_HUMAN      | -5.44678 | -4.94776 | -4.66902 | -3.44698 | 4.23626 | -3.34505 | -4.15594 | -3.61557 |
| P21980 TGM2_HUMAN      | -3.78539 | -3.74154 | -3.56899 | -1.78775 | 2.82714 | -1.64078 | -2.80033 | -1.80542 |
| Q09666 AHNK_HUMAN      | -2.78606 | -4.17084 | -3.14561 | -2.11003 | 2.81685 | -2.07198 | -3.54861 | -1.7327  |
| P01624 KV315_HUMAN     | -7.08842 | -4.18548 | -6.44922 | -5.27457 | 6.59033 | -4.82201 | -5.17484 | -5.901   |
| P07384 CAN1_HUMAN      | -7.9708  | -8.16592 | -7.4165  | -6.34127 | 7.26664 | -6.46193 | -7.582   | -6.25071 |
| Q6UWP8 SBSN_HUMAN      | -8.64419 |          | -8.97286 | -10.0943 | 8.38343 | -8.76654 | -8.40506 | -8.55536 |
| Q8NBJ4 GOLM1_HUMAN     |          |          |          |          |         |          |          |          |
| P40926 MDHM_HUMAN      | -7.04291 | -8.22143 | -5.86882 | -5.1802  | 5.82289 | -4.77472 | -6.54722 | -5.40882 |
| P68371 TBB4B_HUMAN     | -6.29501 | -5.02515 | -5.2199  | -4.17276 | 4.80447 | -4.07775 | -4.72353 | -4.18458 |
| A0A0A0MS15 HV349_HUMAN | -8.82955 | -5.99066 | -7.21959 | -6.69647 | 8.19057 | -6.36145 | -6.50472 | -7.21776 |
| P01593 KVD33_HUMAN     | -7.35999 | -4.99686 | -6.90601 | -5.46348 | 7.42294 | -5.28172 | -5.78177 | -5.30423 |
| P01594 KV133_HUMAN     | -7.35999 | -4.99686 | -6.90601 | -5.46348 | 7.42294 | -5.28172 | -5.78177 | -5.30423 |

|                        |          |          |          |          |         |          |          |          |
|------------------------|----------|----------|----------|----------|---------|----------|----------|----------|
| P02766 TTHY_HUMAN      | -4.92283 | -5.24263 | -3.2856  | -3.06618 | 3.81618 | -3.01426 | -4.10511 | -3.77182 |
| Q08188 TGM3_HUMAN      | -7.15779 | -6.35648 | -6.81635 | -6.71375 | 6.74769 | -7.22981 | -6.64615 | -5.79761 |
| P05089 ARGI1_HUMAN     | -3.30578 | -3.27533 | -2.95379 | -3.29602 | 3.28015 | -2.91304 | -2.98681 | -2.543   |
| Q9UBT3 DKK4_HUMAN      |          |          |          |          |         |          |          |          |
| O00584 RNT2_HUMAN      |          |          |          |          |         |          |          |          |
| A0A0B4J2D9 KVD13_HUMAN |          |          |          |          |         |          |          |          |
| P0DP09 KV113_HUMAN     |          |          |          |          |         |          |          |          |
| O75874 IDHC_HUMAN      | -7.02702 | -6.79999 | -6.58247 | -5.33544 | -6.1165 | -4.91271 | -5.89462 | -5.58638 |
| P15814 IGLL1_HUMAN     | -3.97936 | -0.58667 | -3.70178 | -1.74979 | 3.29621 | -1.62735 | -1.90409 | -2.34393 |
| P30085 KCY_HUMAN       | -6.21785 | -5.23366 | -5.50265 | -4.2532  | 5.29509 | -4.13243 | -4.90602 | -4.68405 |
| A0A0C4DH34 HV428_HUMAN |          |          |          |          |         |          |          |          |
| P30101 PDIA3_HUMAN     | -7.56498 | -8.2625  | -7.046   | -5.62206 | -6.7035 | -5.4514  | -7.26834 | -6.13995 |
| Q14697 GANAB_HUMAN     | -5.09232 | -5.45751 | -6.66507 | -4.52209 | 5.79562 | -4.87669 | -6.67344 | -4.79228 |
| P12830 CADH1_HUMAN     | -6.27779 | -5.47739 | -5.46823 | -5.18626 | 7.69265 | -5.13621 | -6.74147 | -4.43099 |
| Q16651 PRSS8_HUMAN     |          |          |          |          |         |          |          |          |
| P13987 CD59_HUMAN      | -4.29618 | -3.40431 | -3.45375 | -1.81518 | 4.06478 | -2.00712 | -3.7248  | -2.76329 |
| O43653 PSCA_HUMAN      | -5.34399 | -2.89335 | -5.50472 | -2.54433 | 3.41847 | -2.89589 | -3.92449 | -3.88256 |
| P02763 A1AG1_HUMAN     | -6.06584 | -7.09967 | -4.33823 | -4.14898 | 4.79643 | -4.17774 | -5.25073 | -5.01036 |
| A0A0B4J1V6 HV373_HUMAN |          |          |          |          |         |          |          |          |
| O43852 CALU_HUMAN      | -6.07257 | -4.74598 | -5.11594 | -3.96688 | 5.13034 | -4.63891 | -5.32508 | -4.94063 |
| P08758 ANXA5_HUMAN     | -5.46976 | -5.2618  | -4.71191 | -4.3619  | 4.71419 | -4.21678 | -4.91272 | -4.08397 |
| Q5T749 KPRP_HUMAN      | -7.06845 | -6.8413  | -6.35243 | -6.33094 | 7.15004 | -6.08271 | -6.19063 | -6.19523 |
| Q7Z5P9 MUC19_HUMAN     | -8.16107 | -7.23729 | -6.50811 | -6.36403 | 8.23951 | -6.86123 | -6.82277 | -5.44727 |

|                        |          |          |          |          |  |         |          |          |          |
|------------------------|----------|----------|----------|----------|--|---------|----------|----------|----------|
| P01714 LV319_HUMAN     |          |          |          |          |  | -       |          |          |          |
| P01717 LV325_HUMAN     | -8.16025 | -5.04367 | -7.85282 | -6.26881 |  | 7.57526 | -6.17939 | -6.64872 | -6.88252 |
| A0A075B6K4 LV310_HUMAN |          |          |          |          |  | -       |          |          |          |
| N                      | -8.16025 | -5.04367 | -7.85282 | -6.26881 |  | 7.57526 | -6.17939 | -6.64872 | -6.88252 |
| P23284 PPIB_HUMAN      | -6.61723 | -5.24628 | -4.98606 | -4.33283 |  | -       |          |          |          |
| P12814 ACTN1_HUMAN     | -4.97388 | -4.43516 | -3.44786 | -2.52677 |  | 5.37252 | -3.54947 | -4.97001 | -3.87262 |
| P40199 CEAM6_HUMAN     |          |          |          |          |  | -       |          |          |          |
| Q02818 NUCB1_HUMAN     | -7.64932 | -7.32828 | -8.03609 | -6.38404 |  | 4.08753 | -2.49518 | -4.25955 | -3.08232 |
| P49788 TIG1_HUMAN      | -6.58194 | -4.54477 | -5.47393 | -3.87906 |  | -       |          |          |          |
| P06703 S10A6_HUMAN     | -2.1912  | -3.96216 | -2.39324 | -0.6731  |  | 7.92584 | -7.96956 | -8.01917 | -7.61123 |
| P16401 H15_HUMAN       |          |          |          |          |  | -       |          |          |          |
| O60437 PEPL_HUMAN      | -4.71527 | -4.5745  | -4.55767 | -3.70047 |  | 5.34251 | -4.59307 | -4.95654 | -4.93929 |
| P47929 LEG7_HUMAN      | -9.08128 | -7.98398 | -6.06705 | -8.36113 |  | -       |          |          |          |
| Q14508 WFDC2_HUMAN     | -5.66264 | -3.19849 | -4.48072 | -3.19129 |  | 1.03082 | 0.350935 | -2.27206 | -1.14158 |
| Q13835 PKP1_HUMAN      |          |          |          |          |  | -       |          |          |          |
| P02750 A2GL_HUMAN      | -7.00383 | -5.56221 | -5.78697 | -4.81226 |  | 4.62388 | -4.10128 | -4.52138 | -3.57806 |
| P21926 CD9_HUMAN       | -5.85422 | -5.32619 | -4.91784 | -4.26445 |  | -       |          |          |          |
| P19961 AMY2B_HUMAN     |          |          |          |          |  | 8.20389 | -9.02615 |          | -8.03894 |
| P0DTE7 AMY1B_HUMAN     |          |          |          |          |  | -       |          |          |          |
| P04746 AMYP_HUMAN      |          |          |          |          |  | 4.68571 | -2.1067  | -2.83318 | -4.71558 |
| P04745 AMY1A_HUMAN     |          |          |          |          |  | -       |          |          |          |
| P0DTE8 AMY1C_HUMAN     |          |          |          |          |  | 6.14577 | -4.91463 | -5.4201  | -5.76258 |
| Q9UBC9 SPRR3_HUMAN     |          |          |          |          |  | -5.1392 | -4.28118 | -5.63673 | -4.51685 |
| Q96QA5 GSDMA_HUMAN     | -7.51023 | -8.14354 | -7.40532 | -6.87876 |  | -       |          |          |          |
| Q13296 SG2A2_HUMAN     |          |          |          |          |  | 7.80045 | -6.82645 | -7.21608 | -7.31294 |

|                        |          |          |          |          |         |          |          |          |  |
|------------------------|----------|----------|----------|----------|---------|----------|----------|----------|--|
| Q14002 CEAM7_HUMAN     |          |          |          |          |         |          |          |          |  |
| P62753 RS6_HUMAN       |          |          |          |          |         |          |          |          |  |
| P09429 HMGB1_HUMAN     | -4.30619 | -1.71702 | -3.34483 | -1.70355 | 2.77246 | -2.4302  | -1.90966 | -2.94153 |  |
| P83731 RL24_HUMAN      | -4.24888 | -1.49214 | -3.60613 | -2.15367 | 3.05259 | -2.33765 | -1.51951 | -4.78521 |  |
| Q96S96 PEBP4_HUMAN     | -8.43422 | -7.01777 | -7.70114 | -6.73085 | -7.9309 | -6.92821 | -6.97107 | -6.29901 |  |
| Q5SNV9 CA167_HUMAN     |          |          |          |          |         |          |          |          |  |
| Q6ZR08 DYH12_HUMAN     |          |          |          |          |         |          |          |          |  |
| P07910 HNRPC_HUMAN     |          |          |          |          |         |          |          |          |  |
| Q9UKZ1 CNO11_HUMAN     |          |          |          |          |         |          |          |          |  |
| P20933 ASPG_HUMAN      | -8.91962 | -7.05798 | -7.78844 | -7.08251 | 7.47987 | -6.89319 | -6.87673 | -6.68542 |  |
| Q8IZL8 PELP1_HUMAN     |          |          |          |          |         |          |          |          |  |
| P00505 AATM_HUMAN      |          |          |          |          |         |          |          |          |  |
| P48634 PRC2A_HUMAN     |          |          |          |          |         |          |          |          |  |
| Q96G74 OTUD5_HUMAN     |          |          |          |          |         |          |          |          |  |
| Q8IVF2 AHNK2_HUMAN     |          |          |          |          |         |          |          |          |  |
| Q8TF72 SHRM3_HUMAN     |          |          |          |          |         |          |          |          |  |
| Q14966 ZN638_HUMAN     |          |          |          |          |         |          |          |          |  |
| Q7LBE3 S26A9_HUMAN     |          |          |          |          |         |          |          |          |  |
| A6NKD9 CC85C_HUMAN     |          |          |          |          |         |          |          |          |  |
| A0A0B4J1U7 HV601_HUMAN |          |          |          |          |         |          |          |          |  |
| Q6PID8 KLD10_HUMAN     |          |          |          |          |         |          |          |          |  |
| Q99574 NEUS_HUMAN      | -8.56902 | -7.88389 | -8.4361  | -7.08585 | -8.1909 | -7.05565 | -8.65176 | -7.47865 |  |
| Q14526 HIC1_HUMAN      |          |          |          |          |         |          |          |          |  |
| Q5VSY0 GKAP1_HUMAN     |          |          |          |          |         |          |          |          |  |
| Q8TCU6 PREX1_HUMAN     |          |          |          |          |         |          |          |          |  |
| Q7Z2W7 TRPM8_HUMAN     |          |          |          |          |         |          |          |          |  |
| Q14106 TOB2_HUMAN      |          |          |          |          |         |          |          |          |  |
| Q9GZQ3 COMD5_HUMAN     |          |          |          |          |         |          |          |          |  |
| Q8NHQ8 RASF8_HUMAN     |          |          |          |          |         |          |          |          |  |
| P01703 LV140_HUMAN     |          |          |          |          |         |          |          |          |  |

|                        |          |          |          |          |         |          |          |          |  |
|------------------------|----------|----------|----------|----------|---------|----------|----------|----------|--|
| O75882 ATRN_HUMAN      |          |          |          |          |         |          |          |          |  |
| O60902 SHOX2_HUMAN     |          |          |          |          |         |          |          |          |  |
| Q5VSP4 LC1L1_HUMAN     |          |          |          |          |         |          |          |          |  |
| P01861 IGHG4_HUMAN     | -4.91207 | -5.04155 | -3.38423 | -2.90468 | 3.58795 | -2.78477 | -4.26827 | -3.79868 |  |
| O95678 K2C75_HUMAN     | -5.61133 | -5.37615 | -4.58762 | -4.96475 | 5.40254 | -4.91469 | -5.35821 | -2.53656 |  |
| P0DOX6 IGM_HUMAN       |          |          |          |          |         |          |          |          |  |
| Q86YZ3 HORN_HUMAN      | -7.27215 | -7.26899 | -7.81488 | -9.86051 | 8.71528 | -6.79401 | -7.69767 | -9.18194 |  |
| Q14525 KT33B_HUMAN     |          |          |          |          |         |          |          |          |  |
| Q562R1 ACTBL_HUMAN     |          |          |          |          |         |          |          |          |  |
| P31946 I433B_HUMAN     | -6.79135 | -8.43515 | -5.15249 | -4.54754 | 5.20978 | -4.55441 | -5.53669 | -5.63332 |  |
| Q7Z3Y8 K1C27_HUMAN     |          |          |          |          |         |          |          |          |  |
| P01780 HV307_HUMAN     | -6.80378 | -3.86966 | -5.98537 | -4.77197 | 6.01753 | -4.6396  | -4.69831 | -5.51699 |  |
| A0A0J9YX35 HV64D_HUMAN |          |          |          |          |         |          |          |          |  |
| A0A0J9YXX1 HV5X1_HUMAN |          |          |          |          |         |          |          |          |  |
| A0A0C4DH38 HV551_HUMAN | -6.58894 | -3.31501 | -5.75118 | -4.40615 | 5.78328 | -4.21953 | -4.58842 | -5.30509 |  |
| P28799 GRN_HUMAN       | -9.16222 | -9.06958 | -9.43948 | -7.1543  | 8.46922 | -7.68361 | -9.18824 | -8.06698 |  |
| P01762 HV311_HUMAN     |          |          |          |          |         |          |          |          |  |
| Q7Z3Y9 K1C26_HUMAN     |          |          |          |          |         |          |          |          |  |
| Q15149 PLEC_HUMAN      | -5.4555  | -8.37843 | -5.93255 | -6.31615 | 6.66568 | -6.0304  | -7.30211 | -4.4488  |  |
| Q7Z406 MYH14_HUMAN     | -6.51801 | -6.82209 | -6.24599 | -5.0996  | 6.51595 | -5.07186 | -6.17948 | -5.05347 |  |
| P06731 CEAM5_HUMAN     | -5.08703 | -3.39296 | -4.17574 | -2.93272 | -3.8197 | -3.14534 | -3.92199 | -3.07586 |  |
| P04632 CPNS1_HUMAN     | -5.6949  | -5.92547 | -5.78485 | -4.16763 | 5.22338 | -4.25169 | -5.84309 | -4.19521 |  |
| Q07666 KHDR1_HUMAN     |          |          |          |          |         |          |          |          |  |
| O60716 CTND1_HUMAN     |          |          |          |          |         |          |          |          |  |
| P01611 KVD12_HUMAN     |          |          |          |          |         |          |          |          |  |



|                        |          |          |          |          |         |          |          |          |
|------------------------|----------|----------|----------|----------|---------|----------|----------|----------|
| A0A0C4DH72 KV106_HUMAN | -7.39738 | -4.87933 | -7.25759 | -6.51427 | 7.13025 | -5.03281 | -5.95253 | -6.06684 |
| P08246 ELNE_HUMAN      | -8.19162 | -6.10132 | -6.53036 | -6.10126 | 7.29232 | -5.89295 | -6.30654 | -4.37846 |
| A0A075B6R9 KVD24_HUMAN |          |          |          |          |         |          |          |          |
| A0A0C4DH68 KV224_HUMAN |          |          |          |          |         |          |          |          |
| P40121 CAPG_HUMAN      |          |          |          |          |         |          |          |          |
| O76021 RL1D1_HUMAN     |          |          |          |          |         |          |          |          |
| A0A075B6H7 KV37_HUMAN  |          |          |          |          |         |          |          |          |
| P42357 HUTH_HUMAN      | -9.89324 | -8.95714 | -10.0935 | -9.79523 | 9.79649 | -9.92233 |          | -8.981   |
| P13797 PLST_HUMAN      | -7.9307  | -7.21131 | -7.25345 | -5.46312 | -6.1685 | -5.76487 | -6.2574  | -6.02897 |
| P04211 LV743_HUMAN     | -6.149   | -2.80097 | -5.41374 | -3.55872 | 5.31662 | -3.864   | -4.19606 | -4.21531 |
| A0A075B6I9 LV746_HUMAN | -6.149   | -2.80097 | -5.41374 | -3.55872 | 5.31662 | -3.864   | -4.19606 | -4.21531 |
| P55064 AQP5_HUMAN      | -6.93952 | -6.45519 | -7.62426 | -5.2467  | 6.59373 | -4.6039  | -6.58588 | -5.74359 |
| P07951 TPM2_HUMAN      |          |          |          |          |         |          |          |          |
| P09493 TPM1_HUMAN      |          |          |          |          |         |          |          |          |
| P22735 TGM1_HUMAN      | -5.83481 | -5.57766 | -5.2194  | -5.51134 | -5.7776 | -5.77444 | -5.61703 | -5.11588 |
| P01701 LV151_HUMAN     | -6.80291 | -3.87512 | -6.04436 | -4.9774  | 6.36271 | -4.48782 | -4.78764 | -5.38533 |
| P49840 GSK3A_HUMAN     |          |          |          |          |         |          |          |          |
| P0DOX3 IGD_HUMAN       |          |          |          |          |         |          |          |          |
| P10809 CH60_HUMAN      |          |          |          |          |         |          |          |          |
| P02679 FIBG_HUMAN      |          |          |          |          |         |          |          |          |
| Q9UPP2 IQEC3_HUMAN     |          |          |          |          |         |          |          |          |
| A0A075B6I0 LV861_HUMAN | -7.08247 | -4.13818 | -6.63797 | -5.09069 | 6.08893 | -5.02981 | -5.20283 | -5.74729 |
| Q86V81 THOC4_HUMAN     |          |          |          |          |         |          |          |          |
| P22681 CBL_HUMAN       |          |          |          |          |         |          |          |          |
| Q9BVC4 LST8_HUMAN      |          |          |          |          |         |          |          |          |
| Q9BWS9 CHID1_HUMAN     |          |          |          |          |         |          |          |          |
| Q7RTR2 NLRC3_HUMAN     |          |          |          |          |         |          |          |          |

|                        |          |          |          |          |         |          |          |          |  |
|------------------------|----------|----------|----------|----------|---------|----------|----------|----------|--|
| Q8N6G6 ATL1_HUMAN      |          |          |          |          |         |          |          |          |  |
| P67809 YBOX1_HUMAN     |          |          |          |          |         |          |          |          |  |
| Q8IZ21 PHAR4_HUMAN     |          |          |          |          |         |          |          |          |  |
| Q8WXS5 CCG8_HUMAN      |          |          |          |          |         |          |          |          |  |
| Q9ULD2 MTUS1_HUMAN     |          |          |          |          |         |          |          |          |  |
| Q86SM8 MRGRE_HUMAN     |          |          |          |          |         |          |          |          |  |
| Q13283 G3BP1_HUMAN     |          |          |          |          |         |          |          |          |  |
| Q9NSA2 KCND1_HUMAN     |          |          |          |          |         |          |          |          |  |
| Q15323 K1H1_HUMAN      | -4.17708 | -4.93801 | -4.24206 | -4.18249 | 4.79533 | -4.44926 | -5.99873 | -1.95164 |  |
| O43790 KRT86_HUMAN     | -4.48144 | -3.39891 | -2.53705 | -3.00303 | 3.65534 | -2.74812 | -3.55749 | -0.76342 |  |
| Q14533 KRT81_HUMAN     | -4.48144 | -3.39891 | -2.53705 | -3.00303 | 3.65534 | -2.74812 | -3.55749 | -0.76342 |  |
| P62258 I433E_HUMAN     | -4.11569 | -4.34477 | -3.05917 | -2.12323 | 2.93685 | -2.06779 | -3.45932 | -2.40907 |  |
| Q13228 SBP1_HUMAN      | -4.40748 | -3.65098 | -3.17256 | -2.40094 | 3.10015 | -2.11609 | -1.91753 | -2.3252  |  |
| P78386 KRT85_HUMAN     | -7.25786 | -6.9796  | -7.22482 | -7.16058 | 8.31982 | -6.17409 | -7.0963  | -4.57443 |  |
| P13929 ENOB_HUMAN      | -6.50825 | -6.34273 | -5.22486 | -4.88355 | 5.40959 | -4.45062 | -4.87252 | -4.86023 |  |
| A0A0C4DH42 HV366_HUMAN | -6.89198 | -4.96209 | -6.39115 | -5.35685 | 6.73003 | -5.28739 | -6.10449 | -5.88278 |  |
| P02790 HEMO_HUMAN      | -3.43745 | -2.97528 | -1.74519 | -1.35793 | 2.29697 | -1.20155 | -2.19095 | -2.31953 |  |
| P22392 NDKB_HUMAN      | -3.73656 | -3.13496 | -2.56887 | -1.82875 | 2.28584 | -1.37721 | -2.08843 | -1.75179 |  |
| P37802 TAGL2_HUMAN     | -5.7052  | -5.85157 | -5.2137  | -3.95425 | 4.85253 | -3.33181 | -4.94956 | -3.92075 |  |
| P29508 SPB3_HUMAN      | -4.51857 | -3.70505 | -1.96383 | -4.00041 | 3.92863 | -3.98598 | -3.65727 | -1.31898 |  |
| P18510 IL1RA_HUMAN     | -4.70884 | -3.29074 | -3.17032 | -2.57111 | 3.57835 | -1.33317 | -2.00326 | -3.02583 |  |
| P30041 PRDX6_HUMAN     | -3.47651 | -2.61504 | -1.5214  | -1.17344 | -2.2684 | -1.15377 | -2.18669 | -1.59477 |  |
| P15259 PGAM2_HUMAN     | -5.11342 | -4.55631 | -4.2178  | -3.389   | 3.55468 | -2.62181 | -3.12219 | -3.30111 |  |

|                    |          |          |          |          |         |          |          |          |
|--------------------|----------|----------|----------|----------|---------|----------|----------|----------|
| P18669 PGAM1_HUMAN | -5.11342 | -4.55631 | -4.2178  | -3.389   | 3.55468 | -2.62181 | -3.12219 | -3.30111 |
| P48594 SPB4_HUMAN  | -9.82264 | -8.46948 | -7.79307 | -8.15757 | 9.14716 | -8.57415 | -8.56066 | -7.77155 |
| P0DP24 CALM2_HUMAN | -5.65717 | -4.59385 | -4.44521 | -3.86491 | 4.49524 | -3.23203 | -4.40989 | -4.70983 |
| P0DP23 CALM1_HUMAN | -5.65717 | -4.59385 | -4.44521 | -3.86491 | 4.49524 | -3.23203 | -4.40989 | -4.70983 |
| P0DP25 CALM3_HUMAN | -5.65717 | -4.59385 | -4.44521 | -3.86491 | 4.49524 | -3.23203 | -4.40989 | -4.70983 |
| P05387 RLA2_HUMAN  | -7.291   | -8.16967 | -6.49571 | -4.72647 | 5.72775 | -5.69407 | -6.63956 | -6.38512 |
| P04080 CYTB_HUMAN  | -5.41787 | -4.87593 | -3.72668 | -3.33346 | 3.78392 | -2.04119 | -3.35767 | -3.79937 |
| P22626 ROA2_HUMAN  | -6.1705  | -5.83755 | -5.04964 | -4.08416 | 5.12345 | -3.89426 | -6.14347 | -4.76078 |
| O75223 GGCT_HUMAN  | -3.99396 | -3.92174 | -2.63482 | -2.52724 | 3.02415 | -2.98629 | -3.27432 | -1.91831 |
| P37837 TALDO_HUMAN | -4.91886 | -5.07225 | -3.92318 | -2.76881 | 3.37951 | -2.60424 | -4.00236 | -3.35693 |
| P27482 CALL3_HUMAN | -7.63055 | -9.08008 | -6.16193 | -5.73248 | 6.37738 | -5.79767 | -7.69015 | -6.0121  |
| O00299 CLIC1_HUMAN | -7.33671 | -6.09223 | -6.46397 | -5.44488 | 6.48856 | -5.02357 | -5.58803 | -5.72695 |
| P08582 TRFM_HUMAN  | -7.65534 | -5.85169 | -6.45439 | -4.7333  | 5.87237 | -6.70026 | -6.0295  | -5.01724 |
| Q9HC84 MUC5B_HUMAN |          |          | -9.98007 | -10.081  | 11.1434 |          |          | -9.91286 |
| P0DME0 SETLP_HUMAN | -6.56103 | -6.44724 | -5.79162 | -4.69304 | 5.67568 | -4.67097 | -6.32707 | -5.17235 |
| Q01105 SET_HUMAN   | -6.56103 | -6.44724 | -5.79162 | -4.69304 | 5.67568 | -4.67097 | -6.32707 | -5.17235 |
| P02511 CRYAB_HUMAN | -3.2947  | -3.9123  | -3.21266 | -2.2971  | -2.5448 | -2.25792 | -3.11721 | -2.44593 |
| P01008 ANT3_HUMAN  | -4.78747 | -5.75364 | -3.37387 | -2.54329 | 3.43272 | -2.62144 | -3.98387 | -3.28741 |
| P08571 CD14_HUMAN  | -7.81051 | -6.62411 | -7.49835 | -6.26856 | 7.42417 | -5.92799 | -7.02679 | -6.0694  |

|                        |          |          |          |          |         |          |          |          |
|------------------------|----------|----------|----------|----------|---------|----------|----------|----------|
| A0A075B6S9 KV137_HUMAN | -7.61498 | -4.85708 | -7.04683 | -5.70781 | 7.20755 | -5.45858 | -6.31846 | -5.97282 |
| P0DSN7 KVD37_HUMAN     | -7.61498 | -4.85708 | -7.04683 | -5.70781 | 7.20755 | -5.45858 | -6.31846 | -5.97282 |
| P06454 PTMA_HUMAN      | -5.72791 | -6.89739 | -4.62996 | -3.42207 | -4.446  | -3.32724 | -4.58215 | -4.70171 |
| P08294 SODE_HUMAN      | -7.38256 | -6.15283 | -5.93242 | -5.17165 | 6.04001 | -4.59804 | -5.4324  | -6.11265 |
| Q9HAV0 GBB4_HUMAN      | -6.62464 | -7.21588 | -7.12097 | -5.60596 | 6.47456 | -5.6108  | -7.35845 | -5.1293  |
| P62873 GBB1_HUMAN      | -6.62464 | -7.21588 | -7.12097 | -5.60596 | 6.47456 | -5.6108  | -7.35845 | -5.1293  |
| P62879 GBB2_HUMAN      | -6.62464 | -7.21588 | -7.12097 | -5.60596 | 6.47456 | -5.6108  | -7.35845 | -5.1293  |
| P16520 GBB3_HUMAN      | -6.62464 | -7.21588 | -7.12097 | -5.60596 | 6.47456 | -5.6108  | -7.35845 | -5.1293  |
| P25705 ATPA_HUMAN      | -4.37077 | -5.40433 | -4.12356 | -4.33505 | 4.74399 | -4.40481 | -5.16939 | -3.71175 |
| P08670 VIME_HUMAN      | -8.08042 | -7.69675 | -6.6943  | -6.33172 | 7.48986 | -6.26106 | -7.44567 | -6.13101 |
| P61158 ARP3_HUMAN      | -9.05756 | -8.72536 | -8.1035  | -6.49922 | 7.51775 | -7.10121 | -8.26006 | -6.62985 |
| Q9H0U4 RAB1B_HUMAN     | -7.1847  | -7.97987 | -7.11777 | -5.28224 | 6.60249 | -5.26575 | -6.7804  | -5.1925  |
| Q92928 RAB1C_HUMAN     | -7.1847  | -7.97987 | -7.11777 | -5.28224 | 6.60249 | -5.26575 | -6.7804  | -5.1925  |
| P62820 RAB1A_HUMAN     | -7.1847  | -7.97987 | -7.11777 | -5.28224 | 6.60249 | -5.26575 | -6.7804  | -5.1925  |
| Q92930 RAB8B_HUMAN     | -7.1847  | -7.97987 | -7.11777 | -5.28224 | 6.60249 | -5.26575 | -6.7804  | -5.1925  |
| P61026 RAB10_HUMAN     | -7.1847  | -7.97987 | -7.11777 | -5.28224 | 6.60249 | -5.26575 | -6.7804  | -5.1925  |
| P59190 RAB15_HUMAN     | -7.1847  | -7.97987 | -7.11777 | -5.28224 | 6.60249 | -5.26575 | -6.7804  | -5.1925  |
| Q15286 RAB35_HUMAN     | -7.1847  | -7.97987 | -7.11777 | -5.28224 | 6.60249 | -5.26575 | -6.7804  | -5.1925  |
| P51153 RAB13_HUMAN     | -7.1847  | -7.97987 | -7.11777 | -5.28224 | 6.60249 | -5.26575 | -6.7804  | -5.1925  |

|                    |          |          |          |          |         |          |          |          |
|--------------------|----------|----------|----------|----------|---------|----------|----------|----------|
| P61006 RAB8A_HUMAN | -7.1847  | -7.97987 | -7.11777 | -5.28224 | 6.60249 | -5.26575 | -6.7804  | -5.1925  |
| P61160 ARP2_HUMAN  | -7.6351  | -7.59788 | -6.70616 | -5.68873 | 6.46928 | -5.25101 | -6.39611 | -5.68223 |
| P06576 ATPB_HUMAN  | -7.50531 | -9.81627 | -7.12065 | -6.84683 | 6.90698 | -6.7732  |          | -6.121   |
| P60660 MYL6_HUMAN  | -5.19404 | -5.07053 | -4.33036 | -3.56059 | 4.54523 | -3.74432 | -4.668   | -3.84131 |
| P14649 MYL6B_HUMAN | -5.19404 | -5.07053 | -4.33036 | -3.56059 | 4.54523 | -3.74432 | -4.668   | -3.84131 |
| P05386 RLA1_HUMAN  | -8.29723 | -8.42305 | -7.15994 | -6.25613 | 6.95541 | -6.44121 | -8.41282 | -7.25191 |
| Q14764 MVP_HUMAN   | -7.30854 | -9.04394 | -7.98702 | -6.57124 | 7.60539 | -7.50629 | -7.98846 | -6.11973 |
| Q14118 DAG1_HUMAN  | -7.98463 | -7.08307 | -7.70306 | -6.19199 | 7.27903 | -6.73243 | -7.22692 | -6.25563 |
| P04217 A1BG_HUMAN  | -7.44709 | -6.4902  | -6.09173 | -5.89844 | 7.25831 | -5.56164 | -6.11256 | -6.30114 |
| P36952 SPB5_HUMAN  | -5.68609 | -5.61546 | -4.90729 | -3.8146  | 4.29227 | -3.72917 | -4.70432 | -3.72984 |
| Q02809 PLOD1_HUMAN | -8.34341 | -7.87959 | -8.18377 | -6.92336 | -8.269  | -6.99541 | -8.61344 | -7.18841 |
| Q6ZVX7 FBX50_HUMAN | -5.96179 | -5.70438 | -4.95305 | -4.52522 | 5.34794 | -4.54055 | -5.2544  | -5.01756 |
| P14174 MIF_HUMAN   | -7.06236 | -7.01663 | -5.85675 | -6.03936 | 5.99429 | -4.40638 | -5.8085  | -5.6304  |
| Q58FF3 ENPLL_HUMAN | -6.34338 | -6.68887 | -5.97699 | -5.46155 | 6.55396 | -5.41358 | -6.37033 | -5.46448 |
| P14625 ENPL_HUMAN  | -6.34338 | -6.68887 | -5.97699 | -5.46155 | 6.55396 | -5.41358 | -6.37033 | -5.46448 |
| P25786 PSA1_HUMAN  | -7.37038 | -6.5536  | -5.71457 | -5.32016 | -6.194  | -5.05472 | -5.91449 | -6.03237 |
| O95436 NPT2B_HUMAN | -8.45748 | -6.62261 | -8.98196 | -6.26085 | 7.62421 | -6.19595 | -7.32892 | -7.48391 |
| P13489 RINI_HUMAN  | -6.63335 | -6.68831 | -5.90595 | -5.0036  | -5.7202 | -4.94995 | -5.8604  | -5.18513 |
| Q9UL46 PSME2_HUMAN | -6.8014  | -6.89024 | -5.94566 | -4.10112 | 4.95846 | -4.5136  | -5.27725 | -4.61211 |
| P36955 PEDF_HUMAN  | -9.2427  | -8.98854 | -8.42665 | -7.39017 | 8.76255 | -7.65599 | -9.28224 | -7.70928 |

|                    |          |          |          |          |         |          |          |          |
|--------------------|----------|----------|----------|----------|---------|----------|----------|----------|
| P60981 DEST_HUMAN  | -7.20333 | -6.98786 | -7.21604 | -4.93522 | 5.62581 | -4.92284 | -5.62827 | -5.28683 |
| P62913 RL11_HUMAN  | -7.98183 | -8.51996 | -7.10188 | -6.48777 | 7.60015 | -5.95558 | -8.0836  | -6.33405 |
| O75888 TNF13_HUMAN | -6.91224 | -6.54336 | -6.43524 | -6.00339 | 7.37252 | -6.36723 | -6.72843 | -4.96454 |
| P57723 PCBP4_HUMAN | -5.45258 | -5.48868 | -5.55691 | -4.40351 | 4.96111 | -4.30208 | -5.31892 | -3.68026 |
| Q15365 PCBP1_HUMAN | -5.45258 | -5.48868 | -5.55691 | -4.40351 | 4.96111 | -4.30208 | -5.31892 | -3.68026 |
| P57721 PCBP3_HUMAN | -5.45258 | -5.48868 | -5.55691 | -4.40351 | 4.96111 | -4.30208 | -5.31892 | -3.68026 |
| Q15366 PCBP2_HUMAN | -5.45258 | -5.48868 | -5.55691 | -4.40351 | 4.96111 | -4.30208 | -5.31892 | -3.68026 |
| P15309 PPAP_HUMAN  | -9.47002 |          | -8.99957 | -8.0643  | 9.06233 | -8.5929  | -8.71589 | -8.10219 |
| P62491 RB11A_HUMAN | -8.16482 | -8.92975 | -7.3095  | -6.43707 | 7.22432 | -6.99127 | -8.89639 | -6.3383  |
| Q15907 RB11B_HUMAN | -8.16482 | -8.92975 | -7.3095  | -6.43707 | 7.22432 | -6.99127 | -8.89639 | -6.3383  |
| Q13867 BLMH_HUMAN  | -9.52159 | -8.93319 | -8.24747 | -8.29861 | 9.00812 | -6.57861 | -8.10729 | -7.20246 |
| P33241 LSP1_HUMAN  | -6.44934 | -7.45803 | -6.38395 | -5.2852  | 5.94663 | -5.62009 | -6.12383 | -5.08728 |
| P27635 RL10_HUMAN  | -5.61205 | -6.35664 | -5.65799 | -4.98563 | 5.48902 | -4.83595 | -6.04915 | -4.52613 |
| O75083 WDR1_HUMAN  | -6.74913 | -6.08706 | -6.01812 | -5.00557 | 5.42793 | -4.62304 | -5.13631 | -5.01018 |
| P09467 F16P1_HUMAN | -7.14372 | -6.31041 | -6.6134  | -5.01476 | 5.61244 | -4.64299 | -4.87252 | -5.45379 |
| P02452 CO1A1_HUMAN | -11.6563 |          |          |          |         |          |          |          |
| P18124 RL7_HUMAN   | -7.90379 | -8.98854 | -7.22401 | -6.54374 | 7.38268 | -6.01226 | -9.10881 | -6.22857 |
| P62899 RL31_HUMAN  | -6.44007 | -6.58924 | -6.10237 | -5.31583 | 6.18432 | -5.47916 | -6.24514 | -4.92432 |
| P25789 PSA4_HUMAN  | -6.95975 | -6.82376 | -5.56072 | -5.26725 | 6.28714 | -4.73726 | -5.92453 | -5.70261 |
| Q9UN76 S6A14_HUMAN | -6.09481 | -5.00008 | -6.09953 | -4.31554 | -5.7134 | -4.03271 | -5.33993 | -5.19296 |

|                    |          |          |          |          |         |          |          |          |
|--------------------|----------|----------|----------|----------|---------|----------|----------|----------|
| P06748 NPM_HUMAN   | -7.38392 | -4.91659 | -6.10708 | -6.43763 | 7.05253 | -5.3366  | -5.44122 | -5.9857  |
| O43516 WIPF1_HUMAN | -9.54408 | -8.9209  | -8.28815 | -7.86338 | 8.79144 | -7.73466 | -8.10192 | -6.44138 |
| Q99497 PARK7_HUMAN | -7.18607 | -6.85945 | -5.90975 | -5.49373 | 6.04711 | -5.46676 | -5.27544 | -5.18146 |
| Q86X10 RLGPB_HUMAN | -10.54   | -9.62665 | -9.42808 |          | 10.9103 |          |          | -9.71882 |
| P40939 ECHA_HUMAN  | -8.08297 | -6.28079 | -6.66802 | -6.03457 | 7.69186 | -6.27167 | -6.88302 | -6.46017 |
| P09668 CATH_HUMAN  | -6.33526 | -4.20765 | -5.23408 | -4.70853 | 5.62692 | -4.64903 | -4.80538 | -4.02772 |
| O14497 ARI1A_HUMAN | -8.76794 | -7.79038 | -7.32139 | -7.06114 | 8.69659 | -6.59941 | -8.38313 | -7.63731 |
| Q13200 PSMD2_HUMAN | -8.12463 | -8.37509 | -6.5779  | -6.58847 | 8.08088 | -5.70516 | -8.11986 | -6.68484 |
| Q96SC8 DMTA2_HUMAN | -5.98054 | -4.32207 | -5.21147 | -4.88192 | 5.80146 | -4.69955 | -5.13216 | -5.16739 |
| Q14574 DSC3_HUMAN  | -5.44596 | -6.00447 | -5.37764 | -5.3269  | 5.49627 | -5.78739 | -5.90199 | -4.69185 |
| Q9UPN9 TRI33_HUMAN | -9.4489  | -6.79283 | -8.63331 | -8.03309 | 8.27635 | -7.68937 | -7.1009  | -8.54784 |
| P08174 DAF_HUMAN   | -7.25235 | -4.97988 | -6.55677 | -4.7169  | 5.98898 | -5.12385 | -5.66228 | -5.92664 |
| P06727 APOA4_HUMAN | -10.1223 |          | -9.21932 | -7.96827 | 8.99801 | -8.02797 | -8.70908 | -8.48499 |
| Q5T1R4 ZEP3_HUMAN  |          |          | -9.8324  |          |         |          |          | -10.538  |
| Q96JM2 ZN462_HUMAN | -8.3478  | -7.60107 | -7.94204 | -7.05639 | 7.96857 | -6.74039 | -6.12652 | -8.34219 |
| Q96RY5 CRML_HUMAN  | -7.30258 | -6.54718 | -6.50717 | -6.07265 | 7.43144 | -6.06845 | -6.68703 | -6.5525  |
| P04179 SODM_HUMAN  | -6.11379 | -5.38731 | -4.75793 | -4.09417 | 5.26823 | -3.8032  | -4.81572 | -4.52694 |

#### Supplementary Table 4

*Comparison of Protein Abundance to Protein Characteristics*

| <b>Protein Characteristic</b>               | <b>Comfilco<br/>n A</b> | <b>Delefilco<br/>n A</b> | <b>Etafilco<br/>n A</b> | <b>Lotrafilco<br/>n B</b> | <b>Nelfilco<br/>n A</b> | <b>Nesofilco<br/>n A</b> | <b>Senofilco<br/>n A</b> | <b>Verofilco<br/>n A</b> |
|---------------------------------------------|-------------------------|--------------------------|-------------------------|---------------------------|-------------------------|--------------------------|--------------------------|--------------------------|
| <b>sequence length</b>                      | -0.14439                | -0.12755                 | -0.16494                | -0.1132                   | -0.14865                | -0.16288                 | -0.14403                 | -0.13945                 |
| <b>molecular weight</b>                     | -0.14251                | -0.12572                 | -0.16248                | -0.11225                  | -0.14652                | -0.16088                 | -0.14206                 | -0.13701                 |
| <b>aromaticity</b>                          | 0.096878                | 0.057953                 | 0.07167                 | 0.067598                  | 0.070676                | 0.072862                 | 0.08059                  | 0.062632                 |
| <b>instability index</b>                    | -0.08959                | -0.10268                 | -0.11722                | -0.04137                  | -0.12734                | -0.1202                  | -0.10312                 | -0.11621                 |
| <b>gravy</b>                                | 0.023184                | -0.02195                 | -0.00599                | 0.000653                  | 0.003694                | -0.00038                 | 0.008747                 | 0.009649                 |
| <b>isoelectric point</b>                    | 0.02804                 | 0.001145                 | 0.007234                | 0.04542                   | -0.01361                | 0.00736                  | 0.015488                 | 0.004496                 |
| <b>charge at pH</b>                         | 0.046491                | 0.017927                 | 0.027934                | 0.063075                  | 0.008142                | 0.029575                 | 0.038448                 | 0.025835                 |
| <b>molar extinction coefficient reduced</b> | -0.06366                | -0.09049                 | -0.11308                | -0.04232                  | -0.09822                | -0.11545                 | -0.08071                 | -0.09736                 |
| <b>molar extinction coefficient</b>         | -0.06406                | -0.09082                 | -0.11355                | -0.04355                  | -0.09867                | -0.11585                 | -0.08099                 | -0.09735                 |
| <b>percent content A</b>                    | -0.07239                | -0.0598                  | -0.04434                | -0.04989                  | -0.04452                | -0.04957                 | -0.05005                 | -0.05431                 |
| <b>percent content C</b>                    | 0.029373                | -0.02959                 | -0.01652                | 0.012303                  | -0.01736                | -0.01156                 | 0.014679                 | -0.00533                 |
| <b>percent content D</b>                    | -0.0719                 | -0.01824                 | -0.01287                | -0.08685                  | -0.00825                | -0.02211                 | -0.05012                 | -0.01734                 |
| <b>percent content E</b>                    | -0.08682                | -0.01658                 | -0.03489                | -0.11329                  | -0.01695                | -0.03604                 | -0.05408                 | -0.03172                 |
| <b>percent content F</b>                    | -0.02627                | -0.00347                 | 0.000614                | -0.05535                  | -0.00157                | -0.00019                 | -0.01538                 | 0.001233                 |
| <b>percent content G</b>                    | -0.04153                | -0.0372                  | -0.06056                | -0.03834                  | -0.05576                | -0.05308                 | -0.04984                 | -0.04381                 |
| <b>percent content H</b>                    | -0.02771                | -0.00584                 | -0.02285                | -0.0277                   | -0.01847                | -0.02777                 | -0.02542                 | -0.00731                 |
| <b>percent content I</b>                    | -0.07075                | -0.03404                 | -0.01569                | -0.11994                  | -0.00574                | -0.01438                 | -0.05667                 | -0.00758                 |
| <b>percent content K</b>                    | 0.111955                | 0.16656                  | 0.181                   | 0.086096                  | 0.173561                | 0.175918                 | 0.147013                 | 0.161273                 |
| <b>percent content L</b>                    | 0.051032                | 0.014933                 | 0.012913                | 0.051306                  | 0.012291                | 0.023228                 | 0.036254                 | 0.019592                 |
| <b>percent content M</b>                    | -0.05882                | -0.03984                 | -0.0391                 | -0.0856                   | -0.03376                | -0.02845                 | -0.04289                 | -0.0317                  |
| <b>percent content N</b>                    | -0.04401                | -0.00499                 | -0.02127                | -0.07644                  | -0.00463                | -0.01155                 | -0.031                   | -0.00896                 |
| <b>percent content P</b>                    | -0.08747                | -0.1254                  | -0.13469                | -0.06734                  | -0.14462                | -0.14335                 | -0.10408                 | -0.14854                 |
| <b>percent content Q</b>                    | 0.061884                | 0.023445                 | 0.00781                 | 0.102999                  | 0.006609                | 0.014846                 | 0.043121                 | 0.003242                 |
| <b>percent content R</b>                    | -0.14089                | -0.12564                 | -0.14123                | -0.09912                  | -0.15082                | -0.14627                 | -0.15125                 | -0.12787                 |
| <b>percent content S</b>                    | 0.061874                | -0.00802                 | -0.01411                | 0.102021                  | -0.00987                | 0.000818                 | 0.026634                 | -0.00246                 |
| <b>percent content T</b>                    | 0.10674                 | 0.078471                 | 0.105347                | 0.08966                   | 0.098689                | 0.091461                 | 0.092344                 | 0.114975                 |
| <b>percent content V</b>                    | 0.089411                | 0.091066                 | 0.087327                | 0.061858                  | 0.103477                | 0.085292                 | 0.085141                 | 0.094052                 |
| <b>percent content W</b>                    | -0.00435                | -0.07243                 | -0.05463                | -0.01267                  | -0.05955                | -0.0609                  | -0.03716                 | -0.06216                 |
| <b>percent content Y</b>                    | 0.174929                | 0.135721                 | 0.137389                | 0.169797                  | 0.140365                | 0.143777                 | 0.156456                 | 0.127259                 |

Molecular weight, aromaticity, instability index, gravy, isoelectric point, charge at pH 7.0, molar extinction coefficient, and percent amino acid content for each SCL material

**Supplementary Table 5**



*Comparison of Proteins Between Etafilcon A and Verofilcon A*

| <b>Uniprot</b> | <b>Protein</b> | <b>Fold Change<br/>(log2)</b> | <b><sup>1</sup>p-value</b> |
|----------------|----------------|-------------------------------|----------------------------|
| A0A075B6K4     | LV310          | 0.03                          | 0.25                       |
| A0A075B6P5     | KV228          | 0.19                          | 0.25                       |
| A0A0A0MS15     | HV349          | 0.03                          | 0.25                       |
| A0A0B4J1X5     | HV374          | 0.03                          | 0.25                       |
| A0A0C4DH31     | HV118          | 0.03                          | 0.25                       |
| A0A0C4DH41     | HV461          | 0.04                          | 0.25                       |
| A0M8Q6         | IGLC7          | 0.02                          | 0.25                       |
| B9A064         | IGLL5          | 0.03                          | 0.25                       |
| P00450         | CERU           | 0.03                          | 0.25                       |
| P00738         | HPT            | 0.02                          | 0.25                       |
| P01011         | AACT           | 0.04                          | 0.25                       |
| P01024         | CO3            | 0.02                          | 0.25                       |
| P01036         | CYTS           | 0.02                          | 0.25                       |
| P01037         | CYTN           | 0.03                          | 0.25                       |
| P01591         | IGJ            | 0.03                          | 0.25                       |
| P01593         | KVD33          | 0.08                          | 0.25                       |
| P01594         | KV133          | 0.08                          | 0.25                       |
| P01615         | KVD28          | 0.19                          | 0.25                       |
| P01619         | KV320          | 0.02                          | 0.25                       |
| P01624         | KV315          | 0.02                          | 0.25                       |
| P01717         | LV325          | 0.03                          | 0.25                       |
| P01824         | HV439          | 0.04                          | 0.25                       |
| P01825         | HV459          | 0.04                          | 0.25                       |
| P01833         | PIGR           | 0.02                          | 0.25                       |
| P01859         | IGHG2          | 0.03                          | 0.25                       |
| P01871         | IGHM           | 0.04                          | 0.25                       |
| P01876         | IGHA1          | 0.02                          | 0.25                       |
| P02533         | K1C14          | 0.03                          | 0.25                       |
| P02647         | APOA1          | 0.03                          | 0.25                       |

|        |       |       |      |
|--------|-------|-------|------|
| P02787 | TRFE  | 0.02  | 0.25 |
| P02788 | TRFL  | 0.13  | 0.25 |
| P03973 | SLPI  | -0.07 | 0.25 |
| P04264 | K2C1  | 0.04  | 0.25 |
| P04406 | G3P   | 0.07  | 0.25 |
| P05089 | ARGI1 | 0.06  | 0.25 |
| P05783 | K1C18 | 0.05  | 0.25 |
| P06312 | KV401 | 0.03  | 0.25 |
| P06331 | HV434 | 0.04  | 0.25 |
| P06744 | G6PI  | 0.05  | 0.25 |
| P07384 | CAN1  | 0.08  | 0.25 |
| P07737 | PROF1 | 0.08  | 0.25 |
| P09228 | CYTT  | 0.02  | 0.25 |
| P0DOX2 | IGA2  | 0.03  | 0.25 |
| P0DOX5 | IGG1  | 0.02  | 0.25 |
| P0DOX7 | IGK   | 0.03  | 0.25 |
| P0DOX8 | IGL1  | 0.03  | 0.25 |
| P0DOY2 | IGLC2 | 0.03  | 0.25 |
| P0DP06 | HVD34 | 0.04  | 0.25 |
| P0DP07 | HV431 | 0.04  | 0.25 |
| P0DP08 | HVD82 | 0.04  | 0.25 |
| P10599 | THIO  | 0.04  | 0.25 |
| P10909 | CLUS  | 0.01  | 0.25 |
| P11142 | HSP7C | 0.04  | 0.25 |
| P12035 | K2C3  | 0.05  | 0.25 |
| P12273 | PIP   | 0.02  | 0.25 |
| P13645 | K1C10 | 0.05  | 0.25 |
| P14923 | PLAK  | 0.03  | 0.25 |
| P15814 | IGLL1 | 0.02  | 0.25 |
| P15924 | DESP  | 0.03  | 0.25 |
| P20061 | TCO1  | 0.02  | 0.25 |
| P20930 | FILA  | 0.05  | 0.25 |
| P22079 | PERL  | 0.04  | 0.25 |

|        |       |       |      |
|--------|-------|-------|------|
| P23083 | HV102 | 0.03  | 0.25 |
| P23284 | PPIB  | 0.05  | 0.25 |
| P25311 | ZA2G  | 0.03  | 0.25 |
| P30044 | PRDX5 | 0.08  | 0.25 |
| P30086 | PEBP1 | 0.06  | 0.25 |
| P30838 | AL3A1 | 0.04  | 0.25 |
| P31941 | ABC3A | 0.03  | 0.25 |
| P31944 | CASPE | 0.07  | 0.25 |
| P32119 | PRDX2 | 0.04  | 0.25 |
| P35527 | K1C9  | 0.04  | 0.25 |
| P35908 | K22E  | 0.05  | 0.25 |
| P52209 | 6PGD  | 0.05  | 0.25 |
| P55058 | PLTP  | 0.02  | 0.25 |
| P61769 | B2MG  | 0.03  | 0.25 |
| P80748 | LV321 | 0.03  | 0.25 |
| P83731 | RL24  | -0.07 | 0.25 |
| Q02413 | DSG1  | 0.04  | 0.25 |
| Q04695 | K1C17 | 0.06  | 0.25 |
| Q08188 | TGM3  | 0.06  | 0.25 |
| Q08380 | LG3BP | 0.01  | 0.25 |
| Q08554 | DSC1  | 0.05  | 0.25 |
| Q13421 | MSLN  | 0.02  | 0.25 |
| Q14515 | SPRL1 | 0.07  | 0.25 |
| Q15517 | CDSN  | 0.05  | 0.25 |
| Q5D862 | FILA2 | 0.07  | 0.25 |
| Q5T749 | KPRP  | 0.04  | 0.25 |
| Q6UWP8 | SBSN  | 0.07  | 0.25 |
| Q7Z5P9 | MUC19 | 0.08  | 0.25 |
| Q7Z794 | K2C1B | 0.06  | 0.25 |
| Q8N474 | SFRP1 | 0.10  | 0.25 |
| Q96DA0 | ZG16B | 0.05  | 0.25 |
| Q96P63 | SPB12 | 0.04  | 0.25 |
| Q96QA5 | GSDMA | 0.04  | 0.25 |

|            |       |      |      |
|------------|-------|------|------|
| Q99574     | NEUS  | 0.04 | 0.25 |
| Q9UGM3     | DMBT1 | 0.04 | 0.25 |
| A0A075B6I9 | LV746 | 0.01 | 0.5  |
| A0A075B6S5 | KV127 | 0.01 | 0.5  |
| A0A0A0MRZ8 | KVD11 | 0.01 | 0.5  |
| A0A0B4J1V0 | HV315 | 0.03 | 0.5  |
| A0A0B4J1V6 | HV373 | 0.01 | 0.5  |
| A0A0C4DH34 | HV428 | 0.01 | 0.5  |
| A0A0C4DH38 | HV551 | 0.01 | 0.5  |
| O00584     | RNT2  | 0.01 | 0.5  |
| O75874     | IDHC  | 0.03 | 0.5  |
| O95678     | K2C75 | 0.08 | 0.5  |
| P00338     | LDHA  | 0.02 | 0.5  |
| P00352     | AL1A1 | 0.03 | 0.5  |
| P00558     | PGK1  | 0.05 | 0.5  |
| P00751     | CFAB  | 0.01 | 0.5  |
| P01009     | A1AT  | 0.03 | 0.5  |
| P01040     | CYTA  | 0.05 | 0.5  |
| P01700     | LV147 | 0.02 | 0.5  |
| P01701     | LV151 | 0.02 | 0.5  |
| P01714     | LV319 | 0.01 | 0.5  |
| P01742     | HV169 | 0.01 | 0.5  |
| P01780     | HV307 | 0.02 | 0.5  |
| P01861     | IGHG4 | 0.01 | 0.5  |
| P02538     | K2C6A | 0.03 | 0.5  |
| P02750     | A2GL  | 0.04 | 0.5  |
| P02763     | A1AG1 | 0.03 | 0.5  |
| P02766     | TTHY  | 0.03 | 0.5  |
| P02768     | ALBU  | 0.02 | 0.5  |
| P02774     | VTDB  | 0.17 | 0.5  |
| P04075     | ALDOA | 0.03 | 0.5  |
| P04211     | LV743 | 0.01 | 0.5  |
| P04259     | K2C6B | 0.02 | 0.5  |

|        |       |       |     |
|--------|-------|-------|-----|
| P04433 | KV311 | 0.01  | 0.5 |
| P04632 | CPNS1 | 0.03  | 0.5 |
| P04792 | HSPB1 | 0.02  | 0.5 |
| P05090 | APOD  | 0.07  | 0.5 |
| P05109 | S10A8 | 0.03  | 0.5 |
| P06396 | GELS  | 0.02  | 0.5 |
| P06702 | S10A9 | 0.04  | 0.5 |
| P06733 | ENOA  | 0.04  | 0.5 |
| P07355 | ANXA2 | 0.04  | 0.5 |
| P07858 | CATB  | 0.02  | 0.5 |
| P07900 | HS90A | 0.04  | 0.5 |
| P08758 | ANXA5 | 0.04  | 0.5 |
| P09211 | GSTP1 | 0.04  | 0.5 |
| P09429 | HMGB1 | -0.04 | 0.5 |
| P0DMV8 | HS71A | 0.02  | 0.5 |
| P0DMV9 | HS71B | 0.02  | 0.5 |
| P11021 | BIP   | 0.03  | 0.5 |
| P12814 | ACTN1 | 0.04  | 0.5 |
| P12830 | CADH1 | 0.04  | 0.5 |
| P14550 | AK1A1 | 0.05  | 0.5 |
| P16403 | H12   | 0.05  | 0.5 |
| P17931 | LEG3  | 0.03  | 0.5 |
| P19012 | K1C15 | 0.24  | 0.5 |
| P21926 | CD9   | 0.02  | 0.5 |
| P21980 | TGM2  | 0.04  | 0.5 |
| P22735 | TGM1  | 0.04  | 0.5 |
| P27348 | 1433T | 0.03  | 0.5 |
| P28799 | GRN   | 0.01  | 0.5 |
| P29401 | TKT   | 0.02  | 0.5 |
| P30085 | KCY   | 0.04  | 0.5 |
| P30740 | ILEU  | 0.03  | 0.5 |
| P31151 | S10A7 | 0.04  | 0.5 |
| P31947 | 1433S | 0.02  | 0.5 |

|        |       |       |     |
|--------|-------|-------|-----|
| P31949 | S10AB | 0.06  | 0.5 |
| P34096 | RNAS4 | -0.01 | 0.5 |
| P40394 | ADH7  | 0.04  | 0.5 |
| P40925 | MDHC  | 0.04  | 0.5 |
| P40926 | MDHM  | 0.03  | 0.5 |
| P42357 | HUTH  | 0.20  | 0.5 |
| P47929 | LEG7  | 0.03  | 0.5 |
| P49788 | TIG1  | 0.02  | 0.5 |
| P60174 | TPIS  | 0.03  | 0.5 |
| P60709 | ACTB  | 0.02  | 0.5 |
| P60953 | CDC42 | 0.04  | 0.5 |
| P61626 | LYSC  | 0.02  | 0.5 |
| P62753 | RS6   | -0.02 | 0.5 |
| P62937 | PPIA  | 0.04  | 0.5 |
| P63261 | ACTG  | 0.02  | 0.5 |
| P68032 | ACTC  | 0.04  | 0.5 |
| P68104 | EF1A1 | 0.04  | 0.5 |
| P68133 | ACTS  | 0.04  | 0.5 |
| P68371 | TBB4B | 0.04  | 0.5 |
| P80188 | NGAL  | 0.02  | 0.5 |
| P98088 | MUC5A | 0.09  | 0.5 |
| P98160 | PGBM  | 0.02  | 0.5 |
| Q01469 | FABP5 | 0.04  | 0.5 |
| Q02818 | NUCB1 | 0.01  | 0.5 |
| Q06830 | PRDX1 | 0.02  | 0.5 |
| Q14508 | WFDC2 | 0.03  | 0.5 |
| Q16651 | PRSS8 | 0.02  | 0.5 |
| Q5VTE0 | EF1A3 | 0.04  | 0.5 |
| Q6KB66 | K2C80 | 0.03  | 0.5 |
| Q86YZ3 | HORN  | 0.06  | 0.5 |
| Q8N1N4 | K2C78 | 0.03  | 0.5 |
| Q96S96 | PEBP4 | 0.04  | 0.5 |
| Q99456 | K1C12 | 0.05  | 0.5 |

|            |       |       |      |
|------------|-------|-------|------|
| Q99935     | PROL1 | 0.02  | 0.5  |
| Q9GZZ8     | LACRT | -0.02 | 0.5  |
| Q9UBT3     | DKK4  | 0.06  | 0.5  |
| O75556     | SG2A1 | -0.02 | 0.75 |
| O95968     | SG1D1 | 0.00  | 0.75 |
| P01034     | CYTC  | 0.00  | 0.75 |
| P04083     | ANXA1 | 0.03  | 0.75 |
| P07339     | CATD  | 0.02  | 0.75 |
| P07602     | SAP   | 0.01  | 0.75 |
| P08727     | K1C19 | 0.02  | 0.75 |
| P08729     | K2C7  | 0.04  | 0.75 |
| P08779     | K1C16 | 0.02  | 0.75 |
| P0CG47     | UBB   | 0.02  | 0.75 |
| P0CG48     | UBC   | 0.02  | 0.75 |
| P13647     | K2C5  | 0.04  | 0.75 |
| P13987     | CD59  | 0.01  | 0.75 |
| P14555     | PA2GA | -0.04 | 0.75 |
| P14618     | KPYM  | 0.01  | 0.75 |
| P23528     | COF1  | 0.01  | 0.75 |
| P31025     | LCN1  | 0.00  | 0.75 |
| P62979     | RS27A | 0.02  | 0.75 |
| P62987     | RL40  | 0.02  | 0.75 |
| P63104     | 1433Z | 0.02  | 0.75 |
| P68363     | TBA1B | 0.01  | 0.75 |
| P80303     | NUCB2 | 0.00  | 0.75 |
| P81605     | DCD   | 0.02  | 0.75 |
| Q16378     | PROL4 | 0.01  | 0.75 |
| Q6UXB2     | CXL17 | -0.02 | 0.75 |
| A0A075B6I0 | LV861 | 0.01  | 1    |
| A0A0C4DH72 | KV106 | 0.03  | 1    |
| O43653     | PSCA  | -0.01 | 1    |
| O43852     | CALU  | 0.00  | 1    |
| O60437     | PEPL  | 0.00  | 1    |

|        |       |       |   |
|--------|-------|-------|---|
| O60814 | H2B1K | 0.00  | 1 |
| P02545 | LMNA  | 0.01  | 1 |
| P02765 | FETUA | 0.01  | 1 |
| P05787 | K2C8  | 0.00  | 1 |
| P06703 | S10A6 | 0.00  | 1 |
| P06731 | CEAM5 | 0.01  | 1 |
| P07237 | PDIA1 | 0.01  | 1 |
| P08246 | ELNE  | 0.04  | 1 |
| P10412 | H14   | 0.00  | 1 |
| P13646 | K1C13 | 0.02  | 1 |
| P13797 | PLST  | -0.01 | 1 |
| P15311 | EZRI  | 0.01  | 1 |
| P16401 | H15   | -0.04 | 1 |
| P19013 | K2C4  | 0.02  | 1 |
| P20933 | ASPG  | 0.00  | 1 |
| P26447 | S10A4 | 0.00  | 1 |
| P27797 | CALR  | -0.01 | 1 |
| P30101 | PDIA3 | 0.00  | 1 |
| P31946 | 1433B | -0.01 | 1 |
| P55064 | AQP5  | -0.01 | 1 |
| P57053 | H2BFS | 0.00  | 1 |
| P58876 | H2B1D | 0.00  | 1 |
| P62805 | H4    | 0.01  | 1 |
| P62807 | H2B1C | 0.00  | 1 |
| P84243 | H33   | 0.00  | 1 |
| Q09666 | AHNK  | 0.00  | 1 |
| Q14697 | GANAB | -0.14 | 1 |
| Q15149 | PLEC  | 0.03  | 1 |
| Q5QNW6 | H2B2F | 0.00  | 1 |
| Q7Z406 | MYH14 | -0.16 | 1 |
| Q8NBJ4 | GOLM1 | 0.00  | 1 |
| Q93079 | H2B1H | 0.00  | 1 |
| Q99877 | H2B1N | 0.00  | 1 |



|        |       |      |   |
|--------|-------|------|---|
| Q99879 | H2B1M | 0.00 | 1 |
| Q99880 | H2B1L | 0.00 | 1 |
| Q9UBC9 | SPRR3 | 0.02 | 1 |

<sup>1</sup> p-values calculated using the Wilcoxon Signed-Rank test
